# Supplementary material
Source: PubMed Central journal article supplement (PMC6643718)

## Supporting Information for

### Aldehyde Oxidase: Reaction Mechanism and Prediction of Site of Metabolism

*Marco Montefiori, Flemming Steen Jørgensen, Lars Olsen\**

Department of Drug Design and Pharmacology, University of Copenhagen, Universitetsparken 2,  
DK-2100 Copenhagen, Denmark

#### List of Contents

**Definitions.** In Table S1-S1, *BS1* corresponds to energies determined with the BS1 basis set; *BS2* corresponds to energies determined with the BS2 basis set; *ZPE* includes zero-point vibrational energy corrections at BS1 level in addition to BS2 energies;  $\epsilon = 4$  and  $\epsilon = 80$  includes solvent corrections in addition to BS2 and ZPE corrections.

**Table S1.** B3LYP (A) and B3LYP-D3 (B) transition state energies (kJ/mol) and distances (Å) for a concerted reaction (Fig. 1, Reaction 1) for 6-substituted 4-quinazolinones. All energy contributions are given relative to the sum of the MoCo and substrate energies.

**Table S2.** B3LYP (A) and B3LYP-D3 (B) transition state energies (kJ/mol) and distances (Å) for a concerted reaction with deprotonated MoCo (Fig. 1, Reaction 2) for 6-substituted 4-quinazolinones. All energy contributions are given relative to the sum of the MoCo and substrate energies.

**Table S3.** B3LYP (A) and B3LYP-D3 (B) transition state energies (kJ/mol) and distances (Å) for an initial proton transfer and a subsequent concerted reaction with deprotonated MoCo (Fig. 1, Reaction 3) for 6-substituted 4-quinazolinones. All energy contributions are given relative to the sum of the MoCo and substrate energies.

**Table S4.** B3LYP (A) and B3LYP-D3 (B) transition state energies (kJ/mol) and distances (Å) for an initial proton transfer and a subsequent stepwise reaction (Fig. 1, Reaction 4) for negatively charged xanthine. All energy contributions are given relative to the sum of the MoCo and substrate energies.

**Table S5.** B3LYP (A) and B3LYP-D3 (B) transition state energies (kJ/mol) and distances (Å) for a concerted reaction (Fig. 1, Reaction 1) for 6-substituted quinazolines. All energy contributions are given relative to the sum of the MoCo and substrate energies.

**Table S6.** B3LYP (A) and B3LYP-D3 (B) transition state energies (kJ/mol) and distances (Å) for a concerted reaction (Fig. 1, Reaction 1) for quinazoline. All energy contributions are given relative to the sum of the MoCo and substrate energies.

**Table S7.** B3LYP (A) and B3LYP-D3 (B) transition state energies (kJ/mol) and distances (Å) for a concerted reaction (Fig. 1, Reaction 1) for phthalazine. All energy contributions are given relative to the sum of the MoCo and substrate energies.

**Table S8.** B3LYP (A) and B3LYP-D3 (B) transition state energies (kJ/mol) and distances (Å) for a concerted reaction (Fig. 1, Reaction 1) for quinoline. All energy contributions are given relative to the sum of the MoCo and substrate energies.

**Table S9.** B3LYP (A) and B3LYP-D3 (B) transition state energies (kJ/mol) and distances (Å) for a concerted reaction (Fig. 1, Reaction 1) for 2-amino-9-methylpurine. All energy contributions are given relative to the sum of the MoCo and substrate energies.

**Table S10.** B3LYP (A) and B3LYP-D3 (B) transition state energies (kJ/mol) and distances (Å) for a concerted reaction (Fig. 1, Reaction 1) for 4-methylacridine. All energy contributions are given relative to the sum of the MoCo and substrate energies.

**Table S11.** B3LYP (A) and B3LYP-D3 (B) transition state energies (kJ/mol) and distances (Å) for a concerted reaction (Fig. 1, Reaction 1) for phenanthridine. All energy contributions are given relative to the sum of the MoCo and substrate energies.

**Table S12.** Fast methods to predict the site of metabolism for quinazoline (A), 2-amino-9-methylpurine (B), 4-methylacridine (C), phenanthridine (D), phthalazine (E) and quinoline (F). All energies (kJ/mol) are calculated at the B3LYP level of theory using BS1 and given relative to the sum of the MoCo and substrate energies.

**Figure S1.** Reaction mechanisms of 4-quinazolinones (A) and negatively charged xanthine (B). studied in this work.

**Figure S2.** Reactions for formation of 1) the products, 2) the hydroxylated tetrahedral intermediate, and 3) the cation intermediate.

**Figure S3.** Transition state energies versus estimates of the reactivity based on DFT calculated properties. The correlation coefficients  $R^2$  are given in Table 2.

**Figure S4.** Distribution of transition state energies and reactivity based on DFT calculated properties. Red bars show the values for the SOMs and blue for the other aromatic C atoms.

**Table S1-A.** B3LYP transition state energies (kJ/mol) and distances (Å) for the concerted reaction (Fig. 1, Reaction 1) for 6-substituted 4-quinazolinones. All energy contributions are given relative to the sum of the MoCo and substrate energies.

| R                |              | BS1   | BS2   | ZPE   | $\epsilon=4$ | $\epsilon=80$ | Mo – O | O – C | C – H | H – S |
|------------------|--------------|-------|-------|-------|--------------|---------------|--------|-------|-------|-------|
| NO <sub>2</sub>  | React. Compl | -84.9 | -73.5 | -70.3 | -21.4        | 3.4           | 1.96   | 3.22  | 1.10  | 3.38  |
|                  | TS           | 73.8  | 100.4 | 93.3  | 142.1        | 165.7         | 2.19   | 1.45  | 1.43  | 1.57  |
|                  | Prod. Compl  | -27.8 | -8.4  | -11.5 | 28.8         | 49.0          | 4.08   | 1.33  | 5.61  | 1.36  |
|                  | MoCo + Prod. | 48.8  | 58.3  | 55.1  | 54.9         | 55.3          | -      |       | -     |       |
| CF <sub>3</sub>  | React. Compl | -74.4 | -63.6 | -60.6 | -16.8        | 4.8           | 1.95   | 3.21  | 1.10  | 3.34  |
|                  | TS           | 90.1  | 117.0 | 109.4 | 152.1        | 172.0         | 2.18   | 1.46  | 1.41  | 1.58  |
|                  | Prod. Compl  | -10.2 | 13.0  | 10.5  | 42.7         | 57.8          | 2.67   | 1.34  | 3.82  | 1.36  |
|                  | MoCo + Prod. | 50.2  | 59.6  | 56.4  | 56.5         | 57.2          | -      |       | -     |       |
| Cl               | React. Compl | -69.8 | -58.4 | -55.4 | -15.8        | 3.6           | 1.95   | 3.31  | 1.10  | 3.45  |
|                  | TS           | 100.2 | 127.4 | 119.8 | 157.6        | 174.8         | 2.18   | 1.47  | 1.40  | 1.59  |
|                  | Prod. Compl  | -4.3  | 19.2  | 17.4  | 44.6         | 57.0          | 2.59   | 1.35  | 3.78  | 1.36  |
|                  | MoCo + Prod. | 52.2  | 61.5  | 58.2  | 58.3         | 105.6         | -      |       | -     |       |
| H                | React. Compl | -61.9 | -49.8 | -47.2 | -11.8        | 5.2           | 1.95   | 3.24  | 1.10  | 3.57  |
|                  | TS           | 108.4 | 136.3 | 128.6 | 161.9        | 176.7         | 2.17   | 1.48  | 1.39  | 1.60  |
|                  | Prod. Compl  | 1.6   | 25.8  | 24.1  | 47.4         | 57.6          | 2.59   | 1.35  | 3.78  | 1.36  |
|                  | MoCo + Prod. | 51.9  | 61.1  | 57.9  | 88.6         | 105.5         | -      |       | -     |       |
| CH <sub>3</sub>  | React. Compl | -60.4 | -48.9 | -46.0 | -11.6        | 4.5           | 1.95   | 3.26  | 1.10  | 3.39  |
|                  | TS           | 111.7 | 140.4 | 132.1 | 164.3        | 178.0         | 2.17   | 1.48  | 1.38  | 1.61  |
|                  | Prod. Compl  | 5.1   | 29.6  | 27.6  | 49.8         | 59.7          | 2.57   | 1.35  | 3.77  | 1.36  |
|                  | MoCo + Prod. | 52.7  | 62.0  | 58.7  | 59.1         | 61.6          | -      |       | -     |       |
| OCH <sub>3</sub> | React. Compl | -57.9 | -46.0 | -43.1 | -10.2        | 5.1           | 1.95   | 3.36  | 1.10  | 3.53  |
|                  | TS           | 115.9 | 143.8 | 135.6 | 166.0        | 178.4         | 2.17   | 1.48  | 1.38  | 1.61  |
|                  | Prod. Compl  | 7.8   | 31.9  | 30.1  | 50.9         | 59.7          | 2.57   | 1.35  | 3.77  | 1.36  |
|                  | MoCo + Prod. | 54.6  | 63.8  | 60.4  | 60.8         | 61.6          | -      |       | -     |       |
| NH <sub>2</sub>  | React. Compl | -53.5 | -43.5 | -40.4 | -9.7         | 4.2           | 1.95   | 3.34  | 1.10  | 3.45  |
|                  | TS           | 122.0 | 148.2 | 140.7 | 167.7        | 177.5         | 2.17   | 1.49  | 1.37  | 1.61  |
|                  | Prod. Compl  | 12.1  | 35.0  | 34.0  | 52.4         | 59.7          | 2.54   | 1.35  | 3.76  | 1.36  |
|                  | MoCo + Prod. | 56.1  | 64.9  | 61.7  | 62.3         | 63.2          | -      |       | -     |       |

**Table S1-B.** B3LYP-D3 transition state energies (kJ/mol) and distances (Å) for the concerted reaction (Fig. 1, Reaction 1) for 6-substituted 4-quinazolinones. All energy contributions are given relative to the sum of the MoCo and substrate energies.

| R                |              | BS1    | BS2   | ZPE   | $\epsilon=4$ | $\epsilon=80$ | Mo – O | O – C | C – H | H – S |
|------------------|--------------|--------|-------|-------|--------------|---------------|--------|-------|-------|-------|
| NO <sub>2</sub>  | React. Compl | -106.5 | -92.8 | -89.0 | -39.8        | -14.9         | 1.96   | 3.31  | 1.10  | 3.56  |
|                  | TS           | 48.4   | 74.8  | 67.8  | 116.9        | 140.9         | 2.19   | 1.45  | 1.42  | 1.58  |
|                  | Prod. Compl  | -50.4  | -28.2 | -30.2 | 12.3         | 33.8          | 3.65   | 1.33  | 5.55  | 1.36  |
|                  | MoCo + Prod. | 49.6   | 58.9  | 55.5  | 55.4         | 55.4          |        |       |       |       |
| CF <sub>3</sub>  | React. Compl | -96.3  | -82.7 | -79.0 | -35.4        | -13.8         | 1.96   | 3.33  | 1.10  | 3.58  |
|                  | TS           | 65.1   | 91.7  | 84.2  | 127.3        | 147.5         | 2.18   | 1.46  | 1.40  | 1.59  |
|                  | Prod. Compl  | -34.1  | -10.8 | -12.7 | 19.5         | 34.6          | 2.60   | 1.34  | 3.83  | 1.36  |
|                  | MoCo + Prod. | 51.0   | 60.3  | 56.9  | 57.2         | 57.2          |        |       |       |       |
| Cl               | React. Compl | -90.1  | -76.3 | -72.7 | -33.2        | -13.9         | 1.96   | 3.33  | 1.10  | 3.62  |
|                  | TS           | 75.3   | 102.3 | 94.8  | 133.1        | 150.6         | 2.18   | 1.47  | 1.39  | 1.60  |
|                  | Prod. Compl  | -27.1  | -3.4  | -5.3  | 22.4         | 35.0          | 2.57   | 1.34  | 3.78  | 1.36  |
|                  | MoCo + Prod. | 53.0   | 62.1  | 58.6  | 59.1         | 59.1          |        |       |       |       |
| H                | React. Compl | -73.7  | -65.2 | -63.0 | -29.4        | -13.5         | 1.94   | 2.92  | 1.09  | 2.94  |
|                  | TS           | 83.7   | 111.5 | 103.8 | 137.7        | 152.8         | 2.17   | 1.48  | 1.38  | 1.61  |
|                  | Prod. Compl  | -21.0  | 3.2   | 1.6   | 24.9         | 35.1          | 2.54   | 1.35  | 3.76  | 1.36  |
|                  | MoCo + Prod. | 52.7   | 61.8  | 58.4  | 59.3         | 59.3          |        |       |       |       |
| CH <sub>3</sub>  | React. Compl | -80.3  | -65.9 | -62.4 | -28.5        | -12.6         | 1.95   | 3.36  | 1.10  | 3.57  |
|                  | TS           | 86.9   | 115.0 | 107.2 | 139.8        | 153.8         | 2.17   | 1.48  | 1.37  | 1.61  |
|                  | Prod. Compl  | -17.5  | 7.2   | 5.1   | 27.4         | 36.7          | 2.54   | 1.35  | 3.75  | 1.36  |
|                  | MoCo + Prod. | 53.5   | 62.7  | 59.2  | 60.1         | 60.1          |        |       |       |       |
| OCH <sub>3</sub> | React. Compl | -77.4  | -63.3 | -60.0 | -27.5        | -12.4         | 1.96   | 3.33  | 1.10  | 3.61  |
|                  | TS           | 91.2   | 119.0 | 110.9 | 141.7        | 154.4         | 2.17   | 1.48  | 1.37  | 1.62  |
|                  | Prod. Compl  | -14.8  | 9.4   | 7.6   | 28.4         | 37.1          | 2.53   | 1.35  | 3.75  | 1.36  |
|                  | MoCo + Prod. | 55.4   | 64.5  | 60.9  | 61.7         | 61.7          |        |       |       |       |
| NH <sub>2</sub>  | React. Compl | -72.7  | -60.3 | -56.3 | -26.2        | -12.7         | 1.95   | 3.37  | 1.10  | 3.54  |
|                  | TS           | 97.4   | 123.4 | 115.9 | 143.5        | 153.6         | 2.17   | 1.49  | 1.36  | 1.62  |
|                  | Prod. Compl  | -10.5  | 12.5  | 11.4  | 30.0         | 37.3          | 2.52   | 1.35  | 3.74  | 1.36  |
|                  | MoCo + Prod. | 56.9   | 65.6  | 62.1  | 63.4         | 63.4          |        |       |       |       |

**Table S2-A.** B3LYP transition state energies (kJ/mol) and distances (Å) for the concerted reaction with deprotonated MoCo (Fig. 1, Reaction 2) for 6-substituted 4-quinazolinones. All energy contributions are given relative to the sum of the MoCo and substrate energies.

| R                |              | BS1    | BS2    | ZPE    | $\epsilon=4$ | $\epsilon=80$ | Mo – O | O – C | C – H | H – S |
|------------------|--------------|--------|--------|--------|--------------|---------------|--------|-------|-------|-------|
| NO <sub>2</sub>  | React. Compl | -200.8 | 184.1  | -185.7 | -90.8        | -28.3         | 1.74   | 3.06  | 1.10  | 3.58  |
|                  | TS           | -171.2 | -140.9 | -150.6 | -24.4        | 60.8          | 1.97   | 1.35  | 1.33  | 1.71  |
|                  | Prod. Compl  | -295.8 | -268.0 | -271.6 | -125.6       | -66.4         | 2.14   | 1.26  | 3.29  | 1.36  |
| CF <sub>3</sub>  | React. Compl | -173.2 | -157.4 | -159.2 | -81.4        | -24.2         | 1.74   | 3.02  | 1.11  | 3.54  |
|                  | TS           | -122.4 | -91.3  | -102.3 | 8.3          | 82.9          | 1.97   | 1.36  | 1.32  | 1.73  |
|                  | Prod. Compl  | -254.1 | -226.4 | -230.8 | -125.6       | -53.8         | 2.17   | 1.26  | 3.22  | 1.36  |
| Cl               | React. Compl | -162.1 | -146.2 | -147.4 | -78.5        | -25.6         | 1.74   | 3.04  | 1.10  | 3.55  |
|                  | TS           | -95.0  | -63.4  | -73.7  | 24.1         | 92.0          | 1.96   | 1.37  | 1.31  | 1.75  |
|                  | Prod. Compl  | -231.8 | -203.8 | -208.1 | -114.7       | -48.7         | 2.17   | 1.26  | 3.29  | 1.36  |
| H                | React. Compl | -146.6 | -129.5 | -130.5 | -70.5        | -22.9         | 1.74   | 3.06  | 1.10  | 3.56  |
|                  | TS           | -70.0  | -36.6  | -46.9  | 39.4         | 100.2         | 1.96   | 1.38  | 1.29  | 1.78  |
|                  | Prod. Compl  | -210.0 | -180.6 | -185.4 | -102.7       | -43.3         | 2.17   | 1.26  | 3.26  | 1.36  |
| CH <sub>3</sub>  | React. Compl | -143.3 | -125.8 | -126.8 | -69.6        | -24.2         | 1.74   | 3.06  | 1.10  | 3.56  |
|                  | TS           | -64.4  | -29.6  | -40.9  | 44.4         | 103.4         | 1.96   | 1.38  | 1.30  | 1.77  |
|                  | Prod. Compl  | -204.4 | -173.9 | -179.3 | -97.8        | -39.8         | 2.17   | 1.26  | 3.28  | 1.36  |
| OCH <sub>3</sub> | React. Compl | -138.9 | -122.0 | -123.2 | -68.6        | -23.4         | 1.74   | 3.06  | 1.10  | 3.55  |
|                  | TS           | -56.9  | -23.1  | -34.3  | 48.3         | 107.0         | 1.96   | 1.38  | 1.29  | 1.77  |
|                  | Prod. Compl  | -198.0 | -168.3 | -173.5 | -94.9        | -37.1         | 2.18   | 1.26  | 3.41  | 1.36  |
| NH <sub>2</sub>  | React. Compl | -130.4 | -116.2 | -116.4 | -66.3        | -24.1         | 1.74   | 3.07  | 1.10  | 3.57  |
|                  | TS           | -42.7  | -13.2  | -23.4  | 55.4         | 111.6         | 1.96   | 1.38  | 1.29  | 1.77  |
|                  | Prod. Compl  | -185.3 | -159.5 | -163.8 | -88.6        | -33.1         | 2.17   | 1.26  | 3.25  | 1.36  |

**Table S2-B.** B3LYP-D3 transition state energies (kJ/mol) and distances (Å) for the concerted reaction with deprotonated MoCo (Fig. 1, Reaction 2) for 6-substituted 4-quinazolinones. All energy contributions are given relative to the sum of the MoCo and substrate energies.

| R                |              | BS1    | BS2    | ZPE    | $\epsilon=4$ | $\epsilon=80$ | Mo – O | O – C | C – H | H – S |
|------------------|--------------|--------|--------|--------|--------------|---------------|--------|-------|-------|-------|
| NO <sub>2</sub>  | React. Compl | -217.7 | -201.1 | -202.6 | -107.3       | -44.4         | 1.74   | 3.02  | 1.10  | 3.61  |
|                  | TS           | -191.7 | -161.9 | -170.9 | -43.9        | 41.6          | 1.97   | 1.36  | 1.32  | 1.73  |
|                  | Prod. Compl  | -314.4 | -287.4 | -291.1 | -168.4       | -87.0         | 2.13   | 1.26  | 3.15  | 1.36  |
| CF <sub>3</sub>  | React. Compl | -190.3 | -174.4 | -176.1 | -97.8        | -40.4         | 1.74   | 2.99  | 1.10  | 3.57  |
|                  | TS           | -143.0 | -112.3 | -122.7 | -11.9        | 62.7          | 1.97   | 1.37  | 1.31  | 1.75  |
|                  | Prod. Compl  | -186.8 | -159.8 | -164.2 | -59.7        | 11.7          | 2.17   | 1.26  | 3.24  | 1.36  |
| Cl               | React. Compl | -179.1 | -163.1 | -164.3 | -94.7        | -41.5         | 1.74   | 3.00  | 1.10  | 3.58  |
|                  | TS           | -115.7 | -84.6  | -94.6  | 3.0          | 70.8          | 1.96   | 1.37  | 1.30  | 1.76  |
|                  | Prod. Compl  | -250.6 | -223.1 | -227.3 | -134.3       | -68.6         | 2.17   | 1.26  | 3.19  | 1.36  |
| H                | React. Compl | -159.2 | -145.2 | -146.8 | -88.2        | -41.9         | 1.74   | 2.97  | 1.10  | 3.27  |
|                  | TS           | -90.7  | -57.7  | -67.8  | 18.4         | 79.1          | 1.96   | 1.38  | 1.29  | 1.78  |
|                  | Prod. Compl  | -228.9 | -200.0 | -204.6 | -122.3       | -63.2         | 2.17   | 1.26  | 3.20  | 1.36  |
| CH <sub>3</sub>  | React. Compl | -160.0 | -142.4 | -143.5 | -85.7        | -40.0         | 1.74   | 3.02  | 1.10  | 3.57  |
|                  | TS           | -85.2  | -50.8  | -61.8  | 23.5         | 82.5          | 1.96   | 1.38  | 1.29  | 1.77  |
|                  | Prod. Compl  | -224.4 | -194.6 | -199.5 | -118.6       | -61.1         | 2.17   | 1.26  | 3.13  | 1.36  |
| OCH <sub>3</sub> | React. Compl | -155.5 | -138.7 | -139.9 | -85.0        | -39.6         | 1.74   | 3.03  | 1.10  | 3.57  |
|                  | TS           | -77.6  | -44.1  | -54.9  | 28.0         | 86.8          | 1.96   | 1.38  | 1.29  | 1.79  |
|                  | Prod. Compl  | -216.6 | -187.7 | -192.9 | -114.6       | -57.0         | 2.17   | 1.26  | 3.11  | 1.36  |
| NH <sub>2</sub>  | React. Compl | -147.0 | -132.9 | -133.0 | -82.3        | -39.8         | 1.74   | 3.03  | 1.10  | 3.60  |
|                  | TS           | -63.4  | -34.2  | -43.9  | 34.9         | 91.0          | 1.96   | 1.39  | 1.29  | 1.78  |
|                  | Prod. Compl  | -204.1 | -178.8 | -183.0 | -108.4       | -53.1         | 2.17   | 1.26  | 3.16  | 1.36  |

**Table S3-A.** B3LYP transition state energies (kJ/mol) and distances (Å) for initial proton transfer and a subsequent concerted reaction with deprotonated MoCo (Fig. 1, Reaction 3) for 6-substituted 4-quinazolinones. All energy contributions are given relative to the sum of the MoCo and substrate energies.

| R               |       | BS1    | BS2   | ZPE   | $\epsilon=4$ | $\epsilon=80$ | Mo – O <sub>1</sub> | Mo – O <sub>2</sub> | H <sub>MoCo</sub> -O <sub>1</sub> | H <sub>MoCo</sub> - N | O <sub>2</sub> – C | C – H <sub>Sub</sub> | H <sub>Sub</sub> – S |
|-----------------|-------|--------|-------|-------|--------------|---------------|---------------------|---------------------|-----------------------------------|-----------------------|--------------------|----------------------|----------------------|
| NO <sub>2</sub> | R     | -56.0  | -40.3 | -35.0 | -8.0         | 5.9           | 1.92                | 1.71                | 0.98                              | 2.02                  | 3.03               | 1.10                 | 1.92                 |
|                 | TS-1  | 9.4    | 37.5  | 36.0  | 85.6         | 110.9         | 1.84                | 1.82                | 1.08                              | 1.50                  | 1.71               | 1.10                 | 3.12                 |
|                 | Int-1 | -88.2  | -58.2 | -46.3 | 2.3          | 27.4          | 1.70                | 1.98                | 2.26                              | 1.02                  | 1.39               | 1.11                 | 2.87                 |
|                 | TS-2  | -16.1  | 17.6  | 13.8  | 53.8         | 72.1          | 1.70                | 2.03                | 2.28                              | 1.02                  | 1.30               | 1.48                 | 1.59                 |
|                 | P     | -107.2 | -75.7 | -75.3 | -49.4        | -40.1         | 1.72                | 2.23                | 1.65                              | 1.06                  | 1.23               | 3.51                 | 1.36                 |
| CF <sub>3</sub> | R     | -49.2  | -33.3 | -27.9 | -6.3         | 4.5           | 1.92                | 1.71                | 0.98                              | 2.00                  | 3.08               | 1.10                 | 2.70                 |
|                 | TS-1  | 25.4   | 53.7  | 49.1  | 86.6         | 104.7         | 1.83                | 1.82                | 1.14                              | 1.36                  | 1.79               | 1.10                 | 3.26                 |
|                 | Int-1 | -72.6  | -42.6 | -31.1 | 12.0         | 34.0          | 1.70                | 1.97                | 2.30                              | 1.02                  | 1.39               | 1.11                 | 2.86                 |
|                 | TS-2  | -1.4   | 32.6  | 28.7  | 63.6         | 79.0          | 1.70                | 2.04                | 2.21                              | 1.02                  | 1.31               | 1.46                 | 1.61                 |
|                 | P     | -95.1  | -63.7 | -63.3 | -45.2        | -38.2         | 1.72                | 2.26                | 1.63                              | 1.06                  | 1.24               | 3.48                 | 1.36                 |
| Cl              | R     | -44.5  | -28.4 | -23.1 | -5.0         | 4.0           | 1.92                | 1.71                | 0.98                              | 1.99                  | 3.10               | 1.10                 | 2.73                 |
|                 | TS-1  | 31.9   | 59.2  | 56.1  | 75.2         | 83.0          | 1.81                | 1.80                | 1.28                              | 1.21                  | 1.97               | 1.09                 | 3.00                 |
|                 | Int-1 | -60.7  | -30.3 | -18.8 | 20.3         | 40.1          | 1.70                | 1.97                | 2.32                              | 1.02                  | 1.40               | 1.11                 | 2.86                 |
|                 | TS-2  | 8.3    | 42.4  | 38.0  | 66.1         | 77.7          | 1.69                | 2.03                | 2.46                              | 1.02                  | 1.31               | 1.47                 | 1.60                 |
|                 | P     | -87.7  | -56.4 | -55.9 | -41.7        | -36.6         | 1.73                | 2.26                | 1.63                              | 1.06                  | 1.24               | 3.39                 | 1.36                 |
| H               | R     | -39.5  | -22.5 | -17.1 | -3.8         | 2.5           | 1.92                | 1.71                | 0.98                              | 1.96                  | 3.13               | 1.10                 | 2.75                 |
|                 | TS-1  | 36.9   | 63.9  | 62.6  | 70.5         | 71.9          | 1.80                | 1.79                | 1.35                              | 1.16                  | 2.04               | 1.09                 | 2.93                 |

|                  |       |       |       |       |       |       |      |      |      |      |      |      |      |
|------------------|-------|-------|-------|-------|-------|-------|------|------|------|------|------|------|------|
|                  | Int-1 | -53.0 | -21.8 | -10.5 | 24.1  | 41.5  | 1.70 | 1.97 | 2.34 | 1.02 | 1.40 | 1.11 | 2.85 |
|                  | TS-2  | 13.4  | 48.2  | 44.1  | 69.0  | 78.9  | 1.70 | 2.03 | 2.40 | 1.02 | 1.31 | 1.45 | 1.61 |
|                  | P     | 84.5  | -52.8 | -51.7 | -42.0 | -39.9 | 1.72 | 2.26 | 1.66 | 1.06 | 1.24 | 3.49 | 1.36 |
| CH <sub>3</sub>  | R     | -36.7 | -19.5 | -14.7 | -2.5  | 2.9   | 1.92 | 1.71 | 0.98 | 1.96 | 3.14 | 1.10 | 2.76 |
|                  | TS-1  | 40.5  | 67.9  | 65.2  | 74.3  | 76.3  | 1.80 | 1.79 | 1.31 | 1.18 | 2.00 | 1.09 | 3.19 |
|                  | Int-1 | -48.3 | -16.4 | -5.7  | 28.5  | 45.5  | 1.70 | 1.97 | 2.35 | 1.02 | 1.40 | 1.11 | 2.85 |
|                  | TS-2  | 17.6  | 52.8  | 48.3  | 72.3  | 81.4  | 1.70 | 2.03 | 2.42 | 1.02 | 1.31 | 1.44 | 1.61 |
|                  | P     | -81.0 | -49.1 | -48.5 | -39.5 | -37.3 | 1.72 | 2.26 | 1.65 | 1.06 | 1.24 | 3.41 | 1.36 |
| OCH <sub>3</sub> | R     | -36.6 | -19.7 | -14.5 | -3.3  | 1.8   | 1.92 | 1.71 | 0.98 | 1.96 | 3.16 | 1.10 | 2.78 |
|                  | TS-1  | 42.2  | 69.0  | 67.3  | 72.8  | 73.0  | 1.80 | 1.79 | 1.34 | 1.17 | 2.04 | 1.09 | 3.03 |
|                  | Int-1 | -42.9 | -11.6 | -0.8  | 32.4  | 48.8  | 1.70 | 1.96 | 2.35 | 1.02 | 1.40 | 1.11 | 2.84 |
|                  | TS-2  | 22.6  | 57.0  | 52.4  | 73.7  | 81.4  | 1.69 | 2.03 | 2.53 | 1.02 | 1.31 | 1.45 | 1.61 |
|                  | P     | -77.8 | -46.1 | -45.2 | -37.6 | -35.8 | 1.72 | 2.26 | 1.66 | 1.05 | 1.24 | 3.48 | 1.36 |
| NH <sub>2</sub>  | R     | -33.0 | -17.1 | -11.3 | -2.3  | 1.3   | 1.92 | 1.71 | 0.99 | 1.96 | 3.16 | 1.10 | 2.79 |
|                  | TS-1  | 46.1  | 71.6  | 73.0  | 72.4  | 69.0  | 1.79 | 1.79 | 1.41 | 1.13 | 2.07 | 1.09 | 2.92 |
|                  | Int-1 | -35.2 | -6.1  | 5.4   | 37.1  | 52.8  | 1.70 | 1.96 | 2.37 | 1.02 | 1.40 | 1.11 | 2.85 |
|                  | TS-2  | 29.8  | 62.6  | 58.5  | 78.0  | 84.2  | 1.69 | 2.03 | 2.46 | 1.02 | 1.31 | 1.44 | 1.62 |
|                  | P     | -72.0 | -41.8 | -40.4 | -35.8 | -36.0 | 1.72 | 2.25 | 1.68 | 1.05 | 1.24 | 3.35 | 1.36 |



**Table S3-B.** B3LYP-D3 transition state energies (kJ/mol) and distances (Å) for initial proton transfer and a subsequent concerted reaction with deprotonated MoCo (Fig. 1, Reaction 3) for 6-substituted 4-quinazolinones. All energy contributions are given relative to the sum of the MoCo and substrate energies.

| R               |       | BS1    | BS2   | ZPE   | $\epsilon=4$ | $\epsilon=80$ | Mo – O <sub>1</sub> | Mo – O <sub>2</sub> | H <sub>MoCo</sub> -O <sub>1</sub> | H <sub>MoCo</sub> - N | O <sub>2</sub> – C | C – H <sub>Sub</sub> | H <sub>Sub</sub> – S |
|-----------------|-------|--------|-------|-------|--------------|---------------|---------------------|---------------------|-----------------------------------|-----------------------|--------------------|----------------------|----------------------|
| NO <sub>2</sub> | R     | -82.3  | -65.1 | -59.6 | -32.0        | -18.0         | 1.92                | 1.71                | 0.98                              | 1.94                  | 2.90               | 1.10                 | 2.61                 |
|                 | TS-1  | -19.8  | 8.4   | 7.3   | 57.8         | 83.7          | 1.84                | 1.83                | 1.07                              | 1.51                  | 1.69               | 1.10                 | 3.03                 |
|                 | Int-1 | -117.2 | -87.8 | -76.0 | -28.5        | -3.8          | 1.70                | 1.98                | 2.30                              | 1.02                  | 1.39               | 1.11                 | 2.86                 |
|                 | TS-2  | -42.0  | -8.5  | -12.3 | 27.9         | 46.3          | 1.70                | 2.03                | 2.27                              | 1.02                  | 1.31               | 1.47                 | 1.60                 |
|                 | P     | -129.4 | -98.2 | -97.8 | -71.9        | -62.6         | 1.72                | 2.22                | 1.64                              | 1.06                  | 1.24               | 3.42                 | 1.36                 |
| CF <sub>3</sub> | R     | -75.0  | -57.6 | -52.0 | -30.5        | -19.8         | 1.92                | 1.71                | 0.99                              | 1.91                  | 2.97               | 1.10                 | 2.64                 |
|                 | TS-1  | -4.6   | 22.5  | 18.4  | 43.0         | 53.7          | 1.81                | 1.80                | 1.26                              | 1.23                  | 1.95               | 1.09                 | 3.11                 |
|                 | Int-1 | -101.5 | -72.2 | -60.9 | -18.6        | 3.8           | 1.70                | 1.97                | 2.34                              | 1.02                  | 1.39               | 1.11                 | 2.86                 |
|                 | TS-2  | -27.6  | 6.0   | 1.9   | 36.5         | 51.8          | 1.70                | 2.04                | 2.25                              | 1.02                  | 1.31               | 1.46                 | 1.61                 |
|                 | P     | -117.3 | -86.2 | -85.8 | -67.9        | -61.0         | 1.72                | 2.25                | 1.63                              | 1.06                  | 1.23               | 3.45                 | 1.36                 |
| Cl              | R     | -70.0  | -52.5 | -46.9 | -29.4        | -20.8         | 1.92                | 1.71                | 0.99                              | 1.91                  | 3.01               | 1.10                 | 2.68                 |
|                 | TS-1  | 0.9    | 27.7  | 25.4  | 40.3         | 45.8          | 1.80                | 1.79                | 1.31                              | 1.19                  | 2.03               | 1.09                 | 2.94                 |
|                 | Int-1 | -90.0  | -60.1 | -48.7 | -10.3        | 9.3           | 1.70                | 1.97                | 2.30                              | 1.02                  | 1.40               | 1.11                 | 2.88                 |
|                 | TS-2  | -17.5  | 16.4  | 11.9  | 40.3         | 52.0          | 1.69                | 2.03                | 2.45                              | 1.02                  | 1.31               | 1.46                 | 1.60                 |
|                 | P     | -109.9 | -78.9 | -78.4 | -64.4        | -59.4         | 1.72                | 2.25                | 1.63                              | 1.06                  | 1.24               | 3.34                 | 1.36                 |
| H               | R     | -64.8  | -46.6 | -40.9 | -27.6        | -21.4         | 1.92                | 1.71                | 0.99                              | 1.90                  | 3.03               | 1.10                 | 2.70                 |

|                  |       |        |       |       |       |       |      |      |      |      |      |      |      |
|------------------|-------|--------|-------|-------|-------|-------|------|------|------|------|------|------|------|
|                  | TS-1  | 5.8    | 32.8  | 31.7  | 39.1  | 40.3  | 1.80 | 1.79 | 1.35 | 1.16 | 2.06 | 1.09 | 2.90 |
|                  | Int-1 | -82.1  | -51.3 | -40.0 | -6.0  | 11.0  | 1.70 | 1.96 | 2.33 | 1.02 | 1.40 | 1.11 | 2.87 |
|                  | TS-2  | -12.3  | 22.1  | 17.8  | 43.0  | 53.1  | 1.70 | 2.03 | 2.35 | 1.02 | 1.31 | 1.45 | 1.62 |
|                  | P     | -106.8 | -75.3 | -74.2 | -64.5 | -61.8 | 1.72 | 2.25 | 1.66 | 1.06 | 1.24 | 3.46 | 1.36 |
| CH <sub>3</sub>  | R     | -61.9  | -43.5 | -38.4 | -26.3 | -21.0 | 1.92 | 1.71 | 0.99 | 1.89 | 3.04 | 1.10 | 2.71 |
|                  | TS-1  | 8.1    | 35.3  | 34.0  | 40.7  | 41.4  | 1.80 | 1.79 | 1.35 | 1.16 | 2.04 | 1.09 | 2.98 |
|                  | Int-1 | -78.1  | -46.7 | -35.6 | -2.2  | 14.3  | 1.70 | 1.96 | 2.33 | 1.02 | 1.40 | 1.11 | 2.87 |
|                  | TS-2  | -8.3   | 26.6  | 22.2  | 46.3  | 55.5  | 1.69 | 2.03 | 2.40 | 1.02 | 1.31 | 1.44 | 1.62 |
|                  | P     | -103.2 | -71.5 | -71.0 | -62.2 | -60.1 | 1.72 | 2.25 | 1.65 | 1.06 | 1.24 | 3.35 | 1.36 |
| OCH <sub>3</sub> | R     | -61.9  | -43.7 | -38.1 | -27.1 | -22.1 | 1.92 | 1.71 | 0.99 | 1.88 | 3.05 | 1.10 | 2.74 |
|                  | TS-1  | 10.8   | 37.6  | 37.4  | 41.7  | 41.3  | 1.79 | 1.79 | 1.38 | 1.14 | 2.06 | 1.09 | 2.92 |
|                  | Int-1 | -72.4  | -41.7 | -30.8 | 1.7   | 17.7  | 1.70 | 1.96 | 2.35 | 1.02 | 1.40 | 1.11 | 2.86 |
|                  | TS-2  | -3.4   | 31.0  | 26.4  | 48.8  | 57.1  | 1.69 | 2.03 | 2.48 | 1.02 | 1.31 | 1.43 | 1.62 |
|                  | P     | -100.0 | -68.5 | -67.7 | -60.0 | -58.2 | 1.72 | 2.26 | 1.65 | 1.06 | 1.24 | 3.41 | 1.36 |
| NH <sub>2</sub>  | R     | -58.2  | -41.0 | -34.8 | -26.0 | -22.7 | 1.92 | 1.71 | 0.99 | 1.88 | 3.06 | 1.10 | 2.74 |
|                  | TS-1  | 14.8   | 40.1  | 41.5  | 41.3  | 38.1  | 1.79 | 1.79 | 1.40 | 1.13 | 2.07 | 1.09 | 2.95 |
|                  | Int-1 | -64.8  | -36.1 | -24.6 | 6.6   | 21.9  | 1.70 | 1.96 | 2.35 | 1.02 | 1.40 | 1.11 | 2.87 |
|                  | TS-2  | 3.8    | 36.5  | 32.4  | 52.4  | 59.0  | 1.69 | 2.03 | 2.41 | 1.02 | 1.31 | 1.44 | 1.62 |
|                  | P     | -94.3  | -64.3 | -62.9 | -58.3 | -58.5 | 1.72 | 2.25 | 1.67 | 1.05 | 1.24 | 3.32 | 1.36 |

**Table S4-A.** B3LYP transition state energies (kJ/mol) and distances (Å) for initial proton transfer and a subsequent stepwise reaction (Fig. 1, Reaction 4) for negatively charged xanthine. All energy contributions are given relative to the sum of the MoCo and substrate energies.

|          | BS1   | BS2   | ZPE   | $\epsilon=4$ | $\epsilon=80$ | Mo – O | O – H <sub>MoCo</sub> | H <sub>MoCo</sub> – N | O – C | C – H <sub>Sub</sub> | H <sub>Sub</sub> – S |
|----------|-------|-------|-------|--------------|---------------|--------|-----------------------|-----------------------|-------|----------------------|----------------------|
| Reactant | 123.1 | 141.5 | 145.6 | 43.8         | -3.5          | 1.88   | 1.01                  | 1.81                  | 3.36  | 1.09                 | 2.87                 |
| TS1      | 140.9 | 168.1 | 164.5 | 47.3         | -7.3          | 1.79   | 1.33                  | 1.18                  | 3.09  | 1.10                 | 2.53                 |
| Interm 1 | 140.1 | 166.6 | 170.8 | 49.7         | -6.8          | 1.77   | 1.50                  | 1.10                  | 3.07  | 1.11                 | 2.40                 |
| TS2      | 185.3 | 210.5 | 217.4 | 109.6        | 62.0          | 1.83   | 2.87                  | 1.01                  | 1.81  | 1.11                 | 2.29                 |
| Interm 2 | 168.6 | 195.4 | 104.0 | 106.9        | 66.0          | 1.93   | 2.69                  | 1.01                  | 1.44  | 1.12                 | 2.44                 |
| TS3      | 193.3 | 228.9 | 223.5 | 123.3        | 80.1          | 2.00   | 2.68                  | 1.01                  | 1.36  | 1.33                 | 1.70                 |
| Product  | 92.2  | 123.8 | 125.1 | 19.6         | -26.8         | 2.18   | 2.68                  | 1.01                  | 1.24  | 2.92                 | 1.37                 |

**Table S4-B.** B3LYP-D3 transition state energies (kJ/mol) and distances (Å) for initial proton transfer and a subsequent stepwise reaction (Fig. 1, Reaction 4) for negatively charged xanthine. All energy contributions are given relative to the sum of the MoCo and substrate energies.

|          | BS1   | BS2   | ZPE   | $\epsilon=4$ | $\epsilon=80$ | Mo – O | O – H <sub>MoCo</sub> | H <sub>MoCo</sub> – N | O – C | C – H <sub>Sub</sub> | H <sub>Sub</sub> – S |
|----------|-------|-------|-------|--------------|---------------|--------|-----------------------|-----------------------|-------|----------------------|----------------------|
| Reactant | 105.2 | 124.9 | 129.1 | 25.9         | -21.9         | 1.88   | 1.01                  | 1.73                  | 3.35  | 1.09                 | 2.84                 |
| TS1      | 122.0 | 149.3 | 145.9 | 28.3         | -26.5         | 1.79   | 1.33                  | 1.18                  | 3.10  | 1.10                 | 2.51                 |
| Interm 1 | 121.1 | 147.9 | 152.1 | 31.1         | -25.4         | 1.78   | 1.50                  | 1.10                  | 3.08  | 1.11                 | 2.40                 |
| TS2      | 165.2 | 190.2 | 197.0 | 89.5         | 42.1          | 1.82   | 2.84                  | 1.01                  | 1.81  | 1.11                 | 2.29                 |
| Interm 2 | 146.6 | 172.5 | 181.7 | 84.2         | 43.1          | 1.92   | 2.65                  | 1.01                  | 1.44  | 1.12                 | 2.48                 |
| TS3      | 173.6 | 208.9 | 203.4 | 103.0        | 59.6          | 2.00   | 2.78                  | 1.01                  | 1.36  | 1.33                 | 1.69                 |
| Product  | 122.3 | 155.7 | 159.0 | 57.2         | 13.2          | 2.24   | 2.66                  | 1.01                  | 1.25  | 3.31                 | 1.36                 |

**Table S5-A.** B3LYP transition state energies (kJ/mol) and distances (Å) for concerted reaction (Fig. 1, Reaction 1) for 6-substituted quinazolines. All energy contributions are given relative to the sum of the MoCo and substrate energies.

|                                       | BS1   | BS2   | ZPE   | $\epsilon=4$ | $\epsilon=80$ | Mo – O | O – C | C – H | H – S |
|---------------------------------------|-------|-------|-------|--------------|---------------|--------|-------|-------|-------|
| 6-NO <sub>2</sub> -Quinazoline (C2)** | 88.3  | 117.1 | 110.4 | 143.1        | 154.7         | 2.19   | 1.45  | 1.40  | 1.59  |
| 6-NO <sub>2</sub> -Quinazoline (C4)*  | 85.2  | 113.4 | 107.3 | 142.8        | 158.4         | 2.20   | 1.45  | 1.39  | 1.59  |
| 6-NH <sub>2</sub> -Quinazoline (C2)** | 148.7 | 176.8 | 169.9 | 178.9        | 174.8         | 2.17   | 1.48  | 1.34  | 1.65  |
| 6-NH <sub>2</sub> -Quinazoline (C4)*  | 116.4 | 142.9 | 137.3 | 161.0        | 170.7         | 2.17   | 1.49  | 1.34  | 1.66  |

**Table S5-B.** B3LYP-D3 transition state energies (kJ/mol) and distances (Å) for concerted reaction (Fig. 1, Reaction 1) for 6-substituted quinazolines. All energy contributions are given relative to the sum of the MoCo and substrate energies.

|                                       | BS1   | BS2   | ZPE   | $\epsilon=4$ | $\epsilon=80$ | Mo – O | O – C | C – H | H – S |
|---------------------------------------|-------|-------|-------|--------------|---------------|--------|-------|-------|-------|
| 6-NO <sub>2</sub> -Quinazoline (C2)** | 66.4  | 95.0  | 88.4  | 121.0        | 132.4         | 2.19   | 1.45  | 1.39  | 1.59  |
| 6-NO <sub>2</sub> -Quinazoline (C4)*  | 54.1  | 82.1  | 76.1  | 111.4        | 126.8         | 2.20   | 1.45  | 1.39  | 1.60  |
| 6-NH <sub>2</sub> -Quinazoline (C2)** | 127.3 | 155.3 | 148.4 | 158.3        | 154.8         | 2.17   | 1.48  | 1.33  | 1.67  |
| 6-NH <sub>2</sub> -Quinazoline (C4)*  | 85.0  | 111.3 | 106.0 | 130.1        | 140.2         | 2.17   | 1.49  | 1.33  | 1.66  |

**Table S6-A.** B3LYP transition state energies (kJ/mol) and distances (Å) for concerted reaction (Fig. 1, reaction 1) for quinazoline. All energy contributions are given relative to the sum of the MoCo and substrate energies.

|      |          | BS1   | BS2   | ZPE   | $\epsilon=4$ | $\epsilon=80$ | Mo – O | O – C | C – H | H – S |
|------|----------|-------|-------|-------|--------------|---------------|--------|-------|-------|-------|
| C2** | Reactant | -4.9  | 1.1   | 2.2   | 9.3          | 9.6           | 1.94   | 2.93  | 1.10  | 2.86  |
|      | TS       | 131.0 | 161.5 | 154.2 | 169.5        | 170.8         | 2.17   | 1.47  | 1.36  | 1.63  |
|      | Product  | 44.5  | 69.6  | 68.9  | 61.9         | 53.2          | 2.43   | 1.34  | 2.90  | 1.36  |
| C4*  | Reactant | -40.1 | -29.5 | -26.3 | -2.0         | 9.6           | 1.97   | 3.38  | 1.10  | 4.39  |
|      | TS       | 109.4 | 137.8 | 131.9 | 157.8        | 169.2         | 2.18   | 1.48  | 1.35  | 1.64  |
|      | Product  | 25.1  | 48.0  | 49.2  | 56.1         | 57.5          | 2.40   | 1.35  | 2.83  | 1.36  |
| C5   | Reactant | -43.0 | -32.2 | -29.5 | -4.3         | 7.5           | 1.96   | 3.25  | 1.09  | 2.98  |
|      | TS       | 151.6 | 178.2 | 169.2 | 188.3        | 193.3         | 2.17   | 1.49  | 1.38  | 1.60  |
|      | Product  | 69.4  | 90.4  | 89.7  | 95.6         | 95.6          | 2.39   | 1.36  | 2.80  | 1.36  |
| C6   | Reactant | -36.0 | -28.3 | -25.9 | -4.3         | 7.5           | 1.96   | 3.16  | 1.09  | 3.81  |
|      | TS       | 156.9 | 182.4 | 172.3 | 191.3        | 195.7         | 2.16   | 1.50  | 1.39  | 1.61  |
|      | Product  | 65.2  | 84.7  | 83.4  | 86.8         | 85.6          | 2.37   | 1.36  | 2.82  | 1.36  |
| C7   | Reactant | -35.9 | -27.7 | -25.1 | -1.6         | 9.7           | 1.96   | 3.21  | 1.09  | 4.24  |
|      | TS       | 150.2 | 174.0 | 164.6 | 185.2        | 191.5         | 2.16   | 1.50  | 1.38  | 1.60  |
|      | Product  | 61.6  | 80.8  | 79.5  | 82.3         | 80.7          | 2.36   | 1.36  | 2.85  | 1.36  |
| C8   | Reactant | -40.0 | -30.5 | -28.0 | -4.0         | 7.3           | 1.95   | 4.38  | 1.09  | 6.54  |
|      | TS       | 170.6 | 201.1 | 191.1 | 202.2        | 199.3         | 2.18   | 1.48  | 1.38  | 1.60  |
|      | Product  | 40.9  | 60.3  | 58.0  | 84.7         | 95.1          | 4.55   | 1.33  | 5.81  | 1.36  |

**Table S6-B.** B3LYP-D3 transition state energies (kJ/mol) and distances (Å) for concerted reaction (Fig. 1, Reaction 1) for quinazoline. All energy contributions are given relative to the sum of the MoCo and substrate energies.

|      |          | BS1   | BS2   | ZPE   | $\epsilon=4$ | $\epsilon=80$ | Mo – O | O – C | C – H | H – S |
|------|----------|-------|-------|-------|--------------|---------------|--------|-------|-------|-------|
| C2** | Reactant | -31.2 | -20.4 | -19.5 | -8.2         | -4.4          | 1.94   | 3.27  | 1.10  | 3.43  |
|      | TS       | 109.5 | 139.9 | 132.6 | 148.2        | 149.7         | 2.17   | 1.47  | 1.35  | 1.64  |
|      | Product  | 24.5  | 49.8  | 49.2  | 40.4         | 30.2          | 2.38   | 1.34  | 2.76  | 1.36  |
| C4*  | Reactant | -56.3 | -48.5 | -46.7 | -23.1        | -12.0         | 1.94   | 2.95  | 1.10  | 2.86  |
|      | TS       | 79.5  | 107.7 | 101.7 | 127.5        | 138.7         | 2.18   | 1.48  | 1.35  | 1.64  |
|      | Product  | -5.2  | 18.1  | 19.7  | 26.4         | 27.6          | 2.39   | 1.35  | 2.69  | 1.36  |
| C5   | Reactant | -65.1 | -51.9 | -48.1 | -23.3        | -12.1         | 1.96   | 3.33  | 1.09  | 3.63  |
|      | TS       | 120.4 | 147.5 | 138.5 | 155.9        | 159.9         | 2.17   | 1.49  | 1.38  | 1.60  |
|      | Product  | 37.8  | 58.8  | 58.9  | 62.6         | 61.0          | 2.35   | 1.36  | 2.62  | 1.36  |
| C6   | Reactant | -50.6 | -44.7 | -43.2 | -18.6        | -7.0          | 1.94   | 3.03  | 1.09  | 3.01  |
|      | TS       | 132.4 | 158.1 | 147.9 | 166.0        | 169.9         | 2.15   | 1.50  | 1.38  | 1.60  |
|      | Product  | 41.0  | 60.3  | 59.0  | 61.4         | 59.6          | 2.34   | 1.36  | 2.71  | 1.36  |
| C7   | Reactant | -53.2 | -46.2 | -43.9 | -19.2        | -7.6          | 1.95   | 3.12  | 1.09  | 3.27  |
|      | TS       | 125.5 | 149.0 | 139.7 | 159.6        | 165.4         | 2.16   | 1.49  | 1.38  | 1.60  |
|      | Product  | 35.5  | 53.7  | 52.5  | 53.0         | 50.0          | 2.32   | 1.36  | 2.87  | 1.37  |
| C8   | Reactant | -51.2 | -39.5 | -37.5 | -18.2        | -10.6         | 1.94   | 3.27  | 1.09  | 3.53  |
|      | TS       | 143.0 | 173.7 | 163.7 | 173.6        | 170.0         | 2.17   | 1.48  | 1.38  | 1.60  |
|      | Product  | 12.2  | 34.2  | 32.8  | 58.3         | 69.7          | 4.24   | 1.34  | 4.79  | 1.36  |

**Table S7-A.** B3LYP transition state energies (kJ/mol) and distances (Å) for concerted reaction (Fig. 1, Reaction 1) for phthalazine. All energy contributions are given relative to the sum of the MoCo and substrate energies.

|                   | BS1   | BS2   | ZPE   | $\epsilon=4$ | $\epsilon=80$ | Mo – O | O – C | C – H | H – S |
|-------------------|-------|-------|-------|--------------|---------------|--------|-------|-------|-------|
| Phthalazine (C4)* | 126.7 | 158.6 | 152.1 | 179.1        | 189.9         | 2.18   | 1.47  | 1.32  | 1.68  |
| Phthalazine (C5)  | 146.0 | 170.7 | 161.1 | 184.1        | 191.8         | 2.17   | 1.49  | 1.40  | 1.59  |
| Phthalazine (C6)  | 150.5 | 177.6 | 168.3 | 188.6        | 193.1         | 2.16   | 1.50  | 1.40  | 1.59  |

**Table S7-B.** B3LYP-D3 transition state energies (kJ/mol) and distances (Å) for concerted reaction (Fig. 1, Reaction 1) for phthalazine. All energy contributions are given relative to the sum of the MoCo and substrate energies.

|                   | BS1  | BS2   | ZPE   | $\epsilon=4$ | $\epsilon=80$ | Mo – O | O – C | C – H | H – S |
|-------------------|------|-------|-------|--------------|---------------|--------|-------|-------|-------|
| Phthalazine (C4)* | 70.1 | 101.8 | 95.6  | 123.1        | 134.3         | 2.19   | 1.48  | 1.31  | 1.69  |
| Phthalazine (C5)  | 94.8 | 119.4 | 109.7 | 133.4        | 141.6         | 2.17   | 1.48  | 1.39  | 1.59  |
| Phthalazine (C6)  | 93.4 | 120.8 | 111.5 | 131.0        | 135.0         | 2.16   | 1.50  | 1.38  | 1.60  |

**Table S8-A.** B3LYP transition state energies (kJ/mol) and distances (Å) for concerted reaction (Fig. 1, Reaction 1) for quinoline. All energy contributions are given relative to the sum of the MoCo and substrate energies.

|                 | BS1   | BS2   | ZPE   | $\epsilon=4$ | $\epsilon=80$ | Mo – O | O – C | C – H | H – S |
|-----------------|-------|-------|-------|--------------|---------------|--------|-------|-------|-------|
| Quinoline (C2)* | 137.4 | 163.8 | 156.2 | 175.4        | 180.5         | 2.15   | 1.51  | 1.33  | 1.67  |
| Quinoline (C3)  | 168.0 | 193.3 | 183.2 | 197.6        | 198.6         | 2.16   | 1.51  | 1.38  | 1.60  |
| Quinoline (C4)  | 149.9 | 176.0 | 167.1 | 183.5        | 188.0         | 2.16   | 1.49  | 1.40  | 1.59  |
| Quinoline (C5)  | 160.5 | 187.8 | 178.6 | 192.9        | 194.9         | 2.16   | 1.50  | 1.36  | 1.63  |
| Quinoline (C6)  | 167.6 | 192.8 | 182.5 | 196.0        | 196.2         | 2.15   | 1.51  | 1.37  | 1.61  |
| Quinoline (C7)  | 168.7 | 193.2 | 183.0 | 195.8        | 195.8         | 2.15   | 1.51  | 1.37  | 1.62  |
| Quinoline (C8)  | 182.2 | 212.7 | 202.4 | 205.7        | 197.6         | 2.17   | 1.48  | 1.39  | 1.60  |

**Table S8-B.** B3LYP-D3 transition state energies (kJ/mol) and distances (Å) for concerted reaction (Fig. 1, Reaction 1) for quinoline. All energy contributions are given relative to the sum of the MoCo and substrate energies.

|                 | BS1   | BS2   | ZPE   | $\epsilon=4$ | $\epsilon=80$ | Mo – O | O – C | C – H | H – S |
|-----------------|-------|-------|-------|--------------|---------------|--------|-------|-------|-------|
| Quinoline (C2)* | 113.9 | 140.0 | 132.4 | 152.1        | 157.6         | 2.15   | 1.51  | 1.32  | 1.68  |
| Quinoline (C3)  | 144.1 | 169.3 | 159.4 | 173.7        | 174.7         | 2.16   | 1.51  | 1.37  | 1.61  |
| Quinoline (C4)  | 118.5 | 144.7 | 135.9 | 151.4        | 155.5         | 2.16   | 1.49  | 1.39  | 1.59  |
| Quinoline (C5)  | 128.4 | 155.7 | 146.5 | 160.5        | 162.4         | 2.16   | 1.50  | 1.36  | 1.63  |
| Quinoline (C6)  | 143.1 | 168.4 | 158.0 | 170.6        | 170.2         | 2.15   | 1.51  | 1.37  | 1.62  |
| Quinoline (C7)  | 144.1 | 168.3 | 158.0 | 170.8        | 170.9         | 2.15   | 1.51  | 1.36  | 1.62  |
| Quinoline (C8)  | 154.4 | 184.9 | 174.9 | 178.3        | 170.3         | 2.17   | 1.48  | 1.37  | 1.61  |

**Table S9-A.** B3LYP transition state energies (kJ/mol) and distances (Å) for concerted reaction (Fig. 1, reaction 1) for 2-amino-9-methylpurine. All energy contributions are given relative to the sum of the MoCo and substrate energies.

|                    | BS1   | BS2   | ZPE   | $\epsilon=4$ | $\epsilon=80$ | Mo – O | O – C | C – H | H – S |
|--------------------|-------|-------|-------|--------------|---------------|--------|-------|-------|-------|
| Famciclovir (C6)*  | 149.0 | 176.8 | 172.0 | 179.5        | 177.1         | 2.18   | 1.48  | 1.38  | 1.60  |
| Famciclovir (C8)** | 127.1 | 157.0 | 151.9 | 172.5        | 179.9         | 2.21   | 1.46  | 1.38  | 1.61  |

**Table S9-B.** B3LYP-D3 transition state energies (kJ/mol) and distances (Å) for concerted reaction (Fig. 1, Reaction 1) for 2-amino-9-methylpurine. All energy contributions are given relative to the sum of the MoCo and substrate energies.

|                    | BS1   | BS2   | ZPE   | $\epsilon=4$ | $\epsilon=80$ | Mo – O | O – C | C – H | H – S |
|--------------------|-------|-------|-------|--------------|---------------|--------|-------|-------|-------|
| Famciclovir (C6)*  | 125.9 | 153.5 | 148.8 | 156.8        | 154.8         | 2.17   | 1.48  | 1.36  | 1.61  |
| Famciclovir (C8)** | 97.1  | 127.3 | 122.5 | 144.1        | 152.2         | 2.21   | 1.46  | 1.38  | 1.61  |



**Table S10-A.** B3LYP transition state energies (kJ/mol) and distances (Å) for concerted reaction (Fig. 1, Reaction 1) for 4-methylacridine. All energy contributions are given relative to the sum of the MoCo and substrate energies.

|            | BS1   | BS2   | ZPE   | $\epsilon=4$ | $\epsilon=80$ | Mo – O | O – C | C – H | H – S |
|------------|-------|-------|-------|--------------|---------------|--------|-------|-------|-------|
| DACA (C1)  | 153.7 | 181.9 | 172.5 | 189.5        | 191.4         | 2.17   | 1.49  | 1.36  | 1.63  |
| DACA (C2)  | 158.8 | 186.0 | 176.1 | 190.6        | 190.1         | 2.17   | 1.49  | 1.37  | 1.62  |
| DACA (C3)  | 160.0 | 188.7 | 178.7 | 192.3        | 191.4         | 2.17   | 1.49  | 1.37  | 1.62  |
| DACA (C5)  | 169.4 | 201.0 | 190.0 | 203.2        | 200.7         | 2.18   | 1.47  | 1.36  | 1.63  |
| DACA (C6)  | 157.5 | 183.9 | 173.9 | 187.6        | 187.1         | 2.17   | 1.49  | 1.38  | 1.61  |
| DACA (C7)  | 159.1 | 186.2 | 176.1 | 191.0        | 191.0         | 2.17   | 1.50  | 1.37  | 1.62  |
| DACA (C8)  | 151.5 | 179.4 | 170.0 | 188.5        | 191.9         | 2.17   | 1.49  | 1.36  | 1.63  |
| DACA (C9)* | 130.6 | 162.1 | 153.7 | 174.6        | 180.2         | 2.19   | 1.47  | 1.42  | 1.58  |

**Table S10-B.** B3LYP-D3 transition state energies (kJ/mol) and distances (Å) for concerted reaction (Fig. 1, Reaction 1) for 4-methylacridine. All energy contributions are given relative to the sum of the MoCo and substrate energies.

|            | BS1   | BS2   | ZPE   | $\epsilon=4$ | $\epsilon=80$ | Mo – O | O – C | C – H | H – S |
|------------|-------|-------|-------|--------------|---------------|--------|-------|-------|-------|
| DACA (C1)  | 120.0 | 148.5 | 139.3 | 156.0        | 157.7         | 2.17   | 1.49  | 1.35  | 1.64  |
| DACA (C2)  | 133.6 | 160.6 | 150.8 | 166.1        | 166.0         | 2.17   | 1.49  | 1.36  | 1.62  |
| DACA (C3)  | 128.6 | 157.0 | 146.8 | 160.3        | 159.3         | 2.16   | 1.49  | 1.37  | 1.62  |
| DACA (C5)  | 122.0 | 158.6 | 152.0 | 175.8        | 179.6         | 2.23   | 1.45  | 1.27  | 1.75  |
| DACA (C6)  | 132.5 | 158.7 | 148.7 | 163.2        | 163.2         | 2.16   | 1.49  | 1.37  | 1.62  |
| DACA (C7)  | 134.3 | 161.2 | 151.2 | 166.4        | 166.4         | 2.17   | 1.49  | 1.37  | 1.62  |
| DACA (C8)  | 117.9 | 146.1 | 136.9 | 154.8        | 157.9         | 2.17   | 1.49  | 1.35  | 1.63  |
| DACA (C9)* | 90.2  | 121.6 | 113.6 | 134.0        | 139.5         | 2.18   | 1.46  | 1.40  | 1.58  |

**Table S11-A.** B3LYP transition state energies (kJ/mol) and distances (Å) for concerted reaction (Fig. 1, Reaction 1) for phenanthridine. All energy contributions are given relative to the sum of the MoCo and substrate energies.

|                      | BS1   | BS2   | ZPE   | $\epsilon=4$ | $\epsilon=80$ | Mo – O | O – C | C – H | H – S |
|----------------------|-------|-------|-------|--------------|---------------|--------|-------|-------|-------|
| Phenanthridine (C1)  | 170.1 | 200.2 | 190.7 | 205.3        | 207.0         | 2.18   | 1.52  | 1.39  | 1.62  |
| Phenanthridine (C2)  | 166.4 | 193.2 | 182.3 | 193.6        | 191.7         | 2.16   | 1.50  | 1.39  | 1.50  |
| Phenanthridine (C3)  | 171.6 | 197.6 | 186.9 | 197.1        | 193.7         | 2.15   | 1.51  | 1.38  | 1.60  |
| Phenanthridine (C4)  | 183.9 | 214.7 | 203.9 | 208.0        | 199.5         | 2.17   | 1.48  | 1.38  | 1.60  |
| Phenanthridine (C6)* | 127.6 | 157.6 | 150.7 | 174.6        | 181.7         | 2.17   | 1.50  | 1.31  | 1.68  |
| Phenanthridine (C7)  | 163.5 | 190.6 | 180.7 | 195.4        | 195.3         | 2.17   | 1.50  | 1.39  | 1.60  |
| Phenanthridine (C8)  | 164.1 | 189.9 | 179.6 | 194.2        | 194.4         | 2.16   | 1.51  | 1.38  | 1.60  |
| Phenanthridine (C9)  | 155.8 | 181.6 | 171.3 | 186.7        | 188.5         | 2.16   | 1.50  | 1.40  | 1.59  |
| Phenanthridine (C10) | 167.8 | 198.1 | 188.7 | 204.2        | 206.0         | 2.18   | 1.51  | 1.39  | 1.61  |

**Table S11-B.** B3LYP-D3 transition state energies (kJ/mol) and distances (Å) for concerted reaction (Fig. 1, Reaction 1) for phenanthridine. All energy contributions are given relative to the sum of the MoCo and substrate energies.

|                      | BS1   | BS2   | ZPE   | $\epsilon=4$ | $\epsilon=80$ | Mo – O | O – C | C – H | H – S |
|----------------------|-------|-------|-------|--------------|---------------|--------|-------|-------|-------|
| Phenanthridine (C1)  | 129.9 | 160.0 | 150.4 | 165.4        | 167.3         | 2.16   | 1.52  | 1.38  | 1.62  |
| Phenanthridine (C2)  | 141.2 | 167.9 | 157.3 | 169.2        | 167.6         | 2.15   | 1.50  | 1.38  | 1.61  |
| Phenanthridine (C3)  | 146.8 | 172.6 | 162.0 | 172.1        | 168.6         | 2.15   | 1.50  | 1.38  | 1.61  |
| Phenanthridine (C4)  | 155.4 | 186.5 | 175.2 | 178.8        | 170.1         | 2.16   | 1.48  | 1.37  | 1.61  |
| Phenanthridine (C6)* | 96.2  | 126.0 | 119.4 | 143.7        | 151.1         | 2.18   | 1.50  | 1.31  | 1.69  |
| Phenanthridine (C7)  | 131.9 | 159.1 | 149.2 | 163.3        | 162.8         | 2.16   | 1.49  | 1.38  | 1.60  |
| Phenanthridine (C8)  | 139.4 | 164.9 | 154.6 | 168.8        | 168.7         | 2.16   | 1.50  | 1.38  | 1.60  |
| Phenanthridine (C9)  | 130.4 | 156.0 | 145.7 | 161.1        | 163.0         | 2.15   | 1.50  | 1.39  | 1.59  |
| Phenanthridine (C10) | 128.0 | 158.3 | 148.7 | 164.7        | 166.8         | 2.17   | 1.51  | 1.38  | 1.61  |

**Table S12-A.** DFT calculated molecular properties for quinazoline. All energies (kJ/mol) are calculated at the B3LYP level of theory using BS1 and given relative to the sum of the substrate and MoCo energies.

| Position | Cation intermediate | Intermediate | Product | ESP charges | NBO charges |
|----------|---------------------|--------------|---------|-------------|-------------|
| C2 **    | 1179.3              | 259.7        | 52.5    | 0.90        | 0.30        |
| C4 *     | 1174.5              | 228.3        | 46.3    | 0.63        | 0.13        |
| C5       | 1281.4              | 270.1        | 98.4    | 0.12        | -0.19       |
| C6       | 1309.7              | 299.0        | 102.0   | 0.00        | -0.22       |
| C7       | 1306.5              | 275.3        | 98.8    | 0.15        | -0.20       |
| C8       | 1307.9              | 292.8        | 110.7   | 0.12        | -0.20       |

**Table S12-B.** DFT calculated molecular properties for 2-amino-9-methylpurine. All energies (kJ/mol) are calculated at the B3LYP level of theory using BS1 and given relative to the substrate energy.

| Position | Cation intermediate | Intermediate | Product | ESP charges | NBO charges |
|----------|---------------------|--------------|---------|-------------|-------------|
| C6 *     | 1139.2              | 285.8        | 60.6    | 0.37        | 0.12        |
| C8 **    | 1296.7              | 267.4        | 70.8    | 0.42        | 0.27        |

**Table 12-C.** DFT calculated molecular properties for 4-methylacridine. All energies (kJ/mol) are calculated at the B3LYP level of theory using BS1 and given relative to the substrate energy.

| Position | Cation intermediate | Intermediate | Product | ESP charges | NBO charges |
|----------|---------------------|--------------|---------|-------------|-------------|
| C1       | 1217.8              | 290.1        | 99.4    | 0.05        | -0.20       |
| C2       | 1234.4              | 292.6        | 101.2   | 0.03        | -0.21       |
| C3       | 1217.5              | 305.9        | 103.1   | 0.09        | -0.22       |
| C5       | 1247.7              | 283.9        | 109.8   | -0.11       | -0.20       |
| C6       | 1238.1              | 280.0        | 101.6   | 0.13        | -0.22       |
| C7       | 1250.6              | 316.2        | 102.4   | 0.03        | -0.22       |
| C8       | 1222.4              | 283.9        | 97.8    | 0.06        | -0.19       |
| C9 *     | 1221.8              | 214.0        | 94.7    | 0.11        | -0.13       |

**Table S12-D.** DFT calculated molecular properties for phenanthridine. All energies (kJ/mol) are calculated at the B3LYP level of theory using BS1 and given relative to the sum of the substrate and the MoCo energies.

| Position | Cation intermediate | Intermediate | Product | ESP charges | NBO charges |
|----------|---------------------|--------------|---------|-------------|-------------|
| C1       | 1222.8              | 302.3        | 106.7   | 0.02        | -0.20       |
| C2       | 1264.3              | 304.9        | 100.6   | 0.03        | -0.21       |
| C3       | 1257.0              | 308.6        | 102.4   | 0.12        | -0.22       |
| C4       | 1257.6              | 309.8        | 112.0   | -0.10       | -0.20       |
| C6 *     | 1132.6              | 278.6        | 86.0    | 0.48        | 0.12        |
| C7       | 1268.2              | 278.5        | 100.1   | 0.07        | -0.18       |
| C8       | 1272.0              | 299.5        | 102.6   | 0.06        | -0.22       |
| C9       | 1275.1              | 277.4        | 98.3    | 0.11        | -0.20       |
| C10      | 1262.9              | 292.1        | 107.5   | -0.08       | -0.20       |

**Table S12-E.** DFT calculated molecular properties for phthalazine. All energies (kJ/mol) are calculated at the B3LYP level of theory using BS1 and given relative to the substrate energy.

| Position | Cation intermediate | Intermediate | Product | ESP charges | NBO charges |
|----------|---------------------|--------------|---------|-------------|-------------|
| C4 *     | 1217.0              | 259.7        | 56.5    | 0.50        | 0.07        |
| C5       | 1329.7              | 275.5        | 98.8    | 0.00        | -0.19       |
| C6       | 1307.9              | 269.4        | 96.6    | 0.10        | -0.20       |

**Table S12-F.** DFT calculated molecular properties for quinoline. All energies (kJ/mol) are calculated at the B3LYP level of theory using BS1 and given relative to the substrate energy.

| Position | Cation intermediate | Intermediate | Product | ESP charges | NBO charges |
|----------|---------------------|--------------|---------|-------------|-------------|
| C2 *     | 1162.1              | 294.9        | 81.7    | 0.44        | 0.08        |
| C3       | 1262.6              | 339.1        | 103.5   | -0.48       | -0.27       |
| C4       | 1259.1              | 276.3        | 90.9    | 0.13        | -0.16       |
| C5       | 1251.1              | 323.7        | 99.1    | -0.09       | -0.20       |
| C6       | 1287.0              | 346.1        | 101.8   | -0.21       | -0.22       |
| C7       | 1274.5              | 319.6        | 102.2   | -0.01       | -0.22       |
| C8       | 1276.0              | 322.6        | 110.9   | -0.42       | -0.20       |

**Figure S1.** Reaction mechanisms of 4-quinazolinones (A) and negatively charged xanthine (B) studied in this work.

**A: Reaction 4 (4-quinazolinone)**

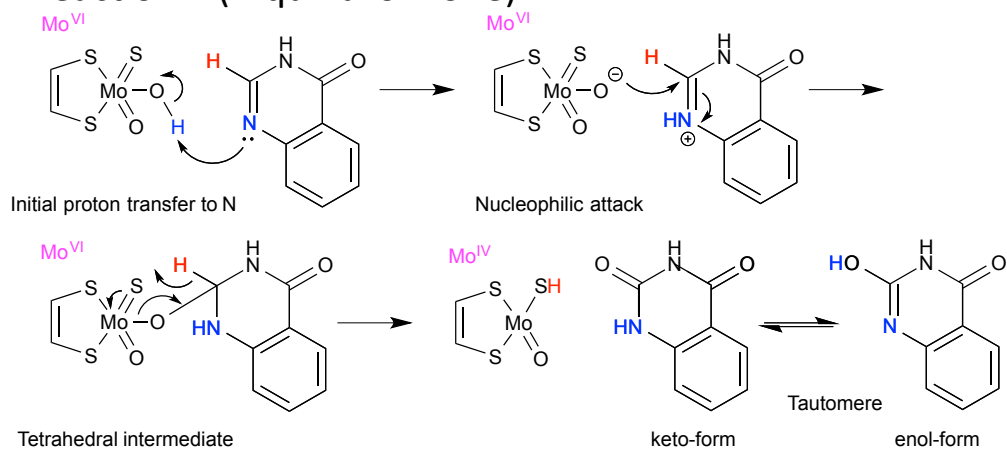

**B: Reaction 4 (xanthine)**

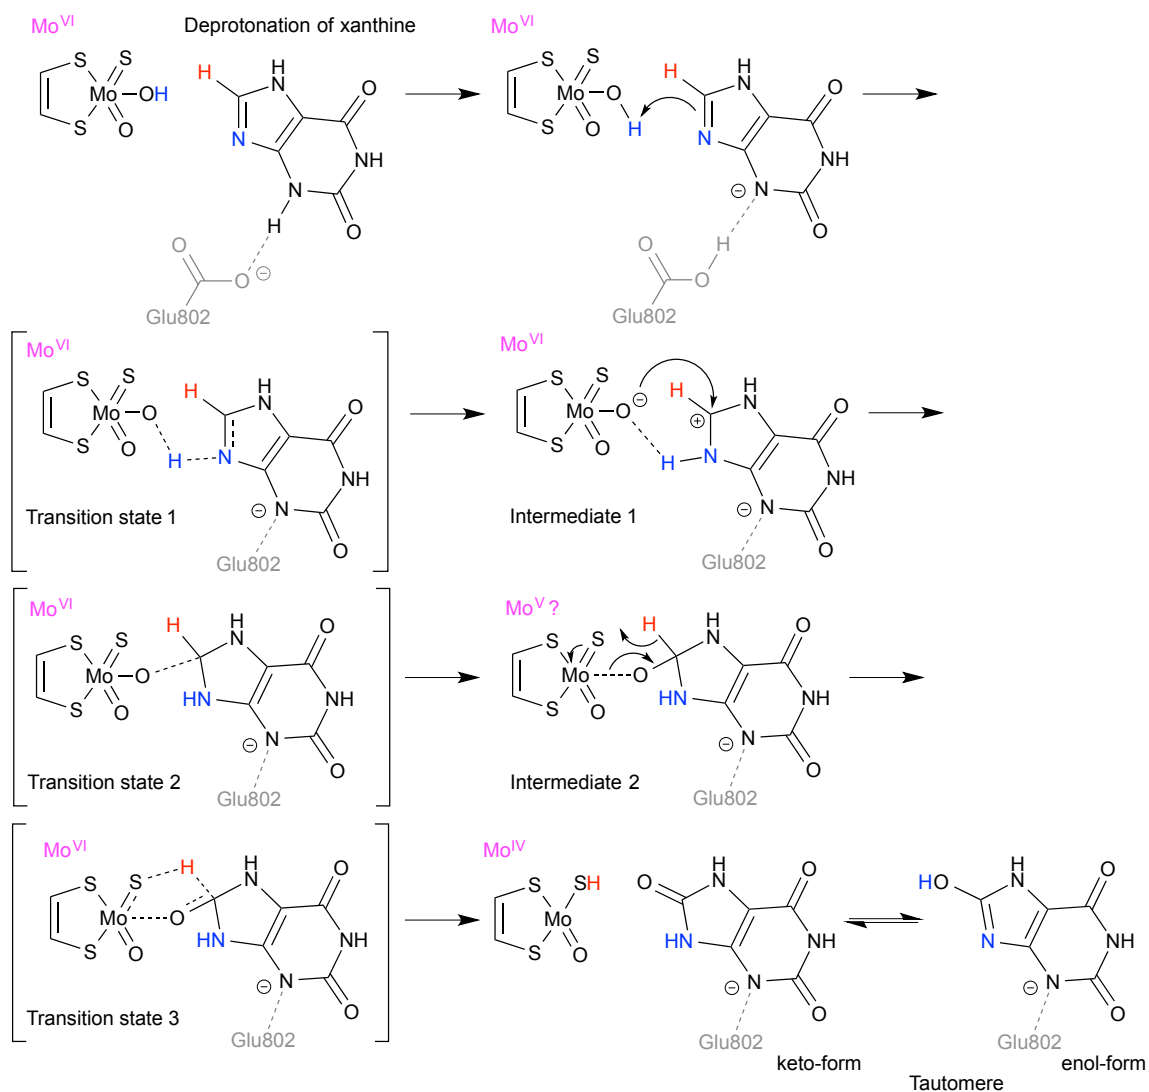

**Figure S2.** Reactions for formation of 1) the products, 2) the hydroxylated tetrahedral intermediate, and 3) the cation intermediate.

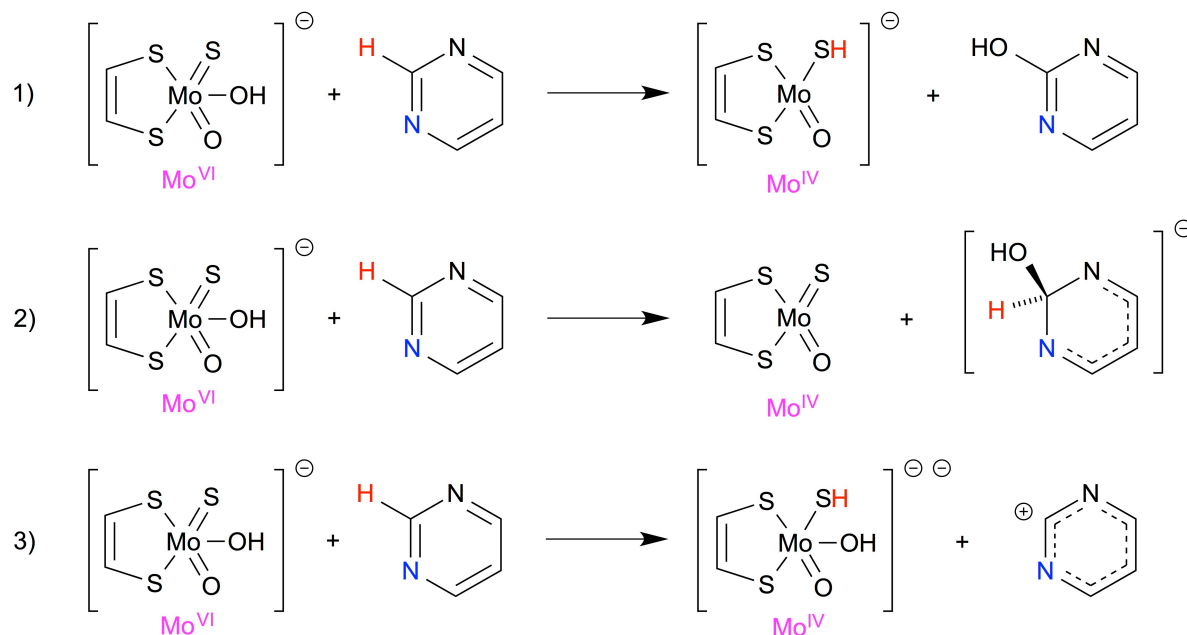

**Figure S3.** Transition state energies (at B3LYP level) versus estimates of the reactivity based on DFT calculated properties. Red and blue point show the SOMs/non-SOMs.

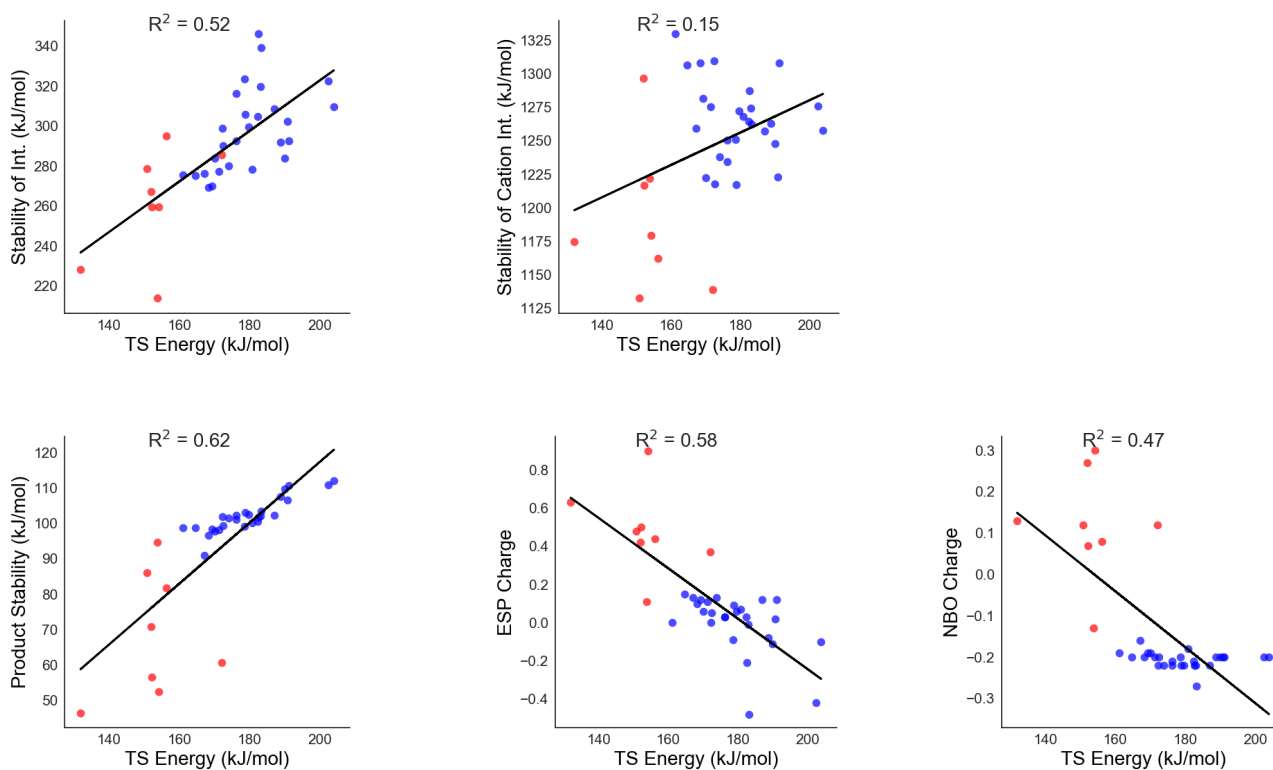

**Figure S4.** Distribution of transition state energies and reactivity based on DFT calculated properties. Red bars show the values for the SOMs and blue for the other aromatic C atoms.

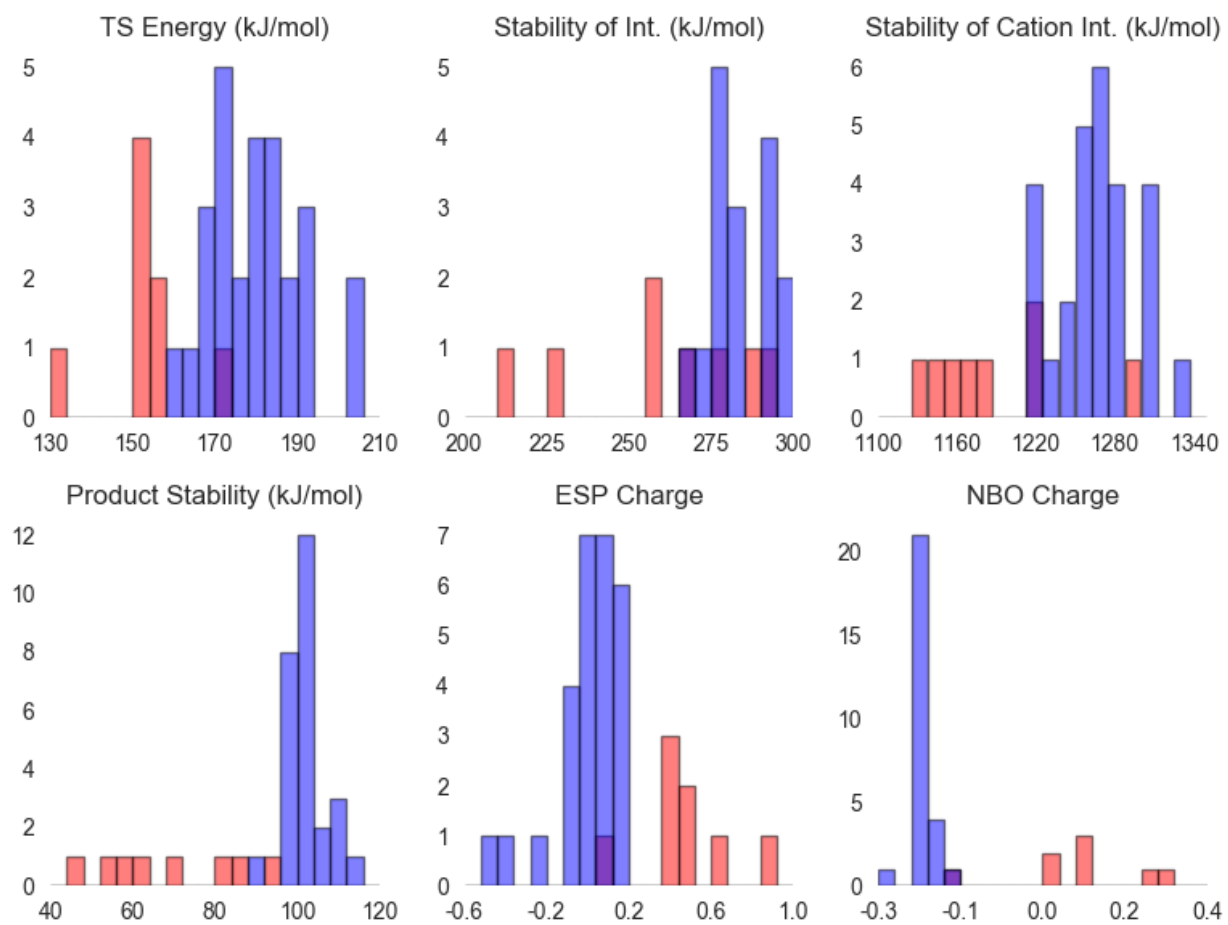

Supplement: ao7b00658_si_002.pdf [file ao7b00658_si_002.pdf]
