# Supplementary material
Source: PubMed Central journal article supplement (PMC6643718)
Supplement: ao7b00658_si_001.pdf [file ao7b00658_si_001.pdf]

*B3LYP transition state coordinates for concerted reaction mechanism between 6-substituted 4-quinazolinones and MoCo.*

**6-Nitro-4-Quinazolinone**

30

|    |           |           |           |
|----|-----------|-----------|-----------|
| Mo | 2.630849  | -0.361921 | -0.074386 |
| S  | 4.715700  | -0.259218 | 1.112403  |
| C  | 5.688300  | 0.899957  | 0.194576  |
| H  | 6.744813  | 0.967746  | 0.478730  |
| C  | 5.166178  | 1.707661  | -0.745093 |
| H  | 5.774551  | 2.446932  | -1.277167 |
| S  | 3.463049  | 1.618371  | -1.218265 |
| S  | 1.450004  | -0.778006 | 1.830611  |
| O  | 0.703207  | 0.526110  | -0.606543 |
| H  | 0.678002  | 1.501379  | -0.628569 |
| C  | -0.550491 | 0.121789  | 0.005958  |
| H  | 0.094540  | -0.265018 | 1.221905  |
| N  | -1.384348 | 1.137348  | 0.210934  |
| O  | 2.666970  | -1.742541 | -1.038864 |
| C  | -2.328120 | -1.467944 | -0.598978 |
| C  | -3.254166 | -0.378792 | -0.211527 |
| C  | -2.713981 | 0.893751  | 0.166078  |
| N  | -0.991999 | -1.092151 | -0.537577 |
| H  | -0.303473 | -1.824795 | -0.708961 |
| O  | -2.663913 | -2.583620 | -0.955301 |
| C  | -3.633910 | 1.934183  | 0.493972  |
| C  | -4.630841 | -0.592914 | -0.248227 |
| C  | -4.995495 | 1.717111  | 0.458267  |
| C  | -5.494133 | 0.448653  | 0.088693  |
| H  | -3.220928 | 2.903854  | 0.778892  |
| H  | -5.707114 | 2.503159  | 0.711073  |
| N  | -6.933861 | 0.231354  | 0.054038  |
| H  | -5.018830 | -1.567737 | -0.543534 |
| O  | -7.665129 | 1.173425  | 0.350581  |
| O  | -7.345720 | -0.877924 | -0.269009 |

---

**6-Trifluoromethyl-4-Quinazolinone**

31

|    |           |           |           |
|----|-----------|-----------|-----------|
| Mo | 3.012876  | -0.363487 | -0.083521 |
| S  | 5.111903  | -0.248844 | 1.084527  |
| C  | 6.046076  | 0.968588  | 0.203006  |
| H  | 7.101809  | 1.056989  | 0.484920  |
| C  | 5.497007  | 1.791982  | -0.707332 |
| H  | 6.081791  | 2.566146  | -1.215984 |
| S  | 3.794958  | 1.669562  | -1.175386 |
| S  | 1.862343  | -0.866018 | 1.818048  |
| O  | 1.075413  | 0.511301  | -0.561794 |
| H  | 1.036916  | 1.486128  | -0.561694 |
| C  | -0.176644 | 0.078436  | 0.061282  |
| H  | 0.487236  | -0.347689 | 1.235022  |
| N  | -1.009106 | 1.082627  | 0.306383  |
| O  | 3.068908  | -1.714295 | -1.089227 |
| C  | -1.956070 | -1.474079 | -0.641145 |
| C  | -2.880993 | -0.398522 | -0.222796 |
| C  | -2.343726 | 0.843896  | 0.230344  |
| N  | -0.620136 | -1.115886 | -0.527273 |
| H  | 0.066829  | -1.843839 | -0.721352 |
| O  | -2.293364 | -2.569827 | -1.058829 |
| C  | -3.266449 | 1.865285  | 0.596109  |
| C  | -4.262919 | -0.599022 | -0.304240 |
| C  | -4.629258 | 1.653113  | 0.513279  |
| C  | -5.144608 | 0.415278  | 0.060683  |
| H  | -2.858750 | 2.817539  | 0.941563  |
| H  | -5.320682 | 2.451765  | 0.794969  |
| C  | -6.628241 | 0.211810  | 0.007677  |
| H  | -4.620645 | -1.564098 | -0.667283 |
| F  | -7.175976 | 0.078388  | 1.239452  |
| F  | -6.976313 | -0.885565 | -0.688712 |
| F  | -7.262792 | 1.261882  | -0.563539 |

---

**6-Chloro-4-Quinazolinone**

28

|    |           |           |           |
|----|-----------|-----------|-----------|
| Mo | 2.457426  | -0.386202 | -0.106356 |
| S  | 4.549862  | -0.272528 | 1.079712  |
| C  | 5.477252  | 0.975451  | 0.235350  |
| H  | 6.527569  | 1.074069  | 0.534065  |
| C  | 4.929045  | 1.808094  | -0.667166 |
| H  | 5.509500  | 2.600479  | -1.152362 |
| S  | 3.235665  | 1.669438  | -1.161045 |
| S  | 1.302316  | -0.919331 | 1.782582  |
| O  | 0.521921  | 0.484112  | -0.586313 |
| H  | 0.488104  | 1.458890  | -0.598723 |
| C  | -0.737491 | 0.068671  | 0.052549  |
| H  | -0.075496 | -0.372384 | 1.201793  |
| N  | -1.548778 | 1.086653  | 0.302359  |
| O  | 2.533969  | -1.722135 | -1.130809 |
| C  | -2.552420 | -1.446226 | -0.649827 |
| C  | -3.455274 | -0.357358 | -0.215689 |
| C  | -2.891542 | 0.872331  | 0.236624  |
| N  | -1.210653 | -1.114305 | -0.541960 |
| H  | -0.540357 | -1.856458 | -0.738741 |
| O  | -2.914562 | -2.532994 | -1.072285 |
| C  | -3.791954 | 1.904624  | 0.617725  |
| C  | -4.843158 | -0.542814 | -0.276485 |
| C  | -5.163354 | 1.716246  | 0.558989  |
| C  | -5.689072 | 0.487733  | 0.112349  |
| H  | -3.367314 | 2.849464  | 0.963786  |
| H  | -5.847334 | 2.513394  | 0.858859  |
| Cl | -7.433716 | 0.271260  | 0.049345  |
| H  | -5.226847 | -1.500173 | -0.633191 |

**4-Quinazolinone**

28

|    |           |           |           |
|----|-----------|-----------|-----------|
| Mo | 1.810359  | -0.409713 | -0.116091 |
| S  | 3.906837  | -0.301327 | 1.067087  |
| C  | 4.834599  | 0.948807  | 0.226628  |
| H  | 5.884735  | 1.046916  | 0.526360  |
| C  | 4.287201  | 1.783489  | -0.674605 |
| H  | 4.868302  | 2.577142  | -1.157102 |
| S  | 2.594278  | 1.646428  | -1.169610 |
| S  | 0.661040  | -0.947457 | 1.773994  |
| O  | -0.118312 | 0.470053  | -0.586353 |
| H  | -0.140635 | 1.445083  | -0.607132 |
| C  | -1.384140 | 0.082472  | 0.073411  |
| H  | -0.717426 | -0.377767 | 1.202318  |
| N  | -2.160645 | 1.122663  | 0.336579  |
| O  | 1.886663  | -1.742776 | -1.144085 |
| C  | -3.253249 | -1.366983 | -0.626603 |
| C  | -4.117755 | -0.252801 | -0.184698 |
| C  | -3.512355 | 0.954416  | 0.276049  |
| N  | -1.899238 | -1.082232 | -0.520807 |
| H  | -1.256280 | -1.846523 | -0.722073 |
| O  | -3.648991 | -2.441099 | -1.053778 |
| C  | -4.372614 | 2.014840  | 0.670386  |
| C  | -5.513259 | -0.381147 | -0.239075 |
| C  | -5.750623 | 1.868385  | 0.612453  |
| C  | -6.335752 | 0.668212  | 0.158646  |
| H  | -3.909019 | 2.939309  | 1.022187  |
| H  | -6.392784 | 2.697639  | 0.925954  |
| H  | -7.423547 | 0.566281  | 0.119595  |
| H  | -5.921317 | -1.327217 | -0.603768 |

**6-Methyl-4-Quinazolinone**

31

|    |           |           |           |
|----|-----------|-----------|-----------|
| Mo | 2.096020  | -0.396125 | -0.116815 |
| S  | 4.172423  | -0.272156 | 1.100750  |
| C  | 5.091142  | 1.007528  | 0.296306  |
| H  | 6.134480  | 1.119029  | 0.614633  |
| C  | 4.543293  | 1.847660  | -0.599646 |
| H  | 5.117655  | 2.659493  | -1.059425 |
| S  | 2.860263  | 1.691028  | -1.122080 |
| S  | 0.934603  | -0.976707 | 1.751314  |
| O  | 0.156464  | 0.453874  | -0.602841 |
| H  | 0.116536  | 1.428212  | -0.623725 |
| C  | -1.108806 | 0.045655  | 0.049150  |
| H  | -0.450539 | -0.409477 | 1.171041  |
| N  | -1.900833 | 1.076630  | 0.307920  |
| O  | 2.214226  | -1.710196 | -1.165578 |
| C  | -2.957962 | -1.433388 | -0.643103 |
| C  | -3.837776 | -0.332122 | -0.200566 |
| C  | -3.249294 | 0.885066  | 0.247816  |
| N  | -1.608370 | -1.121224 | -0.557334 |
| H  | -0.955810 | -1.879498 | -0.750148 |
| O  | -3.338002 | -2.518279 | -1.058191 |
| C  | -4.132360 | 1.929863  | 0.633880  |
| C  | -5.231555 | -0.486351 | -0.243107 |
| C  | -5.505128 | 1.753960  | 0.583490  |
| C  | -6.090907 | 0.539648  | 0.147807  |
| H  | -3.690120 | 2.868852  | 0.974841  |
| H  | -6.158772 | 2.577323  | 0.892540  |
| C  | -7.591837 | 0.376083  | 0.119600  |
| H  | -5.619036 | -1.445441 | -0.598194 |
| H  | -8.077726 | 1.161999  | -0.485497 |
| H  | -7.880703 | -0.598147 | -0.303920 |
| H  | -8.028850 | 0.440089  | 1.132639  |

---

**6-Methoxy-4-Quinazolinone**

32

|    |           |           |           |
|----|-----------|-----------|-----------|
| Mo | 2.393195  | -0.368533 | -0.100980 |
| S  | 4.495626  | -0.185299 | 1.064017  |
| C  | 5.387036  | 1.069708  | 0.192445  |
| H  | 6.436146  | 1.200031  | 0.483603  |
| C  | 4.813516  | 1.871877  | -0.722082 |
| H  | 5.372196  | 2.669785  | -1.223711 |
| S  | 3.120928  | 1.684192  | -1.202243 |
| S  | 1.268082  | -0.893636 | 1.806665  |
| O  | 0.442800  | 0.444542  | -0.585617 |
| H  | 0.378159  | 1.416267  | -0.631359 |
| C  | -0.812220 | 0.016020  | 0.081426  |
| H  | -0.136814 | -0.379730 | 1.214910  |
| N  | -1.641454 | 1.023858  | 0.299118  |
| O  | 2.493626  | -1.719599 | -1.103433 |
| C  | -2.596870 | -1.543951 | -0.611601 |
| C  | -3.524455 | -0.458409 | -0.218392 |
| C  | -2.984051 | 0.788017  | 0.218301  |
| N  | -1.263567 | -1.190594 | -0.488286 |
| H  | -0.580404 | -1.927953 | -0.655724 |
| O  | -2.936520 | -2.646564 | -1.012996 |
| C  | -3.906516 | 1.805623  | 0.562755  |
| C  | -4.903962 | -0.663514 | -0.296784 |
| C  | -5.279466 | 1.597215  | 0.486078  |
| C  | -5.792335 | 0.354402  | 0.055897  |
| H  | -3.504941 | 2.764813  | 0.897267  |
| H  | -5.952242 | 2.409555  | 0.765935  |
| O  | -7.127567 | 0.066346  | -0.046148 |
| H  | -5.279486 | -1.629695 | -0.638977 |
| C  | -8.064807 | 1.047496  | 0.308145  |
| H  | -7.984521 | 1.953806  | -0.323079 |
| H  | -9.060291 | 0.604150  | 0.158601  |
| H  | -7.971332 | 1.354735  | 1.368026  |

---

**6-Amino-4-Quinazolinone**

30

|    |           |           |           |
|----|-----------|-----------|-----------|
| Mo | 2.103966  | -0.400245 | -0.120567 |
| S  | 4.208164  | -0.269566 | 1.050908  |
| C  | 5.110219  | 1.005312  | 0.220164  |
| H  | 6.159537  | 1.119568  | 0.517499  |
| C  | 4.545122  | 1.838738  | -0.671475 |
| H  | 5.110811  | 2.647372  | -1.147581 |
| S  | 2.852800  | 1.676968  | -1.161395 |
| S  | 0.975706  | -0.966554 | 1.774455  |
| O  | 0.162825  | 0.448764  | -0.578558 |
| H  | 0.121700  | 1.422378  | -0.609298 |
| C  | -1.099588 | 0.044393  | 0.098573  |
| H  | -0.422102 | -0.402338 | 1.206466  |
| N  | -1.889737 | 1.074328  | 0.353800  |
| O  | 2.197584  | -1.723142 | -1.160993 |
| C  | -2.950705 | -1.423966 | -0.622570 |
| C  | -3.831770 | -0.318591 | -0.187903 |
| C  | -3.240953 | 0.889645  | 0.278479  |
| N  | -1.603799 | -1.128800 | -0.496519 |
| H  | -0.951850 | -1.886895 | -0.691528 |
| O  | -3.336309 | -2.499895 | -1.058036 |
| C  | -4.125317 | 1.933377  | 0.657586  |
| C  | -5.222240 | -0.467928 | -0.266909 |
| C  | -5.499334 | 1.773177  | 0.582396  |
| C  | -6.080306 | 0.566719  | 0.117219  |
| H  | -3.686550 | 2.867748  | 1.015237  |
| H  | -6.156298 | 2.592701  | 0.893282  |
| N  | -7.474816 | 0.409772  | 0.101191  |
| H  | -5.609105 | -1.420000 | -0.641192 |
| H  | -7.991738 | 1.269930  | -0.055206 |
| H  | -7.800712 | -0.325453 | -0.518895 |

-----

-----

*B3LYP-D3 transition state coordinates for concerted reaction mechanism between 6-substituted 4-quinazolinones and MoCo.*

**6-Nitro-4-Quinazolinone**

30

|    |           |           |           |
|----|-----------|-----------|-----------|
| Mo | 2.611675  | -0.342779 | -0.059616 |
| S  | 4.713538  | -0.297010 | 1.106602  |
| C  | 5.701677  | 0.841623  | 0.176838  |
| H  | 6.763888  | 0.883508  | 0.445101  |
| C  | 5.187736  | 1.664907  | -0.754847 |
| H  | 5.810010  | 2.388728  | -1.292543 |
| S  | 3.476132  | 1.621301  | -1.208773 |
| S  | 1.426796  | -0.738096 | 1.844450  |
| O  | 0.701816  | 0.578993  | -0.594513 |
| H  | 0.677115  | 1.554125  | -0.602393 |
| C  | -0.552316 | 0.166768  | 0.011443  |
| H  | 0.070550  | -0.209005 | 1.228339  |
| N  | -1.397072 | 1.175986  | 0.208610  |
| O  | 2.607295  | -1.720241 | -1.027782 |
| C  | -2.304247 | -1.447424 | -0.592823 |
| C  | -3.244330 | -0.367993 | -0.209885 |
| C  | -2.722439 | 0.914269  | 0.162085  |
| N  | -0.974177 | -1.053091 | -0.535924 |
| H  | -0.272455 | -1.774730 | -0.700729 |
| O  | -2.627604 | -2.568653 | -0.943068 |
| C  | -3.657631 | 1.942472  | 0.485292  |
| C  | -4.617045 | -0.602528 | -0.246295 |
| C  | -5.015837 | 1.705090  | 0.450366  |
| C  | -5.496091 | 0.427648  | 0.086051  |
| H  | -3.259432 | 2.919379  | 0.766479  |
| H  | -5.738231 | 2.482251  | 0.700094  |
| N  | -6.933038 | 0.188110  | 0.052108  |
| H  | -4.989049 | -1.584564 | -0.538293 |
| O  | -7.679443 | 1.120085  | 0.344126  |
| O  | -7.328083 | -0.928924 | -0.265791 |

**6-Trifluoromethyl-4-Quinazolinone**

31

|    |           |           |           |
|----|-----------|-----------|-----------|
| Mo | 2.992266  | -0.341636 | -0.065740 |
| S  | 5.114225  | -0.292057 | 1.070870  |
| C  | 6.064929  | 0.903303  | 0.173840  |
| H  | 7.128672  | 0.961671  | 0.433365  |
| C  | 5.522272  | 1.746300  | -0.723407 |
| H  | 6.121807  | 2.504177  | -1.239932 |
| S  | 3.807781  | 1.676789  | -1.161451 |
| S  | 1.843005  | -0.822699 | 1.838703  |
| O  | 1.071115  | 0.569432  | -0.540083 |
| H  | 1.032382  | 1.543699  | -0.523382 |
| C  | -0.179898 | 0.126446  | 0.077832  |
| H  | 0.464938  | -0.288506 | 1.252324  |
| N  | -1.024842 | 1.123082  | 0.314673  |
| O  | 2.998957  | -1.689139 | -1.076511 |
| C  | -1.930922 | -1.450702 | -0.633347 |
| C  | -2.872007 | -0.386556 | -0.219761 |
| C  | -2.354824 | 0.865655  | 0.231913  |
| N  | -0.601414 | -1.073701 | -0.516191 |
| H  | 0.100277  | -1.788860 | -0.705858 |
| O  | -2.253738 | -2.551046 | -1.050496 |
| C  | -3.293445 | 1.875030  | 0.591111  |
| C  | -4.250087 | -0.607683 | -0.305779 |
| C  | -4.652612 | 1.642369  | 0.503443  |
| C  | -5.146055 | 0.395732  | 0.052699  |
| H  | -2.900661 | 2.833919  | 0.935437  |
| H  | -5.359652 | 2.429439  | 0.778663  |
| C  | -6.626113 | 0.172852  | -0.001038 |
| H  | -4.594489 | -1.578209 | -0.667342 |
| F  | -7.170206 | 0.026987  | 1.231498  |
| F  | -6.960843 | -0.925856 | -0.702806 |
| F  | -7.273421 | 1.219312  | -0.566087 |

### 6-Chloro-4-Quinazolinone

28

|    |           |           |           |
|----|-----------|-----------|-----------|
| Mo | 2.434197  | -0.358296 | -0.082812 |
| S  | 4.553227  | -0.315349 | 1.065421  |
| C  | 5.501617  | 0.903173  | 0.198289  |
| H  | 6.562008  | 0.967114  | 0.470286  |
| C  | 4.961035  | 1.755507  | -0.691437 |
| H  | 5.559392  | 2.526963  | -1.189048 |
| S  | 3.252057  | 1.676948  | -1.148898 |
| S  | 1.282032  | -0.865998 | 1.811399  |
| O  | 0.517405  | 0.555574  | -0.555119 |
| H  | 0.483093  | 1.529921  | -0.547560 |
| C  | -0.740603 | 0.124885  | 0.075163  |
| H  | -0.099089 | -0.300903 | 1.227518  |
| N  | -1.570853 | 1.130701  | 0.315996  |
| O  | 2.452257  | -1.693292 | -1.110031 |
| C  | -2.516098 | -1.423414 | -0.647650 |
| C  | -3.442714 | -0.352154 | -0.217559 |
| C  | -2.907770 | 0.889210  | 0.239319  |
| N  | -1.182972 | -1.066682 | -0.526831 |
| H  | -0.492257 | -1.790905 | -0.720710 |
| O  | -2.856370 | -2.514746 | -1.076357 |
| C  | -3.832261 | 1.901530  | 0.616253  |
| C  | -4.825243 | -0.567091 | -0.287599 |
| C  | -5.198962 | 1.683640  | 0.549516  |
| C  | -5.695511 | 0.444634  | 0.097770  |
| H  | -3.430032 | 2.854529  | 0.966655  |
| H  | -5.902646 | 2.464283  | 0.846975  |
| Cl | -7.434945 | 0.189751  | 0.024469  |
| H  | -5.186688 | -1.531529 | -0.648281 |

---

### 4-Quinazolinone

28

|    |           |           |           |
|----|-----------|-----------|-----------|
| Mo | 1.786094  | -0.376605 | -0.090088 |
| S  | 3.912581  | -0.350250 | 1.048775  |
| C  | 4.864241  | 0.866587  | 0.183206  |
| H  | 5.926070  | 0.923887  | 0.451375  |
| C  | 4.324912  | 1.725488  | -0.701123 |
| H  | 4.925731  | 2.496169  | -1.197150 |
| S  | 2.613620  | 1.659911  | -1.150399 |
| S  | 0.642368  | -0.886619 | 1.806828  |
| O  | -0.121687 | 0.552638  | -0.547574 |
| H  | -0.147051 | 1.527272  | -0.545142 |
| C  | -1.386508 | 0.144501  | 0.100426  |
| H  | -0.741621 | -0.301439 | 1.230816  |
| N  | -2.185646 | 1.171242  | 0.354004  |
| O  | 1.798108  | -1.706827 | -1.123532 |
| C  | -3.212069 | -1.343319 | -0.625377 |
| C  | -4.104689 | -0.249180 | -0.186978 |
| C  | -3.531707 | 0.972019  | 0.279953  |
| N  | -1.866895 | -1.028649 | -0.507644 |
| H  | -1.200542 | -1.773784 | -0.705334 |
| O  | -3.582601 | -2.423585 | -1.059720 |
| C  | -4.420543 | 2.010626  | 0.669073  |
| C  | -5.495722 | -0.411528 | -0.252186 |
| C  | -5.794287 | 1.830343  | 0.601113  |
| C  | -6.346797 | 0.616785  | 0.141350  |
| H  | -3.982360 | 2.945322  | 1.026454  |
| H  | -6.458786 | 2.642856  | 0.911926  |
| H  | -7.431479 | 0.488258  | 0.094575  |
| H  | -5.876662 | -1.367019 | -0.621757 |

---



**6-Methyl-4-Quinazolinone**

31

|    |           |           |           |
|----|-----------|-----------|-----------|
| Mo | 2.071810  | -0.374131 | -0.052425 |
| S  | 4.198511  | -0.317282 | 1.085227  |
| C  | 5.143896  | 0.889145  | 0.198520  |
| H  | 6.205393  | 0.956562  | 0.465741  |
| C  | 4.600231  | 1.729355  | -0.701016 |
| H  | 5.197460  | 2.494127  | -1.210368 |
| S  | 2.889377  | 1.647130  | -1.149747 |
| S  | 0.930090  | -0.860771 | 1.851939  |
| O  | 0.159542  | 0.531612  | -0.529215 |
| H  | 0.122454  | 1.505607  | -0.543011 |
| C  | -1.104763 | 0.117942  | 0.121117  |
| H  | -0.459471 | -0.297579 | 1.259383  |
| N  | -1.919552 | 1.137995  | 0.350515  |
| O  | 2.090488  | -1.720330 | -1.064653 |
| C  | -2.905621 | -1.404748 | -0.598605 |
| C  | -3.815394 | -0.314570 | -0.187948 |
| C  | -3.261815 | 0.917755  | 0.264717  |
| N  | -1.565926 | -1.072705 | -0.468040 |
| H  | -0.888226 | -1.811808 | -0.649251 |
| O  | -3.258225 | -2.496171 | -1.020732 |
| C  | -4.173920 | 1.946607  | 0.624629  |
| C  | -5.203860 | -0.495529 | -0.266940 |
| C  | -5.541422 | 1.743046  | 0.542042  |
| C  | -6.091525 | 0.516118  | 0.096581  |
| H  | -3.758176 | 2.895822  | 0.970559  |
| H  | -6.219771 | 2.553628  | 0.830840  |
| C  | -7.587935 | 0.326144  | 0.034522  |
| H  | -5.563182 | -1.463574 | -0.627397 |
| H  | -8.074702 | 1.122486  | -0.555802 |
| H  | -7.852974 | -0.640077 | -0.422110 |
| H  | -8.042772 | 0.353869  | 1.041403  |

---

**6-Methoxy-4-Quinazolinone**

32

|    |           |           |           |
|----|-----------|-----------|-----------|
| Mo | 2.368812  | -0.339521 | -0.068148 |
| S  | 4.496212  | -0.236082 | 1.066008  |
| C  | 5.421708  | 0.974239  | 0.163888  |
| H  | 6.482234  | 1.061837  | 0.429320  |
| C  | 4.864115  | 1.794655  | -0.745443 |
| H  | 5.449164  | 2.562276  | -1.264613 |
| S  | 3.154102  | 1.680444  | -1.191559 |
| S  | 1.237139  | -0.819378 | 1.843831  |
| O  | 0.441457  | 0.522042  | -0.560064 |
| H  | 0.380064  | 1.494006  | -0.592550 |
| C  | -0.816056 | 0.087437  | 0.096360  |
| H  | -0.167552 | -0.289174 | 1.237422  |
| N  | -1.660043 | 1.087575  | 0.297883  |
| O  | 2.405036  | -1.697517 | -1.064242 |
| C  | -2.565583 | -1.502081 | -0.611395 |
| C  | -3.512854 | -0.429388 | -0.227428 |
| C  | -2.997045 | 0.828608  | 0.207321  |
| N  | -1.240098 | -1.127888 | -0.477037 |
| H  | -0.539402 | -1.850420 | -0.637497 |
| O  | -2.887038 | -2.609565 | -1.014236 |
| C  | -3.939588 | 1.830455  | 0.543469  |
| C  | -4.887494 | -0.659904 | -0.311184 |
| C  | -5.308163 | 1.596223  | 0.462882  |
| C  | -5.795932 | 0.342085  | 0.035391  |
| H  | -3.557055 | 2.797834  | 0.876759  |
| H  | -5.996186 | 2.397191  | 0.737652  |
| O  | -7.124728 | 0.026877  | -0.070520 |
| H  | -5.244095 | -1.633893 | -0.651133 |
| C  | -8.081693 | 0.975520  | 0.320078  |
| H  | -8.039353 | 1.895974  | -0.295124 |
| H  | -9.067916 | 0.508104  | 0.181840  |
| H  | -7.974687 | 1.266390  | 1.383850  |

---

6-Amino-4-Quinazolinone

30

|    |           |           |           |
|----|-----------|-----------|-----------|
| Mo | 2.078195  | -0.371530 | -0.093105 |
| S  | 4.211850  | -0.321535 | 1.036384  |
| C  | 5.140910  | 0.918738  | 0.179799  |
| H  | 6.201932  | 0.992874  | 0.447598  |
| C  | 4.586156  | 1.774622  | -0.698066 |
| H  | 5.173464  | 2.559519  | -1.188171 |
| S  | 2.875636  | 1.682631  | -1.146116 |
| S  | 0.951116  | -0.904659 | 1.808407  |
| O  | 0.159474  | 0.529898  | -0.544131 |
| H  | 0.119946  | 1.503545  | -0.554160 |
| C  | -1.103281 | 0.111691  | 0.120438  |
| H  | -0.449096 | -0.322894 | 1.233821  |
| N  | -1.911880 | 1.130627  | 0.366107  |
| O  | 2.105325  | -1.695760 | -1.134649 |
| C  | -2.915415 | -1.389446 | -0.623413 |
| C  | -3.820427 | -0.302217 | -0.189558 |
| C  | -3.257752 | 0.918273  | 0.281253  |
| N  | -1.576603 | -1.068575 | -0.487015 |
| H  | -0.903642 | -1.808741 | -0.680338 |
| O  | -3.279380 | -2.469865 | -1.066389 |
| C  | -4.166316 | 1.941647  | 0.658297  |
| C  | -5.206383 | -0.481847 | -0.274919 |
| C  | -5.536289 | 1.750930  | 0.578292  |
| C  | -6.088694 | 0.532656  | 0.108675  |
| H  | -3.749529 | 2.884329  | 1.020402  |
| H  | -6.212483 | 2.554540  | 0.889518  |
| N  | -7.479656 | 0.344471  | 0.087987  |
| H  | -5.570073 | -1.441564 | -0.653074 |
| H  | -8.014972 | 1.192760  | -0.071747 |
| H  | -7.786950 | -0.397599 | -0.533496 |

-----  
-----

*B3LYP transition state coordinates for concerted reaction mechanism between 6-substituted 4-quinazolinones and deprotonated MoCo.*

**6-Nitro-4-Quinazolinone**

29

|    |           |           |           |
|----|-----------|-----------|-----------|
| Mo | 2.589388  | -0.413949 | -0.042533 |
| S  | 4.655561  | 0.097008  | 1.213221  |
| C  | 5.563169  | 1.180179  | 0.155749  |
| H  | 6.597424  | 1.398561  | 0.454701  |
| C  | 5.016861  | 1.773323  | -0.926155 |
| H  | 5.599100  | 2.478592  | -1.534400 |
| S  | 3.343110  | 1.519931  | -1.414935 |
| S  | 1.554071  | -0.964743 | 1.894222  |
| O  | 0.770055  | 0.124476  | -0.562014 |
| C  | -0.430792 | -0.150056 | -0.002352 |
| H  | 0.056230  | -0.582235 | 1.159301  |
| N  | -1.257575 | 0.916566  | 0.302158  |
| O  | 2.918027  | -1.847691 | -0.878473 |
| C  | -2.392199 | -1.558570 | -0.720676 |
| C  | -3.234328 | -0.438549 | -0.244694 |
| C  | -2.567104 | 0.763274  | 0.228571  |
| N  | -1.049893 | -1.297615 | -0.620160 |
| H  | -0.419150 | -2.040923 | -0.908852 |
| O  | -2.822590 | -2.615351 | -1.179884 |
| C  | -3.436013 | 1.849658  | 0.632551  |
| C  | -4.615259 | -0.532256 | -0.291634 |
| C  | -4.801622 | 1.744835  | 0.585501  |
| C  | -5.417943 | 0.545415  | 0.124046  |
| H  | -2.946722 | 2.761194  | 0.984953  |
| H  | -5.449405 | 2.565155  | 0.897164  |
| H  | -5.074824 | -1.449010 | -0.661615 |
| N  | -6.838509 | 0.449235  | 0.077775  |
| O  | -7.516873 | 1.425130  | 0.444470  |
| O  | -7.361777 | -0.600993 | -0.325502 |

---

**6-Trifluoromethyl-4-Quinazolinone**

30

|    |           |           |           |
|----|-----------|-----------|-----------|
| Mo | 2.933508  | -0.373377 | -0.090434 |
| S  | 5.091568  | -0.161175 | 1.111033  |
| C  | 6.013167  | 1.022188  | 0.180451  |
| H  | 7.067957  | 1.148549  | 0.461678  |
| C  | 5.459453  | 1.788401  | -0.782722 |
| H  | 6.057458  | 2.544773  | -1.309664 |
| S  | 3.759121  | 1.687064  | -1.233500 |
| S  | 1.944570  | -1.126035 | 1.797789  |
| O  | 1.142149  | 0.357168  | -0.443879 |
| C  | -0.062450 | -0.023584 | 0.070508  |
| H  | 0.429281  | -0.570113 | 1.163635  |
| N  | -0.935995 | 0.971662  | 0.456101  |
| O  | 3.111114  | -1.699378 | -1.128751 |
| C  | -1.949142 | -1.422435 | -0.849010 |
| C  | -2.844058 | -0.391842 | -0.286007 |
| C  | -2.241261 | 0.774551  | 0.323074  |
| N  | -0.622358 | -1.127290 | -0.680062 |
| H  | 0.045283  | -1.814151 | -1.022638 |
| O  | -2.329342 | -2.441118 | -1.430432 |
| C  | -3.168756 | 1.774734  | 0.800275  |
| C  | -4.226279 | -0.536486 | -0.380130 |
| C  | -4.531058 | 1.612281  | 0.700426  |
| C  | -5.096021 | 0.446590  | 0.108316  |
| H  | -2.734733 | 2.671883  | 1.249536  |
| H  | -5.198513 | 2.395020  | 1.075751  |
| H  | -4.604321 | -1.443239 | -0.858633 |
| C  | -6.566511 | 0.267979  | 0.081573  |
| F  | -7.237885 | 1.418606  | -0.212752 |
| F  | -6.982052 | -0.654972 | -0.816800 |
| F  | -7.100853 | -0.132968 | 1.278541  |

---

## 6-Chloro-4-Quinazolinone

27

|    |           |           |           |
|----|-----------|-----------|-----------|
| Mo | 2.366986  | -0.390097 | -0.054577 |
| S  | 4.566738  | -0.168675 | 1.073990  |
| C  | 5.472407  | 0.982401  | 0.088489  |
| H  | 6.535035  | 1.108474  | 0.339463  |
| C  | 4.899681  | 1.726440  | -0.881195 |
| H  | 5.490349  | 2.463993  | -1.442412 |
| S  | 3.188201  | 1.625734  | -1.286715 |
| S  | 1.419680  | -1.078104 | 1.876849  |
| O  | 0.587604  | 0.368537  | -0.385248 |
| C  | -0.618386 | 0.003090  | 0.159929  |
| H  | -0.116539 | -0.508880 | 1.249902  |
| N  | -1.486094 | 1.009626  | 0.513397  |
| O  | 2.486985  | -1.748866 | -1.059268 |
| C  | -2.507969 | -1.399554 | -0.757118 |
| C  | -3.398912 | -0.341413 | -0.243361 |
| C  | -2.795847 | 0.824954  | 0.357344  |
| N  | -1.182737 | -1.123466 | -0.556952 |
| H  | -0.516946 | -1.823681 | -0.875673 |
| O  | -2.892395 | -2.426032 | -1.324592 |
| C  | -3.717480 | 1.841003  | 0.800702  |
| C  | -4.786656 | -0.471611 | -0.376469 |
| C  | -5.085677 | 1.701317  | 0.667735  |
| C  | -5.626521 | 0.537166  | 0.077820  |
| H  | -3.284410 | 2.736275  | 1.254940  |
| H  | -5.761759 | 2.487356  | 1.017500  |
| H  | -5.172956 | -1.378363 | -0.847585 |
| Cl | -7.392129 | 0.382887  | -0.079989 |

---

## 4-Quinazolinone

27

|    |           |           |           |
|----|-----------|-----------|-----------|
| Mo | 1.680278  | -0.346459 | 0.062100  |
| S  | 3.893510  | -0.141995 | 1.175935  |
| C  | 4.831149  | 0.930247  | 0.133209  |
| H  | 5.899755  | 1.030179  | 0.371000  |
| C  | 4.277848  | 1.648243  | -0.867212 |
| H  | 4.891142  | 2.337069  | -1.465264 |
| S  | 2.561400  | 1.589633  | -1.260242 |
| S  | 0.716713  | -0.925760 | 2.018970  |
| O  | -0.073807 | 0.441680  | -0.312627 |
| C  | -1.296198 | 0.105136  | 0.232477  |
| H  | -0.818821 | -0.347241 | 1.345954  |
| N  | -2.166011 | 1.131161  | 0.512205  |
| O  | 1.761968  | -1.749218 | -0.884448 |
| C  | -3.169344 | -1.335119 | -0.656509 |
| C  | -4.068193 | -0.251068 | -0.219387 |
| C  | -3.475296 | 0.943110  | 0.334460  |
| N  | -1.847080 | -1.054734 | -0.439128 |
| H  | -1.177239 | -1.772417 | -0.706579 |
| O  | -3.541263 | -2.390095 | -1.180849 |
| C  | -4.400752 | 1.983816  | 0.703971  |
| C  | -5.454732 | -0.374571 | -0.373338 |
| C  | -5.766122 | 1.834987  | 0.544492  |
| C  | -6.321904 | 0.649670  | 0.004054  |
| H  | -3.969195 | 2.898154  | 1.121307  |
| H  | -6.432484 | 2.654011  | 0.844633  |
| H  | -5.823404 | -1.309745 | -0.806941 |
| H  | -7.405151 | 0.545561  | -0.116568 |

---

**6-Methyl-4-Quinazolinone**

30

|    |           |           |           |
|----|-----------|-----------|-----------|
| Mo | 2.001547  | -0.390780 | -0.046210 |
| S  | 4.225418  | -0.185764 | 1.042867  |
| C  | 5.121932  | 0.958192  | 0.040499  |
| H  | 6.190421  | 1.075115  | 0.270864  |
| C  | 4.537672  | 1.707236  | -0.918678 |
| H  | 5.125185  | 2.439397  | -1.490551 |
| S  | 2.818350  | 1.622097  | -1.292929 |
| S  | 1.081075  | -1.081584 | 1.896080  |
| O  | 0.227953  | 0.384960  | -0.349364 |
| C  | -0.979294 | 0.016492  | 0.206399  |
| H  | -0.469643 | -0.496778 | 1.283890  |
| N  | -1.843445 | 1.021287  | 0.564782  |
| O  | 2.094889  | -1.747441 | -1.057188 |
| C  | -2.869882 | -1.372391 | -0.729323 |
| C  | -3.760271 | -0.313131 | -0.217397 |
| C  | -3.156233 | 0.843476  | 0.398732  |
| N  | -1.544772 | -1.107432 | -0.513976 |
| H  | -0.880350 | -1.807961 | -0.834782 |
| O  | -3.252798 | -2.394402 | -1.308136 |
| C  | -4.079431 | 1.853016  | 0.842824  |
| C  | -5.146863 | -0.425951 | -0.361606 |
| C  | -5.446852 | 1.710184  | 0.689023  |
| C  | -6.026969 | 0.565960  | 0.083121  |
| H  | -3.649693 | 2.742737  | 1.311785  |
| H  | -6.108996 | 2.509654  | 1.048188  |
| H  | -5.516898 | -1.335057 | -0.848854 |
| C  | -7.523519 | 0.428517  | -0.080241 |
| H  | -8.052765 | 1.307009  | 0.327820  |
| H  | -7.827085 | 0.331726  | -1.140975 |
| H  | -7.927883 | -0.462718 | 0.438284  |

---

**6-Methoxy-4-Quinazolinone**

31

|    |           |           |           |
|----|-----------|-----------|-----------|
| Mo | 2.319664  | -0.382061 | -0.048308 |
| S  | 4.550897  | -0.114277 | 1.012674  |
| C  | 5.415630  | 1.028504  | -0.018539 |
| H  | 6.483201  | 1.172233  | 0.200936  |
| C  | 4.808367  | 1.746172  | -0.987381 |
| H  | 5.376029  | 2.478939  | -1.578255 |
| S  | 3.088144  | 1.617545  | -1.345366 |
| S  | 1.429099  | -1.042890 | 1.918224  |
| O  | 0.531885  | 0.358822  | -0.354757 |
| C  | -0.665052 | -0.028094 | 0.216914  |
| H  | -0.139559 | -0.494743 | 1.303783  |
| N  | -1.558362 | 0.960318  | 0.539787  |
| O  | 2.423299  | -1.759096 | -1.030834 |
| C  | -2.510224 | -1.501923 | -0.683909 |
| C  | -3.433881 | -0.449757 | -0.213608 |
| C  | -2.866596 | 0.741351  | 0.369366  |
| N  | -1.196322 | -1.192644 | -0.468105 |
| H  | -0.509824 | -1.883925 | -0.761966 |
| O  | -2.864228 | -2.551380 | -1.230096 |
| C  | -3.818063 | 1.737151  | 0.772009  |
| C  | -4.814282 | -0.609975 | -0.369100 |
| C  | -5.186792 | 1.565552  | 0.615181  |
| C  | -5.703270 | 0.381787  | 0.040400  |
| H  | -3.416932 | 2.653026  | 1.214699  |
| H  | -5.857679 | 2.363159  | 0.945899  |
| H  | -5.183114 | -1.531860 | -0.825814 |
| O  | -7.060635 | 0.132280  | -0.148668 |
| C  | -7.966243 | 1.133673  | 0.183269  |
| H  | -8.973591 | 0.760213  | -0.066566 |
| H  | -7.951989 | 1.390692  | 1.264273  |
| H  | -7.795039 | 2.075055  | -0.381341 |

---

# 6-Amino-4-Quinazolinone

29

|    |           |           |           |
|----|-----------|-----------|-----------|
| Mo | 2.005094  | -0.412113 | -0.065620 |
| S  | 4.230741  | -0.199088 | 1.021954  |
| C  | 5.111707  | 0.973914  | 0.039831  |
| H  | 6.178295  | 1.102339  | 0.273417  |
| C  | 4.517970  | 1.730441  | -0.907767 |
| H  | 5.096170  | 2.480176  | -1.466405 |
| S  | 2.800207  | 1.628432  | -1.284812 |
| S  | 1.100774  | -1.138764 | 1.870921  |
| O  | 0.225221  | 0.352844  | -0.353515 |
| C  | -0.980463 | -0.011887 | 0.219858  |
| H  | -0.460269 | -0.545037 | 1.275717  |
| N  | -1.827904 | 0.996155  | 0.602631  |
| O  | 2.112922  | -1.751757 | -1.098608 |
| C  | -2.899514 | -1.351864 | -0.735648 |
| C  | -3.768580 | -0.287607 | -0.204916 |
| C  | -3.145790 | 0.841744  | 0.432290  |
| N  | -1.570130 | -1.117238 | -0.511945 |
| H  | -0.919201 | -1.822913 | -0.848110 |
| O  | -3.302729 | -2.354476 | -1.336887 |
| C  | -4.051492 | 1.859419  | 0.895327  |
| C  | -5.160235 | -0.366024 | -0.371503 |
| C  | -5.421414 | 1.750207  | 0.740874  |
| C  | -6.010892 | 0.634256  | 0.093039  |
| H  | -3.605882 | 2.728771  | 1.387161  |
| H  | -6.077693 | 2.539734  | 1.128824  |
| H  | -5.548485 | -1.249271 | -0.891655 |
| N  | -7.438269 | 0.548613  | -0.023129 |
| H  | -7.815621 | 1.387471  | -0.468638 |
| H  | -7.688403 | -0.237007 | -0.622744 |

-----  
-----

*B3LYP-D3 transition state coordinates for concerted reaction mechanism between 6-substituted 4-quinazolinones and deprotonated MoCo.*



**6-Nitro-4-Quinazolinone**

29

|    |           |           |           |
|----|-----------|-----------|-----------|
| Mo | 2.508772  | -0.308738 | -0.028494 |
| S  | 4.710903  | -0.165125 | 1.098409  |
| C  | 5.687735  | 0.848773  | 0.031382  |
| H  | 6.760464  | 0.907337  | 0.262023  |
| C  | 5.160022  | 1.572552  | -0.978621 |
| H  | 5.797704  | 2.223490  | -1.592386 |
| S  | 3.439098  | 1.576870  | -1.365675 |
| S  | 1.503439  | -0.832098 | 1.927812  |
| O  | 0.761221  | 0.507786  | -0.421167 |
| C  | -0.443047 | 0.144522  | 0.083903  |
| H  | 0.009954  | -0.274863 | 1.252644  |
| N  | -1.353104 | 1.152274  | 0.343397  |
| O  | 2.549204  | -1.725691 | -0.950898 |
| C  | -2.258024 | -1.424875 | -0.664525 |
| C  | -3.198379 | -0.371388 | -0.216047 |
| C  | -2.644197 | 0.890846  | 0.244473  |
| N  | -0.945661 | -1.047975 | -0.557747 |
| H  | -0.244902 | -1.740922 | -0.813770 |
| O  | -2.597326 | -2.518453 | -1.112842 |
| C  | -3.608058 | 1.907597  | 0.609935  |
| C  | -4.564456 | -0.583683 | -0.282684 |
| C  | -4.959131 | 1.685845  | 0.544022  |
| C  | -5.462959 | 0.429361  | 0.099122  |
| H  | -3.204312 | 2.864264  | 0.951028  |
| H  | -5.679047 | 2.454370  | 0.828070  |
| H  | -4.936435 | -1.543210 | -0.642588 |
| N  | -6.870047 | 0.210441  | 0.033369  |
| O  | -7.636002 | 1.130770  | 0.370916  |
| O  | -7.294388 | -0.887878 | -0.357334 |

**6-Trifluoromethyl-4-Quinazolinone**

30

|    |           |           |           |
|----|-----------|-----------|-----------|
| Mo | 2.880629  | -0.285075 | -0.073201 |
| S  | 5.096441  | -0.175097 | 1.043472  |
| C  | 6.027083  | 0.976560  | 0.079228  |
| H  | 7.097697  | 1.056912  | 0.314877  |
| C  | 5.467660  | 1.772378  | -0.857366 |
| H  | 6.078481  | 2.504620  | -1.404023 |
| S  | 3.747039  | 1.746547  | -1.243047 |
| S  | 1.908325  | -1.015268 | 1.829710  |
| O  | 1.119955  | 0.533422  | -0.377222 |
| C  | -0.084332 | 0.114883  | 0.110263  |
| H  | 0.386530  | -0.416464 | 1.210099  |
| N  | -0.996672 | 1.084036  | 0.471543  |
| O  | 2.949808  | -1.612706 | -1.121374 |
| C  | -1.896469 | -1.357891 | -0.833244 |
| C  | -2.837626 | -0.368246 | -0.270068 |
| C  | -2.291264 | 0.828545  | 0.333626  |
| N  | -0.585512 | -1.008271 | -0.654228 |
| H  | 0.117127  | -1.663582 | -0.990221 |
| O  | -2.232881 | -2.387184 | -1.422451 |
| C  | -3.264103 | 1.787806  | 0.804730  |
| C  | -4.210923 | -0.580350 | -0.359848 |
| C  | -4.617059 | 1.557321  | 0.711941  |
| C  | -5.123530 | 0.361094  | 0.129869  |
| H  | -2.872302 | 2.706842  | 1.248589  |
| H  | -5.323681 | 2.305879  | 1.085503  |
| H  | -4.548690 | -1.505324 | -0.833245 |
| C  | -6.583357 | 0.115243  | 0.114337  |
| F  | -7.304789 | 1.212324  | -0.261172 |
| F  | -6.952708 | -0.887635 | -0.715664 |
| F  | -7.101775 | -0.218275 | 1.339064  |

## 6-Chloro-4-Quinazolinone

27

|    |           |           |           |
|----|-----------|-----------|-----------|
| Mo | 2.341479  | -0.324405 | -0.081974 |
| S  | 4.575913  | -0.178446 | 1.000153  |
| C  | 5.463910  | 1.011632  | 0.042680  |
| H  | 6.535100  | 1.116982  | 0.266489  |
| C  | 4.872181  | 1.806448  | -0.875027 |
| H  | 5.457507  | 2.562599  | -1.417300 |
| S  | 3.148009  | 1.742544  | -1.239071 |
| S  | 1.420975  | -1.095584 | 1.829831  |
| O  | 0.565533  | 0.464124  | -0.349919 |
| C  | -0.631853 | 0.050720  | 0.179756  |
| H  | -0.128976 | -0.493893 | 1.248327  |
| N  | -1.521460 | 1.023860  | 0.569814  |
| O  | 2.426551  | -1.635263 | -1.151034 |
| C  | -2.483866 | -1.370938 | -0.777027 |
| C  | -3.399915 | -0.358738 | -0.215312 |
| C  | -2.826507 | 0.805145  | 0.419143  |
| N  | -1.166000 | -1.061498 | -0.582468 |
| H  | -0.480606 | -1.730619 | -0.925813 |
| O  | -2.846135 | -2.386602 | -1.377303 |
| C  | -3.774132 | 1.776194  | 0.906246  |
| C  | -4.783660 | -0.528418 | -0.338681 |
| C  | -5.138850 | 1.597421  | 0.783229  |
| C  | -5.649616 | 0.437139  | 0.159295  |
| H  | -3.364588 | 2.668581  | 1.387219  |
| H  | -5.836500 | 2.347848  | 1.167045  |
| H  | -5.147838 | -1.429667 | -0.837031 |
| Cl | -7.411365 | 0.231066  | 0.015007  |

---

## 4-Quinazolinone

27

|    |           |           |           |
|----|-----------|-----------|-----------|
| Mo | 1.694780  | -0.374575 | -0.021689 |
| S  | 3.941374  | -0.271647 | 1.049088  |
| C  | 4.868942  | 0.845333  | 0.041648  |
| H  | 5.945301  | 0.916546  | 0.254779  |
| C  | 4.303467  | 1.627397  | -0.903536 |
| H  | 4.916112  | 2.337754  | -1.477129 |
| S  | 2.576406  | 1.618826  | -1.258529 |
| S  | 0.745295  | -1.050279 | 1.910981  |
| O  | -0.046778 | 0.466998  | -0.326336 |
| C  | -1.266498 | 0.100368  | 0.202963  |
| H  | -0.792286 | -0.417275 | 1.287863  |
| N  | -2.133778 | 1.108433  | 0.545996  |
| O  | 1.731696  | -1.724790 | -1.043226 |
| C  | -3.138602 | -1.289180 | -0.760537 |
| C  | -4.036711 | -0.235732 | -0.251286 |
| C  | -3.443733 | 0.925565  | 0.369058  |
| N  | -1.816201 | -1.019685 | -0.534611 |
| H  | -1.143933 | -1.716786 | -0.846768 |
| O  | -3.513428 | -2.309824 | -1.347010 |
| C  | -4.370327 | 1.936482  | 0.810801  |
| C  | -5.423618 | -0.356122 | -0.402014 |
| C  | -5.736673 | 1.790677  | 0.654384  |
| C  | -6.292174 | 0.638694  | 0.045374  |
| H  | -3.939852 | 2.825115  | 1.281455  |
| H  | -6.404114 | 2.585479  | 1.011872  |
| H  | -5.790905 | -1.264622 | -0.890202 |
| H  | -7.375972 | 0.537260  | -0.072693 |

---

**6-Methyl-4-Quinazolinone**

30

|    |           |           |           |
|----|-----------|-----------|-----------|
| Mo | 1.967401  | -0.358685 | -0.034633 |
| S  | 4.223681  | -0.221135 | 1.009616  |
| C  | 5.122985  | 0.909928  | -0.007759 |
| H  | 6.200149  | 0.998518  | 0.194548  |
| C  | 4.535182  | 1.682133  | -0.947387 |
| H  | 5.130304  | 2.401966  | -1.527526 |
| S  | 2.804763  | 1.645165  | -1.284140 |
| S  | 1.050358  | -1.045746 | 1.910383  |
| O  | 0.211440  | 0.460764  | -0.316886 |
| C  | -0.996488 | 0.077365  | 0.226937  |
| H  | -0.500959 | -0.432525 | 1.307537  |
| N  | -1.874729 | 1.072504  | 0.576952  |
| O  | 2.008608  | -1.709135 | -1.055845 |
| C  | -2.856666 | -1.341880 | -0.717842 |
| C  | -3.765355 | -0.295529 | -0.210284 |
| C  | -3.183387 | 0.872345  | 0.405920  |
| N  | -1.537282 | -1.054547 | -0.500660 |
| H  | -0.857705 | -1.744065 | -0.814023 |
| O  | -3.223331 | -2.370110 | -1.296167 |
| C  | -4.125199 | 1.864261  | 0.851279  |
| C  | -5.149334 | -0.432914 | -0.357224 |
| C  | -5.489517 | 1.696971  | 0.695616  |
| C  | -6.046824 | 0.543094  | 0.086324  |
| H  | -3.712213 | 2.758250  | 1.327220  |
| H  | -6.166983 | 2.482219  | 1.057660  |
| H  | -5.503477 | -1.348659 | -0.843774 |
| C  | -7.537720 | 0.392073  | -0.108335 |
| H  | -8.101902 | 1.112968  | 0.509400  |
| H  | -7.850484 | 0.559628  | -1.159214 |
| H  | -7.890255 | -0.620041 | 0.163226  |

---

**6-Methoxy-4-Quinazolinone**

31

|    |           |           |           |
|----|-----------|-----------|-----------|
| Mo | 2.275627  | -0.342786 | -0.007768 |
| S  | 4.538799  | -0.151678 | 1.013098  |
| C  | 5.410136  | 0.981468  | -0.026132 |
| H  | 6.486907  | 1.092239  | 0.167199  |
| C  | 4.801726  | 1.729137  | -0.972440 |
| H  | 5.379856  | 2.451365  | -1.566674 |
| S  | 3.069889  | 1.656223  | -1.295500 |
| S  | 1.385835  | -1.023572 | 1.951012  |
| O  | 0.507695  | 0.450116  | -0.289816 |
| C  | -0.693306 | 0.031889  | 0.252810  |
| H  | -0.192008 | -0.442382 | 1.341071  |
| N  | -1.610009 | 1.000273  | 0.570513  |
| O  | 2.324947  | -1.704446 | -1.013909 |
| C  | -2.485358 | -1.456327 | -0.724082 |
| C  | -3.439471 | -0.433868 | -0.247061 |
| C  | -2.909618 | 0.756888  | 0.371197  |
| N  | -1.184146 | -1.132793 | -0.463094 |
| H  | -0.474798 | -1.799729 | -0.759995 |
| O  | -2.809046 | -2.495166 | -1.307898 |
| C  | -3.890327 | 1.720565  | 0.780984  |
| C  | -4.812573 | -0.623222 | -0.427271 |
| C  | -5.252439 | 1.519312  | 0.601418  |
| C  | -5.731434 | 0.336555  | -0.007526 |
| H  | -3.518141 | 2.634444  | 1.252201  |
| H  | -5.946286 | 2.292547  | 0.941853  |
| H  | -5.153077 | -1.542884 | -0.909548 |
| O  | -7.078591 | 0.057225  | -0.224917 |
| C  | -8.019008 | 0.997971  | 0.181629  |
| H  | -9.014776 | 0.598935  | -0.075501 |
| H  | -7.994709 | 1.189453  | 1.276478  |
| H  | -7.897857 | 1.979370  | -0.326325 |

---

**6-Amino-4-Quinazolinone**

29

|    |           |           |           |
|----|-----------|-----------|-----------|
| Mo | 1.981939  | -0.369339 | -0.021721 |
| S  | 4.247981  | -0.217130 | 1.002647  |
| C  | 5.134237  | 0.913888  | -0.026128 |
| H  | 6.212423  | 1.008936  | 0.168062  |
| C  | 4.536106  | 1.678551  | -0.965565 |
| H  | 5.124167  | 2.398346  | -1.553111 |
| S  | 2.803565  | 1.631724  | -1.289934 |
| S  | 1.084420  | -1.051300 | 1.933260  |
| O  | 0.224812  | 0.446964  | -0.296971 |
| C  | -0.982857 | 0.062643  | 0.261049  |
| H  | -0.479831 | -0.437715 | 1.334325  |
| N  | -1.861701 | 1.057126  | 0.604483  |
| O  | 2.019130  | -1.723866 | -1.038492 |
| C  | -2.841086 | -1.350482 | -0.702833 |
| C  | -3.749292 | -0.301529 | -0.205498 |
| C  | -3.171335 | 0.859699  | 0.416848  |
| N  | -1.524212 | -1.074860 | -0.460003 |
| H  | -0.843867 | -1.764332 | -0.771804 |
| O  | -3.207893 | -2.373376 | -1.292959 |
| C  | -4.114368 | 1.857821  | 0.845330  |
| C  | -5.134473 | -0.427173 | -0.390912 |
| C  | -5.478028 | 1.702118  | 0.674034  |
| C  | -6.022684 | 0.555195  | 0.041419  |
| H  | -3.703480 | 2.750500  | 1.325483  |
| H  | -6.164884 | 2.477939  | 1.035870  |
| H  | -5.486388 | -1.332429 | -0.898957 |
| N  | -7.444966 | 0.423680  | -0.092449 |
| H  | -7.841273 | 1.248214  | -0.547812 |
| H  | -7.664721 | -0.372849 | -0.689474 |

-----  
-----

*B3LYP transition state coordinates for an initial proton transfer (TS1) and a subsequent concerted reaction with deprotonated MoCo for 6-substituted 4-quinazolinones.*

**6-Nitro-4-Quinazolinone (TS1)**

30

|    |           |           |           |
|----|-----------|-----------|-----------|
| Mo | 2.161874  | -0.023999 | 0.245984  |
| S  | 2.928290  | 0.135158  | -2.099798 |
| C  | 4.024527  | 1.488189  | -2.211012 |
| H  | 4.500093  | 1.650955  | -3.184571 |
| C  | 4.237646  | 2.321242  | -1.170352 |
| H  | 4.894765  | 3.193738  | -1.257415 |
| S  | 3.439891  | 2.101675  | 0.364514  |
| S  | 3.349693  | -1.492762 | 1.278894  |
| O  | 1.055610  | 0.749063  | 1.496869  |
| H  | 0.172126  | 0.143667  | 1.599991  |
| C  | -0.347635 | -1.789807 | 0.469234  |
| H  | 0.387571  | -2.432983 | 0.972267  |
| N  | -0.913363 | -0.823875 | 1.253266  |
| O  | 0.794912  | -0.969798 | -0.503929 |
| C  | -2.413984 | -2.087597 | -0.857830 |
| C  | -2.935226 | -0.919832 | -0.118501 |
| C  | -2.130764 | -0.332883 | 0.907100  |
| N  | -1.163472 | -2.495284 | -0.416446 |
| H  | -0.738794 | -3.247351 | -0.951575 |
| O  | -3.003564 | -2.684677 | -1.743619 |
| C  | -2.662012 | 0.793645  | 1.602433  |
| C  | -4.201702 | -0.416620 | -0.417549 |
| C  | -3.913012 | 1.290616  | 1.300371  |
| C  | -4.686406 | 0.679614  | 0.290293  |
| H  | -2.048396 | 1.257373  | 2.377559  |
| H  | -4.325648 | 2.152289  | 1.825048  |
| H  | -4.795362 | -0.884890 | -1.202483 |
| N  | -6.011002 | 1.207052  | -0.013815 |
| O  | -6.406928 | 2.174118  | 0.631317  |
| O  | -6.665746 | 0.659824  | -0.894226 |

---

**6-Nitro-4-Quinazolinone (TS2)**

30

|    |           |           |           |
|----|-----------|-----------|-----------|
| Mo | 2.313474  | 0.359727  | -0.070262 |
| S  | 3.387831  | 0.131944  | -2.258842 |
| C  | 5.072861  | 0.556781  | -1.950358 |
| H  | 5.703721  | 0.699042  | -2.835480 |
| C  | 5.571611  | 0.682684  | -0.706469 |
| H  | 6.628833  | 0.917164  | -0.535617 |
| S  | 4.596110  | 0.390667  | 0.737671  |
| S  | 1.603132  | -0.852237 | 1.729072  |
| O  | 1.653956  | 1.907514  | 0.147967  |
| H  | -0.482298 | 1.122467  | 0.257625  |
| C  | -0.351931 | -0.839475 | -0.333569 |
| H  | 0.267791  | -1.235788 | 0.947504  |
| N  | -1.077061 | 0.325699  | 0.015901  |
| O  | 0.786187  | -0.655928 | -0.947817 |
| C  | -2.559702 | -1.974159 | -0.698168 |
| C  | -3.211070 | -0.762334 | -0.128800 |
| C  | -2.419608 | 0.370943  | 0.206641  |
| N  | -1.187327 | -1.876370 | -0.808452 |
| H  | -0.703007 | -2.691785 | -1.174638 |
| O  | -3.167310 | -2.970641 | -1.051591 |
| C  | -3.058620 | 1.529223  | 0.720623  |
| C  | -4.591885 | -0.731853 | 0.044278  |
| C  | -4.431188 | 1.549858  | 0.888879  |
| C  | -5.197253 | 0.418867  | 0.551607  |
| H  | -2.454026 | 2.400732  | 0.982286  |
| H  | -4.939899 | 2.429517  | 1.283480  |
| N  | -6.643500 | 0.455991  | 0.732263  |
| H  | -5.184098 | -1.606733 | -0.223315 |
| O  | -7.140600 | 1.487914  | 1.174351  |
| O  | -7.287824 | -0.542707 | 0.433614  |

---

6-Trifluoromethyl-4-Quinazolinone (TS1)

31

|    |           |           |           |
|----|-----------|-----------|-----------|
| Mo | 2.450616  | -0.148680 | 0.215749  |
| S  | 3.144278  | 0.142035  | -2.151536 |
| C  | 4.157191  | 1.562702  | -2.224305 |
| H  | 4.622568  | 1.780518  | -3.192396 |
| C  | 4.313382  | 2.386524  | -1.165980 |
| H  | 4.911914  | 3.302024  | -1.237387 |
| S  | 3.515793  | 2.098044  | 0.359531  |
| S  | 3.830697  | -1.535911 | 1.127561  |
| O  | 1.360601  | 0.480132  | 1.537453  |
| H  | 0.431007  | -0.167844 | 1.621547  |
| C  | -0.018838 | -2.015967 | 0.539283  |
| H  | 0.762174  | -2.623058 | 1.010893  |
| N  | -0.566171 | -1.041102 | 1.304637  |
| O  | 1.138416  | -1.163266 | -0.521690 |
| C  | -2.077555 | -2.313890 | -0.782039 |
| C  | -2.575209 | -1.111208 | -0.084323 |
| C  | -1.772980 | -0.512197 | 0.925792  |
| N  | -0.834926 | -2.733399 | -0.324792 |
| H  | -0.410511 | -3.489523 | -0.854408 |
| O  | -2.675630 | -2.924704 | -1.652737 |
| C  | -2.269043 | 0.650644  | 1.566412  |
| C  | -3.822531 | -0.575872 | -0.419561 |
| C  | -3.502577 | 1.176957  | 1.218387  |
| C  | -4.295316 | 0.565716  | 0.225269  |
| H  | -1.651094 | 1.128739  | 2.329075  |
| H  | -3.867896 | 2.077082  | 1.716429  |
| C  | -5.634475 | 1.123697  | -0.158590 |
| H  | -4.399953 | -1.077789 | -1.199315 |
| F  | -5.976749 | 2.197895  | 0.581456  |
| F  | -5.678016 | 1.510927  | -1.451637 |
| F  | -6.625080 | 0.215509  | -0.009538 |

6-Trifluoromethyl-4-Quinazolinone (TS2)

31

|    |           |           |           |
|----|-----------|-----------|-----------|
| Mo | 2.629290  | 0.373155  | 0.079125  |
| S  | 3.820791  | 1.171901  | -1.908101 |
| C  | 5.479348  | 1.400653  | -1.348659 |
| H  | 6.152376  | 1.924057  | -2.037877 |
| C  | 5.910394  | 0.949253  | -0.156046 |
| H  | 6.952535  | 1.076641  | 0.159761  |
| S  | 4.868481  | 0.041661  | 0.945150  |
| S  | 1.876740  | -1.533502 | 1.075758  |
| O  | 1.913529  | 1.644828  | 0.946730  |
| H  | -0.143954 | 0.910408  | 0.607157  |
| C  | 0.007140  | -0.560781 | -0.815950 |
| H  | 0.575725  | -1.512527 | 0.133169  |
| N  | -0.729613 | 0.317625  | 0.012991  |
| O  | 1.161953  | -0.125068 | -1.248909 |
| C  | -2.182602 | -1.434721 | -1.662662 |
| C  | -2.838513 | -0.674792 | -0.564033 |
| C  | -2.066517 | 0.199026  | 0.243779  |
| N  | -0.817807 | -1.246113 | -1.741070 |
| H  | -0.324368 | -1.783189 | -2.449008 |
| O  | -2.780844 | -2.159790 | -2.441993 |
| C  | -2.713915 | 0.942351  | 1.258905  |
| C  | -4.212985 | -0.796679 | -0.352452 |
| C  | -4.078874 | 0.805947  | 1.455980  |
| C  | -4.843953 | -0.065641 | 0.656093  |
| H  | -2.126278 | 1.619418  | 1.883255  |
| H  | -4.569326 | 1.384741  | 2.241792  |
| C  | -6.306936 | -0.243203 | 0.932888  |
| H  | -4.769306 | -1.472697 | -1.004399 |
| F  | -6.872458 | 0.888015  | 1.407969  |
| F  | -6.997871 | -0.603385 | -0.165634 |
| F  | -6.543425 | -1.198424 | 1.862113  |

**6-Chloro-4-Quinazolinone (TS1)**

28

|    |           |           |           |
|----|-----------|-----------|-----------|
| Mo | 1.939895  | -0.130730 | 0.158022  |
| S  | 2.837057  | -0.022911 | -2.177071 |
| C  | 4.003379  | 1.274700  | -2.230764 |
| H  | 4.547333  | 1.404588  | -3.174036 |
| C  | 4.192283  | 2.117095  | -1.191445 |
| H  | 4.896231  | 2.955219  | -1.259006 |
| S  | 3.284501  | 1.982060  | 0.293096  |
| S  | 3.060677  | -1.650225 | 1.235874  |
| O  | 0.877368  | 0.673497  | 1.375132  |
| H  | -0.203096 | 0.004452  | 1.496639  |
| C  | -0.679576 | -1.817398 | 0.601634  |
| H  | 0.158019  | -2.363577 | 1.043855  |
| N  | -1.131700 | -0.729751 | 1.240575  |
| O  | 0.617801  | -1.034219 | -0.655875 |
| C  | -2.779812 | -2.121754 | -0.635067 |
| C  | -3.192235 | -0.828129 | -0.054981 |
| C  | -2.325476 | -0.161393 | 0.843301  |
| N  | -1.528942 | -2.547196 | -0.187003 |
| H  | -1.158967 | -3.377395 | -0.641508 |
| O  | -3.435256 | -2.793769 | -1.411396 |
| C  | -2.714039 | 1.098444  | 1.351294  |
| C  | -4.427304 | -0.264663 | -0.413640 |
| C  | -3.931659 | 1.655253  | 0.988222  |
| C  | -4.790986 | 0.966841  | 0.111180  |
| H  | -2.032662 | 1.628740  | 2.019763  |
| H  | -4.230494 | 2.631285  | 1.375656  |
| H  | -5.068938 | -0.808598 | -1.108248 |
| Cl | -6.331645 | 1.688897  | -0.323810 |

-----  
**6-Chloro-4-Quinazolinone (TS2)**

28

|    |           |           |           |
|----|-----------|-----------|-----------|
| Mo | 2.177593  | 0.024684  | 0.316339  |
| S  | 3.419598  | 1.347947  | -1.336305 |
| C  | 5.106863  | 1.153328  | -0.856944 |
| H  | 5.829049  | 1.809749  | -1.356743 |
| C  | 5.501190  | 0.241827  | 0.051967  |
| H  | 6.558978  | 0.117129  | 0.312472  |
| S  | 4.372461  | -0.876788 | 0.824674  |
| S  | 1.191967  | -2.010287 | 0.634731  |
| O  | 1.693231  | 0.976275  | 1.631505  |
| H  | -0.679735 | 0.645091  | 1.073586  |
| C  | -0.557683 | -0.260243 | -0.760375 |
| H  | -0.094354 | -1.524417 | -0.176974 |
| N  | -1.268960 | 0.356830  | 0.292321  |
| O  | 0.642864  | 0.194695  | -1.007110 |
| C  | -2.759482 | -0.586856 | -1.919476 |
| C  | -3.419327 | -0.138122 | -0.663518 |
| C  | -2.631331 | 0.330681  | 0.415931  |
| N  | -1.382202 | -0.539832 | -1.878113 |
| H  | -0.891900 | -0.869995 | -2.705029 |
| O  | -3.365505 | -0.957757 | -2.912944 |
| C  | -3.284541 | 0.778145  | 1.586321  |
| C  | -4.815349 | -0.157321 | -0.571160 |
| C  | -4.672166 | 0.756134  | 1.669252  |
| C  | -5.438405 | 0.286778  | 0.590752  |
| H  | -2.690138 | 1.141109  | 2.428509  |
| H  | -5.172929 | 1.101055  | 2.576357  |
| Cl | -7.191244 | 0.266248  | 0.717483  |
| H  | -5.383975 | -0.522225 | -1.427959 |

-----



**4-Quinazolinone (TS1)**

28

|    |           |           |           |
|----|-----------|-----------|-----------|
| Mo | 1.402359  | -0.091929 | 0.165501  |
| S  | 2.456544  | -0.617980 | -2.052411 |
| C  | 3.808295  | 0.466811  | -2.259735 |
| H  | 4.427846  | 0.312944  | -3.151547 |
| C  | 4.056112  | 1.482981  | -1.403727 |
| H  | 4.884570  | 2.180594  | -1.576560 |
| S  | 3.043111  | 1.804760  | -0.019486 |
| S  | 2.216596  | -1.493959 | 1.623838  |
| O  | 0.432921  | 1.089671  | 1.107686  |
| H  | -0.799581 | 0.585236  | 1.310601  |
| C  | -1.460806 | -1.294630 | 0.805591  |
| H  | -0.682022 | -1.814555 | 1.369641  |
| N  | -1.766692 | -0.039733 | 1.146093  |
| O  | 0.016495  | -0.958856 | -0.564805 |
| C  | -3.558261 | -1.597365 | -0.431578 |
| C  | -3.802669 | -0.165154 | -0.179109 |
| C  | -2.867397 | 0.578017  | 0.579267  |
| N  | -2.376007 | -2.065060 | 0.152656  |
| H  | -2.115434 | -3.018767 | -0.082495 |
| O  | -4.281926 | -2.345266 | -1.064176 |
| C  | -3.077327 | 1.960229  | 0.768771  |
| C  | -4.940379 | 0.465122  | -0.710739 |
| C  | -4.203646 | 2.567020  | 0.228300  |
| C  | -5.146847 | 1.823876  | -0.507802 |
| H  | -2.332868 | 2.531961  | 1.326635  |
| H  | -4.354159 | 3.640557  | 0.374173  |
| H  | -5.636986 | -0.144845 | -1.290279 |
| H  | -6.028149 | 2.317131  | -0.925666 |

**4-Quinazolinone (TS2)**

28

|    |           |           |           |
|----|-----------|-----------|-----------|
| Mo | 1.600568  | -0.007529 | 0.171977  |
| S  | 2.789345  | 1.309441  | -1.525778 |
| C  | 4.493938  | 1.067806  | -1.136931 |
| H  | 5.205493  | 1.713844  | -1.664968 |
| C  | 4.912525  | 0.135111  | -0.260843 |
| H  | 5.979218  | -0.017528 | -0.057254 |
| S  | 3.798289  | -0.966661 | 0.555658  |
| S  | 0.584624  | -2.020609 | 0.507599  |
| O  | 1.201619  | 0.932396  | 1.524341  |
| H  | -1.153196 | 0.673881  | 1.120553  |
| C  | -1.194844 | -0.194482 | -0.734169 |
| H  | -0.740743 | -1.473231 | -0.220769 |
| N  | -1.807087 | 0.422481  | 0.378579  |
| O  | 0.001542  | 0.232337  | -1.057608 |
| C  | -3.484270 | -0.421231 | -1.734637 |
| C  | -4.036524 | 0.008811  | -0.423719 |
| C  | -3.157283 | 0.427523  | 0.605680  |
| N  | -2.105573 | -0.416948 | -1.795700 |
| H  | -1.688377 | -0.740407 | -2.664074 |
| O  | -4.168888 | -0.746696 | -2.693356 |
| C  | -3.702761 | 0.861024  | 1.834819  |
| C  | -5.420962 | 0.027904  | -0.216174 |
| C  | -5.081789 | 0.871693  | 2.017986  |
| C  | -5.954277 | 0.454796  | 0.998258  |
| H  | -3.029912 | 1.183084  | 2.633806  |
| H  | -5.487218 | 1.208485  | 2.976854  |
| H  | -7.035401 | 0.466822  | 1.156937  |
| H  | -6.056298 | -0.300590 | -1.042141 |

**6-Methyl-4-Quinazolinone (TS1)**

31

|    |           |           |           |
|----|-----------|-----------|-----------|
| Mo | 1.689662  | -0.163487 | 0.182695  |
| S  | 2.565334  | 0.032572  | -2.163612 |
| C  | 3.738451  | 1.325453  | -2.175434 |
| H  | 4.278191  | 1.488483  | -3.116277 |
| C  | 3.936372  | 2.130219  | -1.108015 |
| H  | 4.643264  | 2.967739  | -1.152003 |
| S  | 3.034736  | 1.950571  | 0.376546  |
| S  | 2.828704  | -1.728972 | 1.174249  |
| O  | 0.664288  | 0.597549  | 1.450323  |
| H  | -0.506493 | 0.011285  | 1.514359  |
| C  | -1.080194 | -1.717108 | 0.542535  |
| H  | -0.298908 | -2.342087 | 0.980080  |
| N  | -1.455927 | -0.616843 | 1.201466  |
| O  | 0.350771  | -1.011302 | -0.657465 |
| C  | -3.150076 | -1.787495 | -0.776975 |
| C  | -3.475844 | -0.489086 | -0.156856 |
| C  | -2.587901 | 0.068250  | 0.793041  |
| N  | -1.957885 | -2.339659 | -0.301226 |
| H  | -1.637797 | -3.173324 | -0.786189 |
| O  | -3.824812 | -2.372013 | -1.606398 |
| C  | -2.890511 | 1.330688  | 1.339662  |
| C  | -4.643414 | 0.196107  | -0.523884 |
| C  | -4.049894 | 1.993009  | 0.955891  |
| C  | -4.955029 | 1.441413  | 0.022808  |
| H  | -2.192942 | 1.777245  | 2.051368  |
| H  | -4.265093 | 2.975485  | 1.387895  |
| C  | -6.208411 | 2.179590  | -0.386464 |
| H  | -5.294226 | -0.279405 | -1.262880 |
| H  | -6.337174 | 3.107510  | 0.191952  |
| H  | -6.183168 | 2.455207  | -1.455097 |
| H  | -7.110112 | 1.561873  | -0.235982 |

---

**6-Methyl-4-Quinazolinone (TS2)**

31

|    |           |           |           |
|----|-----------|-----------|-----------|
| Mo | 1.845042  | 0.344185  | 0.034033  |
| S  | 3.067614  | 0.374730  | -2.101877 |
| C  | 4.762411  | 0.476348  | -1.625241 |
| H  | 5.479032  | 0.668658  | -2.435003 |
| C  | 5.172010  | 0.310530  | -0.352491 |
| H  | 6.236825  | 0.347766  | -0.085790 |
| S  | 4.057860  | -0.069561 | 0.963252  |
| S  | 0.874075  | -1.088396 | 1.534829  |
| O  | 1.361424  | 1.918604  | 0.511567  |
| H  | -0.975380 | 1.321343  | 0.328239  |
| C  | -0.917943 | -0.506072 | -0.599818 |
| H  | -0.454031 | -1.172619 | 0.588905  |
| N  | -1.591555 | 0.632991  | -0.107122 |
| O  | 0.269800  | -0.315165 | -1.113888 |
| C  | -3.165760 | -1.425395 | -1.240790 |
| C  | -3.775908 | -0.316454 | -0.461467 |
| C  | -2.948138 | 0.692338  | 0.088635  |
| N  | -1.786512 | -1.381769 | -1.299656 |
| H  | -1.328118 | -2.145614 | -1.790065 |
| O  | -3.804668 | -2.306332 | -1.797125 |
| C  | -3.555923 | 1.745160  | 0.802633  |
| C  | -5.163448 | -0.256465 | -0.295875 |
| C  | -4.940267 | 1.779072  | 0.952417  |
| C  | -5.777553 | 0.783775  | 0.411058  |
| H  | -2.930269 | 2.530660  | 1.237442  |
| H  | -5.388025 | 2.607471  | 1.513820  |
| C  | -7.279483 | 0.830686  | 0.584950  |
| H  | -5.752940 | -1.060579 | -0.747795 |
| H  | -7.592781 | 1.733712  | 1.138342  |
| H  | -7.804322 | 0.838026  | -0.389438 |
| H  | -7.654905 | -0.048150 | 1.144065  |

---

**6-Methoxy-4-Quinazolinone (TS1)**

32

|    |           |           |           |
|----|-----------|-----------|-----------|
| Mo | 1.929954  | -0.071922 | 0.148673  |
| S  | 2.853430  | 0.118043  | -2.180134 |
| C  | 3.958668  | 1.469537  | -2.196262 |
| H  | 4.511150  | 1.639175  | -3.128580 |
| C  | 4.092012  | 2.306171  | -1.143178 |
| H  | 4.757475  | 3.176909  | -1.191951 |
| S  | 3.167898  | 2.113317  | 0.325459  |
| S  | 3.114649  | -1.565188 | 1.206557  |
| O  | 0.849688  | 0.668404  | 1.378611  |
| H  | -0.274638 | -0.049681 | 1.483039  |
| C  | -0.673290 | -1.855815 | 0.592685  |
| H  | 0.198537  | -2.358721 | 1.017353  |
| N  | -1.147285 | -0.771585 | 1.206333  |
| O  | 0.659765  | -1.010375 | -0.692378 |
| C  | -2.754700 | -2.211257 | -0.660486 |
| C  | -3.194916 | -0.913224 | -0.108967 |
| C  | -2.347242 | -0.217808 | 0.785499  |
| N  | -1.495452 | -2.604829 | -0.199466 |
| H  | -1.105494 | -3.432378 | -0.641800 |
| O  | -3.389176 | -2.911300 | -1.428672 |
| C  | -2.752633 | 1.043888  | 1.254630  |
| C  | -4.424686 | -0.368838 | -0.495826 |
| C  | -3.971861 | 1.586668  | 0.859432  |
| C  | -4.823652 | 0.879274  | -0.015357 |
| H  | -2.085021 | 1.598476  | 1.917354  |
| H  | -4.252163 | 2.571985  | 1.233467  |
| O  | -6.035915 | 1.339201  | -0.442082 |
| H  | -5.060329 | -0.922780 | -1.188324 |
| C  | -6.461717 | 2.618688  | -0.045533 |
| H  | -7.437739 | 2.787761  | -0.522796 |
| H  | -6.587022 | 2.696781  | 1.051428  |
| H  | -5.763809 | 3.411276  | -0.375322 |

**6-Methoxy-4-Quinazolinone (TS2)**

32

|    |           |           |           |
|----|-----------|-----------|-----------|
| Mo | 2.181252  | 0.348554  | -0.031115 |
| S  | 3.512281  | -1.206187 | -1.389528 |
| C  | 5.181447  | -0.720641 | -1.084828 |
| H  | 5.941890  | -1.174210 | -1.731634 |
| C  | 5.518650  | 0.138864  | -0.104874 |
| H  | 6.565910  | 0.402137  | 0.086557  |
| S  | 4.327381  | 0.835102  | 0.998246  |
| S  | 1.113135  | 0.542947  | 1.976170  |
| O  | 1.724710  | 1.705780  | -0.934313 |
| H  | -0.715596 | 1.077465  | -0.688213 |
| C  | -0.541354 | -0.799468 | 0.101170  |
| H  | -0.141353 | -0.279238 | 1.395413  |
| N  | -1.278089 | 0.252552  | -0.482957 |
| O  | 0.678132  | -0.985831 | -0.337647 |
| C  | -2.705287 | -2.036123 | 0.375445  |
| C  | -3.401088 | -0.761390 | 0.045063  |
| C  | -2.646078 | 0.361547  | -0.375857 |
| N  | -1.331401 | -1.961945 | 0.295949  |
| H  | -0.814861 | -2.794181 | 0.567068  |
| O  | -3.281406 | -3.068159 | 0.685127  |
| C  | -3.334608 | 1.544773  | -0.696892 |
| C  | -4.791459 | -0.690364 | 0.134051  |
| C  | -4.726686 | 1.608983  | -0.604535 |
| C  | -5.469257 | 0.490280  | -0.186551 |
| H  | -2.770855 | 2.423847  | -1.019805 |
| H  | -5.222882 | 2.546765  | -0.858725 |
| O  | -6.832767 | 0.465311  | -0.067533 |
| H  | -5.343471 | -1.574562 | 0.457494  |
| C  | -7.561905 | 1.627442  | -0.360426 |
| H  | -8.621883 | 1.388453  | -0.190195 |
| H  | -7.281632 | 2.474848  | 0.294806  |
| H  | -7.437489 | 1.946994  | -1.413499 |

**6-Amino-4-Quinazolinone (TS1)**

30

|    |           |           |           |
|----|-----------|-----------|-----------|
| Mo | 1.679825  | -0.121686 | 0.140055  |
| S  | 2.713996  | -0.203631 | -2.154266 |
| C  | 3.993719  | 0.983375  | -2.192351 |
| H  | 4.598473  | 1.022975  | -3.106825 |
| C  | 4.204108  | 1.854124  | -1.179932 |
| H  | 4.986452  | 2.620366  | -1.245834 |
| S  | 3.210236  | 1.876570  | 0.254734  |
| S  | 2.607158  | -1.691422 | 1.345099  |
| O  | 0.670481  | 0.830832  | 1.267132  |
| H  | -0.562529 | 0.176142  | 1.433608  |
| C  | -1.095371 | -1.612788 | 0.620057  |
| H  | -0.261040 | -2.166596 | 1.057551  |
| N  | -1.463229 | -0.458905 | 1.176466  |
| O  | 0.340922  | -0.949247 | -0.708541 |
| C  | -3.205397 | -1.818863 | -0.617753 |
| C  | -3.524504 | -0.467385 | -0.118451 |
| C  | -2.615350 | 0.182373  | 0.742979  |
| N  | -1.987152 | -2.311106 | -0.137994 |
| H  | -1.678772 | -3.190051 | -0.544145 |
| O  | -3.901747 | -2.486842 | -1.361709 |
| C  | -2.905836 | 1.494887  | 1.164047  |
| C  | -4.704274 | 0.171099  | -0.529450 |
| C  | -4.071776 | 2.118784  | 0.747827  |
| C  | -4.998562 | 1.470131  | -0.105952 |
| H  | -2.188695 | 2.015184  | 1.802528  |
| H  | -4.280348 | 3.140428  | 1.080832  |
| N  | -6.189338 | 2.106333  | -0.468721 |
| H  | -5.371661 | -0.375329 | -1.200672 |
| H  | -6.143137 | 3.120339  | -0.481659 |
| H  | -6.620788 | 1.745506  | -1.313580 |

-----  
**6-Amino-4-Quinazolinone (TS2)**

30

|    |           |           |           |
|----|-----------|-----------|-----------|
| Mo | 1.866534  | 0.344856  | -0.082866 |
| S  | 3.061178  | -0.175253 | -2.165672 |
| C  | 4.763999  | 0.028088  | -1.748743 |
| H  | 5.471658  | 0.010708  | -2.586300 |
| C  | 5.186381  | 0.174652  | -0.478662 |
| H  | 6.252747  | 0.267711  | -0.239731 |
| S  | 4.080370  | 0.138295  | 0.898536  |
| S  | 0.906708  | -0.636464 | 1.736519  |
| O  | 1.419194  | 1.978025  | -0.021945 |
| H  | -0.962531 | 1.378432  | 0.002435  |
| C  | -0.894948 | -0.614629 | -0.447805 |
| H  | -0.416649 | -0.957863 | 0.864418  |
| N  | -1.574081 | 0.605986  | -0.260446 |
| O  | 0.293312  | -0.554866 | -1.002201 |
| C  | -3.133083 | -1.688682 | -0.810178 |
| C  | -3.747733 | -0.435460 | -0.297001 |
| C  | -2.929748 | 0.686212  | -0.033526 |
| N  | -1.758939 | -1.642457 | -0.907752 |
| H  | -1.294947 | -2.496301 | -1.205062 |
| O  | -3.770508 | -2.682658 | -1.129076 |
| C  | -3.547528 | 1.865192  | 0.429663  |
| C  | -5.132758 | -0.370542 | -0.107950 |
| C  | -4.925060 | 1.914219  | 0.617383  |
| C  | -5.749433 | 0.798947  | 0.351677  |
| H  | -2.934064 | 2.744243  | 0.643914  |
| H  | -5.379101 | 2.838765  | 0.988375  |
| N  | -7.131015 | 0.851616  | 0.599909  |
| H  | -5.711510 | -1.269806 | -0.335333 |
| H  | -7.539777 | 1.774817  | 0.488986  |
| H  | -7.667808 | 0.158895  | 0.086832  |

-----  
-----

*B3LYP-D3 transition state coordinates for an initial proton transfer (TS1) and a subsequent concerted reaction with deprotonated MoCo for 6-substituted 4-quinazolinones.*

**6-Nitro-4-Quinazolinone (TS1)**

30

|    |           |           |           |
|----|-----------|-----------|-----------|
| Mo | 2.120486  | -0.002835 | 0.246495  |
| S  | 2.871916  | 0.146484  | -2.104527 |
| C  | 3.978272  | 1.492257  | -2.224961 |
| H  | 4.443307  | 1.655599  | -3.203712 |
| C  | 4.216452  | 2.318071  | -1.183109 |
| H  | 4.883578  | 3.182428  | -1.276988 |
| S  | 3.446160  | 2.094847  | 0.366407  |
| S  | 3.271409  | -1.489160 | 1.291526  |
| O  | 1.013596  | 0.785555  | 1.489278  |
| H  | 0.164986  | 0.147359  | 1.625607  |
| C  | -0.337897 | -1.802703 | 0.478523  |
| H  | 0.409018  | -2.442776 | 0.970345  |
| N  | -0.913526 | -0.859034 | 1.287094  |
| O  | 0.751760  | -0.952746 | -0.499884 |
| C  | -2.396727 | -2.092610 | -0.856761 |
| C  | -2.917126 | -0.927591 | -0.112459 |
| C  | -2.122485 | -0.358289 | 0.930823  |
| N  | -1.154710 | -2.513870 | -0.405140 |
| H  | -0.720549 | -3.249198 | -0.955269 |
| O  | -2.981702 | -2.674924 | -1.755613 |
| C  | -2.652116 | 0.767827  | 1.627898  |
| C  | -4.173149 | -0.409549 | -0.426151 |
| C  | -3.892963 | 1.280320  | 1.311221  |
| C  | -4.657815 | 0.685500  | 0.284193  |
| H  | -2.042345 | 1.220206  | 2.412751  |
| H  | -4.303457 | 2.142960  | 1.835942  |
| H  | -4.758128 | -0.865633 | -1.224671 |
| N  | -5.972627 | 1.228388  | -0.036118 |
| O  | -6.371172 | 2.192976  | 0.611858  |
| O  | -6.618468 | 0.696003  | -0.932574 |

---

**6-Nitro-4-Quinazolinone (TS2)**

30

|    |           |           |           |
|----|-----------|-----------|-----------|
| Mo | 2.307592  | 0.354675  | -0.066725 |
| S  | 3.388641  | 0.108936  | -2.250702 |
| C  | 5.071791  | 0.544955  | -1.939417 |
| H  | 5.706852  | 0.681637  | -2.822745 |
| C  | 5.566258  | 0.686757  | -0.694696 |
| H  | 6.622277  | 0.929016  | -0.525755 |
| S  | 4.588842  | 0.406383  | 0.752552  |
| S  | 1.572379  | -0.837370 | 1.735729  |
| O  | 1.646093  | 1.903657  | 0.129612  |
| H  | -0.479927 | 1.128588  | 0.230062  |
| C  | -0.353837 | -0.837630 | -0.348328 |
| H  | 0.241739  | -1.228808 | 0.939768  |
| N  | -1.076111 | 0.334121  | -0.013595 |
| O  | 0.789791  | -0.664412 | -0.955540 |
| C  | -2.558967 | -1.975189 | -0.699603 |
| C  | -3.206693 | -0.761246 | -0.130114 |
| C  | -2.415860 | 0.376606  | 0.190574  |
| N  | -1.188655 | -1.873502 | -0.825764 |
| H  | -0.701710 | -2.690340 | -1.184274 |
| O  | -3.168988 | -2.974492 | -1.040712 |
| C  | -3.052956 | 1.536117  | 0.703216  |
| C  | -4.585388 | -0.734496 | 0.055686  |
| C  | -4.423964 | 1.553510  | 0.884111  |
| C  | -5.189713 | 0.417639  | 0.561206  |
| H  | -2.447693 | 2.410533  | 0.953262  |
| H  | -4.931144 | 2.434443  | 1.277768  |
| N  | -6.635394 | 0.450276  | 0.754355  |
| H  | -5.176172 | -1.613554 | -0.201233 |
| O  | -7.133196 | 1.482137  | 1.196147  |
| O  | -7.278586 | -0.552226 | 0.465534  |

---

**6-Trifluoromethyl-4-Quinazolinone (TS1)**

31

|    |           |           |           |
|----|-----------|-----------|-----------|
| Mo | 2.380161  | -0.138772 | 0.166978  |
| S  | 3.130128  | 0.235896  | -2.190647 |
| C  | 4.135263  | 1.665259  | -2.193491 |
| H  | 4.618362  | 1.922376  | -3.143857 |
| C  | 4.272378  | 2.452856  | -1.103602 |
| H  | 4.871147  | 3.371083  | -1.138959 |
| S  | 3.451741  | 2.114640  | 0.400947  |
| S  | 3.740946  | -1.576331 | 1.053915  |
| O  | 1.311145  | 0.448119  | 1.501984  |
| H  | 0.324371  | -0.320631 | 1.612209  |
| C  | -0.056936 | -2.102283 | 0.578809  |
| H  | 0.813638  | -2.633686 | 0.973707  |
| N  | -0.568917 | -1.105519 | 1.317415  |
| O  | 1.114704  | -1.129729 | -0.642214 |
| C  | -2.126539 | -2.401832 | -0.701366 |
| C  | -2.594086 | -1.170311 | -0.033201 |
| C  | -1.768163 | -0.545535 | 0.934558  |
| N  | -0.868755 | -2.817436 | -0.263316 |
| H  | -0.449100 | -3.575620 | -0.793801 |
| O  | -2.744615 | -3.030464 | -1.541238 |
| C  | -2.195095 | 0.669329  | 1.513831  |
| C  | -3.826879 | -0.608888 | -0.382077 |
| C  | -3.415653 | 1.220061  | 1.153445  |
| C  | -4.244665 | 0.580134  | 0.210976  |
| H  | -1.536181 | 1.168902  | 2.226494  |
| H  | -3.739035 | 2.163362  | 1.596907  |
| C  | -5.574034 | 1.161692  | -0.180481 |
| H  | -4.430871 | -1.121300 | -1.134137 |
| F  | -5.826634 | 2.331363  | 0.440538  |
| F  | -5.655097 | 1.391359  | -1.507350 |
| F  | -6.596450 | 0.329544  | 0.119601  |

-----  
**6-Trifluoromethyl-4-Quinazolinone (TS2)**

31

|    |           |           |           |
|----|-----------|-----------|-----------|
| Mo | 2.628210  | 0.391128  | 0.090349  |
| S  | 3.821300  | 1.157277  | -1.909102 |
| C  | 5.487642  | 1.364243  | -1.360568 |
| H  | 6.166696  | 1.869471  | -2.057784 |
| C  | 5.918458  | 0.918093  | -0.165056 |
| H  | 6.964996  | 1.033487  | 0.141580  |
| S  | 4.869117  | 0.038590  | 0.954352  |
| S  | 1.841165  | -1.496642 | 1.099141  |
| O  | 1.934056  | 1.679749  | 0.947859  |
| H  | -0.160605 | 0.943614  | 0.608699  |
| C  | 0.003416  | -0.522585 | -0.816741 |
| H  | 0.548449  | -1.473264 | 0.143078  |
| N  | -0.741116 | 0.364202  | -0.001448 |
| O  | 1.163265  | -0.093569 | -1.240826 |
| C  | -2.171833 | -1.420313 | -1.663914 |
| C  | -2.834124 | -0.666635 | -0.564478 |
| C  | -2.073044 | 0.217762  | 0.242116  |
| N  | -0.812015 | -1.205580 | -1.752004 |
| H  | -0.308387 | -1.745829 | -2.449869 |
| O  | -2.763192 | -2.158616 | -2.436033 |
| C  | -2.726622 | 0.946292  | 1.264004  |
| C  | -4.206485 | -0.805832 | -0.352354 |
| C  | -4.089805 | 0.792444  | 1.462158  |
| C  | -4.843952 | -0.083063 | 0.656705  |
| H  | -2.144979 | 1.627426  | 1.889622  |
| H  | -4.589199 | 1.361027  | 2.249980  |
| C  | -6.306117 | -0.271690 | 0.927977  |
| H  | -4.757365 | -1.486816 | -1.003495 |
| F  | -6.892657 | 0.870770  | 1.350665  |
| F  | -6.980386 | -0.688880 | -0.161138 |
| F  | -6.535038 | -1.189842 | 1.896039  |

-----

**6-Chloro-4-Quinazolinone (TS1)**

28

|    |           |           |           |
|----|-----------|-----------|-----------|
| Mo | 1.896359  | -0.120210 | 0.144797  |
| S  | 2.797300  | 0.014563  | -2.195182 |
| C  | 3.960663  | 1.317170  | -2.231335 |
| H  | 4.505615  | 1.462158  | -3.172267 |
| C  | 4.150148  | 2.147285  | -1.181053 |
| H  | 4.854522  | 2.986008  | -1.242187 |
| S  | 3.246012  | 1.995193  | 0.305797  |
| S  | 3.015997  | -1.660295 | 1.199882  |
| O  | 0.849057  | 0.667275  | 1.381420  |
| H  | -0.232526 | -0.058134 | 1.533917  |
| C  | -0.696084 | -1.868133 | 0.642123  |
| H  | 0.171571  | -2.394479 | 1.050064  |
| N  | -1.138860 | -0.782254 | 1.282775  |
| O  | 0.583768  | -1.016394 | -0.679084 |
| C  | -2.786249 | -2.147815 | -0.607641 |
| C  | -3.181999 | -0.845051 | -0.036863 |
| C  | -2.314552 | -0.188225 | 0.865724  |
| N  | -1.542261 | -2.590131 | -0.149116 |
| H  | -1.169780 | -3.412765 | -0.615089 |
| O  | -3.443199 | -2.810536 | -1.389347 |
| C  | -2.667691 | 1.090674  | 1.346437  |
| C  | -4.395202 | -0.254056 | -0.422753 |
| C  | -3.863834 | 1.675185  | 0.956430  |
| C  | -4.731067 | 0.994936  | 0.079792  |
| H  | -1.973558 | 1.613326  | 2.007699  |
| H  | -4.139691 | 2.667241  | 1.319065  |
| H  | -5.040727 | -0.787907 | -1.121430 |
| Cl | -6.244395 | 1.751837  | -0.388695 |

**6-Chloro-4-Quinazolinone (TS2)**

28

|    |           |           |           |
|----|-----------|-----------|-----------|
| Mo | 2.172111  | 0.032090  | 0.313888  |
| S  | 3.428080  | 1.321209  | -1.354871 |
| C  | 5.112866  | 1.125211  | -0.860931 |
| H  | 5.842835  | 1.769479  | -1.365756 |
| C  | 5.498187  | 0.226040  | 0.065155  |
| H  | 6.554958  | 0.103126  | 0.331668  |
| S  | 4.361225  | -0.876852 | 0.851819  |
| S  | 1.161319  | -1.986980 | 0.646140  |
| O  | 1.687189  | 1.002214  | 1.614418  |
| H  | -0.678436 | 0.677381  | 1.061402  |
| C  | -0.558560 | -0.234388 | -0.767788 |
| H  | -0.118103 | -1.494955 | -0.180246 |
| N  | -1.268848 | 0.393358  | 0.279687  |
| O  | 0.643693  | 0.216984  | -1.013437 |
| C  | -2.755788 | -0.581547 | -1.922240 |
| C  | -3.414673 | -0.138645 | -0.663188 |
| C  | -2.629114 | 0.345581  | 0.411295  |
| N  | -1.379446 | -0.517633 | -1.886855 |
| H  | -0.884832 | -0.849351 | -2.710137 |
| O  | -3.363037 | -0.961938 | -2.911365 |
| C  | -3.282453 | 0.786158  | 1.583767  |
| C  | -4.809285 | -0.178429 | -0.564535 |
| C  | -4.669121 | 0.743566  | 1.673436  |
| C  | -5.433272 | 0.259759  | 0.599351  |
| H  | -2.688156 | 1.159913  | 2.421271  |
| H  | -5.172144 | 1.082957  | 2.581308  |
| Cl | -7.185319 | 0.213469  | 0.733382  |
| H  | -5.377307 | -0.553913 | -1.417091 |



**4-Quinazolinone (TS1)**

28

|    |           |           |           |
|----|-----------|-----------|-----------|
| Mo | 1.354103  | -0.077578 | 0.163173  |
| S  | 2.380752  | -0.574484 | -2.076266 |
| C  | 3.733146  | 0.512465  | -2.282162 |
| H  | 4.343542  | 0.371407  | -3.182696 |
| C  | 3.993886  | 1.516276  | -1.414281 |
| H  | 4.823370  | 2.212628  | -1.589068 |
| S  | 2.998557  | 1.823346  | -0.012281 |
| S  | 2.187843  | -1.488934 | 1.600970  |
| O  | 0.392182  | 1.092385  | 1.127540  |
| H  | -0.820144 | 0.546024  | 1.372789  |
| C  | -1.475574 | -1.331434 | 0.862715  |
| H  | -0.685416 | -1.851169 | 1.412129  |
| N  | -1.782003 | -0.081317 | 1.216181  |
| O  | -0.032341 | -0.950278 | -0.554002 |
| C  | -3.549034 | -1.614482 | -0.411788 |
| C  | -3.778110 | -0.178163 | -0.169324 |
| C  | -2.854395 | 0.552728  | 0.613168  |
| N  | -2.387316 | -2.097892 | 0.202853  |
| H  | -2.119416 | -3.045574 | -0.047324 |
| O  | -4.266141 | -2.352258 | -1.062873 |
| C  | -3.034595 | 1.941076  | 0.779470  |
| C  | -4.882749 | 0.470498  | -0.745884 |
| C  | -4.127756 | 2.566902  | 0.193994  |
| C  | -5.063935 | 1.835984  | -0.563825 |
| H  | -2.289101 | 2.500814  | 1.347938  |
| H  | -4.255773 | 3.645959  | 0.318467  |
| H  | -5.571294 | -0.130692 | -1.343940 |
| H  | -5.918604 | 2.344577  | -1.017036 |

**4-Quinazolinone (TS2)**

28

|    |           |           |           |
|----|-----------|-----------|-----------|
| Mo | 1.526270  | 0.099437  | 0.235047  |
| S  | 2.759322  | 1.238517  | -1.555535 |
| C  | 4.455005  | 1.056296  | -1.095742 |
| H  | 5.179624  | 1.639378  | -1.677119 |
| C  | 4.853852  | 0.236425  | -0.104159 |
| H  | 5.916187  | 0.117677  | 0.141781  |
| S  | 3.724047  | -0.771646 | 0.809834  |
| S  | 0.506838  | -1.874296 | 0.748132  |
| O  | 1.056837  | 1.180424  | 1.453153  |
| H  | -1.225194 | 0.834432  | 1.004275  |
| C  | -1.217395 | -0.210457 | -0.756375 |
| H  | -0.791341 | -1.426897 | -0.101950 |
| N  | -1.859850 | 0.511515  | 0.273177  |
| O  | -0.013124 | 0.184760  | -1.088440 |
| C  | -3.475581 | -0.588173 | -1.770226 |
| C  | -4.059206 | -0.067829 | -0.505864 |
| C  | -3.210658 | 0.477191  | 0.489421  |
| N  | -2.097237 | -0.537821 | -1.816608 |
| H  | -1.652310 | -0.931762 | -2.640636 |
| O  | -4.136564 | -1.019914 | -2.703232 |
| C  | -3.786092 | 0.991154  | 1.672322  |
| C  | -5.445328 | -0.090052 | -0.311477 |
| C  | -5.166261 | 0.957933  | 1.844034  |
| C  | -6.009137 | 0.417366  | 0.857508  |
| H  | -3.134340 | 1.408031  | 2.444501  |
| H  | -5.595936 | 1.357371  | 2.767594  |
| H  | -7.091391 | 0.396658  | 1.006755  |
| H  | -6.056401 | -0.516237 | -1.110701 |

**6-Methyl-4-Quinazolinone (TS1)**

31

|    |           |           |           |
|----|-----------|-----------|-----------|
| Mo | 1.584888  | -0.193687 | 0.280317  |
| S  | 2.630821  | 0.005792  | -1.996412 |
| C  | 3.900116  | 1.201413  | -1.884843 |
| H  | 4.512582  | 1.351757  | -2.782730 |
| C  | 4.093524  | 1.951658  | -0.776456 |
| H  | 4.869080  | 2.727416  | -0.748288 |
| S  | 3.088781  | 1.798678  | 0.644828  |
| S  | 2.533670  | -1.868447 | 1.301492  |
| O  | 0.541777  | 0.610652  | 1.504896  |
| H  | -0.634776 | -0.029842 | 1.559551  |
| C  | -1.208254 | -1.726479 | 0.547126  |
| H  | -0.414248 | -2.351942 | 0.963823  |
| N  | -1.570785 | -0.629258 | 1.210989  |
| O  | 0.264244  | -0.936221 | -0.665516 |
| C  | -3.228613 | -1.711960 | -0.840767 |
| C  | -3.514871 | -0.399522 | -0.234265 |
| C  | -2.645460 | 0.113845  | 0.751848  |
| N  | -2.070290 | -2.312170 | -0.329591 |
| H  | -1.759898 | -3.149497 | -0.814384 |
| O  | -3.897438 | -2.267825 | -1.693126 |
| C  | -2.886049 | 1.402620  | 1.270378  |
| C  | -4.621523 | 0.352814  | -0.663889 |
| C  | -3.978329 | 2.130208  | 0.823138  |
| C  | -4.874725 | 1.619913  | -0.145839 |
| H  | -2.184074 | 1.814046  | 1.998712  |
| H  | -4.147229 | 3.134247  | 1.225940  |
| H  | -5.264241 | -0.087726 | -1.430467 |
| C  | -6.049873 | 2.448881  | -0.604543 |
| H  | -6.711482 | 2.711390  | 0.239383  |
| H  | -5.715346 | 3.398466  | -1.057328 |
| H  | -6.653909 | 1.913808  | -1.352869 |

---

**6-Methyl-4-Quinazolinone (TS2)**

31

|    |           |           |           |
|----|-----------|-----------|-----------|
| Mo | 1.824478  | 0.345856  | 0.027584  |
| S  | 3.063027  | 0.316476  | -2.092707 |
| C  | 4.756551  | 0.428749  | -1.603214 |
| H  | 5.481953  | 0.601458  | -2.407539 |
| C  | 5.152871  | 0.293689  | -0.322816 |
| H  | 6.214106  | 0.338119  | -0.049166 |
| S  | 4.021974  | -0.052311 | 0.991704  |
| S  | 0.820773  | -1.029358 | 1.544123  |
| O  | 1.357811  | 1.917758  | 0.452365  |
| H  | -0.971199 | 1.348106  | 0.286580  |
| C  | -0.920348 | -0.485766 | -0.619837 |
| H  | -0.481448 | -1.134854 | 0.593488  |
| N  | -1.589198 | 0.667881  | -0.155980 |
| O  | 0.279816  | -0.314038 | -1.117118 |
| C  | -3.158477 | -1.413186 | -1.255508 |
| C  | -3.767545 | -0.304476 | -0.473845 |
| C  | -2.942263 | 0.716113  | 0.058556  |
| N  | -1.781998 | -1.360866 | -1.326392 |
| H  | -1.318798 | -2.128008 | -1.804935 |
| O  | -3.799433 | -2.299552 | -1.801360 |
| C  | -3.550466 | 1.766582  | 0.774652  |
| C  | -5.152369 | -0.258050 | -0.289632 |
| C  | -4.932415 | 1.786840  | 0.944074  |
| C  | -5.765844 | 0.779482  | 0.420406  |
| H  | -2.926711 | 2.559657  | 1.195102  |
| H  | -5.380840 | 2.612384  | 1.506383  |
| C  | -7.263061 | 0.802540  | 0.621467  |
| H  | -5.738684 | -1.070051 | -0.729015 |
| H  | -7.593850 | 1.736725  | 1.102251  |
| H  | -7.801388 | 0.710605  | -0.337339 |
| H  | -7.598864 | -0.035017 | 1.258414  |

---

**6-Methoxy-4-Quinazolinone (TS1)**

32

|    |           |           |           |
|----|-----------|-----------|-----------|
| Mo | 1.868007  | -0.025370 | 0.130904  |
| S  | 2.807531  | 0.152206  | -2.196895 |
| C  | 3.939950  | 1.483048  | -2.200162 |
| H  | 4.502034  | 1.646952  | -3.128131 |
| C  | 4.085770  | 2.313553  | -1.142818 |
| H  | 4.771280  | 3.169190  | -1.187748 |
| S  | 3.152237  | 2.136852  | 0.323495  |
| S  | 3.020536  | -1.539565 | 1.198101  |
| O  | 0.795036  | 0.724003  | 1.355560  |
| H  | -0.311259 | -0.078498 | 1.512481  |
| C  | -0.670029 | -1.875412 | 0.612217  |
| H  | 0.226052  | -2.358471 | 1.011616  |
| N  | -1.153494 | -0.804973 | 1.243107  |
| O  | 0.601195  | -0.959277 | -0.718757 |
| C  | -2.744303 | -2.228448 | -0.647194 |
| C  | -3.187265 | -0.933611 | -0.090722 |
| C  | -2.347583 | -0.244093 | 0.814031  |
| N  | -1.487013 | -2.626253 | -0.180000 |
| H  | -1.085056 | -3.437523 | -0.641097 |
| O  | -3.372366 | -2.920711 | -1.426894 |
| C  | -2.741738 | 1.023528  | 1.273179  |
| C  | -4.406899 | -0.379655 | -0.493708 |
| C  | -3.951107 | 1.576408  | 0.861965  |
| C  | -4.799997 | 0.872693  | -0.019574 |
| H  | -2.069987 | 1.575118  | 1.934180  |
| H  | -4.223717 | 2.567305  | 1.226118  |
| O  | -6.002398 | 1.340707  | -0.463405 |
| H  | -5.037764 | -0.927043 | -1.195497 |
| C  | -6.429862 | 2.619385  | -0.063505 |
| H  | -7.404081 | 2.790737  | -0.543865 |
| H  | -6.558988 | 2.693395  | 1.033767  |
| H  | -5.730237 | 3.413673  | -0.387341 |

**6-Methoxy-4-Quinazolinone (TS2)**

32

|    |           |           |           |
|----|-----------|-----------|-----------|
| Mo | 2.164996  | 0.342863  | -0.019731 |
| S  | 3.492182  | -1.210685 | -1.384641 |
| C  | 5.161825  | -0.708581 | -1.102129 |
| H  | 5.919896  | -1.161395 | -1.752661 |
| C  | 5.504382  | 0.163363  | -0.134035 |
| H  | 6.552772  | 0.434933  | 0.040066  |
| S  | 4.322411  | 0.864141  | 0.978517  |
| S  | 1.102074  | 0.536323  | 1.987118  |
| O  | 1.682045  | 1.687324  | -0.927628 |
| H  | -0.699496 | 1.065346  | -0.661961 |
| C  | -0.540823 | -0.814803 | 0.122993  |
| H  | -0.154272 | -0.307144 | 1.406732  |
| N  | -1.268808 | 0.244403  | -0.459557 |
| O  | 0.678386  | -1.007633 | -0.319037 |
| C  | -2.709483 | -2.043124 | 0.383281  |
| C  | -3.396778 | -0.763284 | 0.055137  |
| C  | -2.635415 | 0.358139  | -0.358417 |
| N  | -1.335386 | -1.975072 | 0.310251  |
| H  | -0.821038 | -2.808776 | 0.579595  |
| O  | -3.292984 | -3.072927 | 0.686784  |
| C  | -3.317248 | 1.545708  | -0.677191 |
| C  | -4.787057 | -0.687674 | 0.136381  |
| C  | -4.709570 | 1.614722  | -0.592781 |
| C  | -5.458530 | 0.496175  | -0.184262 |
| H  | -2.746910 | 2.423174  | -0.992511 |
| H  | -5.200234 | 2.555578  | -0.845440 |
| O  | -6.822715 | 0.473117  | -0.073378 |
| H  | -5.344992 | -1.570610 | 0.452731  |
| C  | -7.549126 | 1.631704  | -0.388550 |
| H  | -8.611810 | 1.392401  | -0.235560 |
| H  | -7.282437 | 2.485756  | 0.264715  |
| H  | -7.405926 | 1.943681  | -1.442068 |

**6-Amino-4-Quinazolinone (TS1)**

30

|    |           |           |           |
|----|-----------|-----------|-----------|
| Mo | 1.617043  | -0.140330 | 0.155732  |
| S  | 2.538200  | -0.077942 | -2.188386 |
| C  | 3.822660  | 1.106932  | -2.209490 |
| H  | 4.389032  | 1.200561  | -3.144668 |
| C  | 4.081793  | 1.915408  | -1.156653 |
| H  | 4.865746  | 2.681077  | -1.213343 |
| S  | 3.151908  | 1.857057  | 0.321343  |
| S  | 2.613111  | -1.754620 | 1.235136  |
| O  | 0.638326  | 0.736747  | 1.369590  |
| H  | -0.582348 | 0.065644  | 1.536391  |
| C  | -1.125630 | -1.685448 | 0.660066  |
| H  | -0.292927 | -2.258251 | 1.077032  |
| N  | -1.488894 | -0.552929 | 1.261036  |
| O  | 0.259827  | -0.947618 | -0.682581 |
| C  | -3.202207 | -1.809287 | -0.635841 |
| C  | -3.496681 | -0.461451 | -0.112378 |
| C  | -2.602747 | 0.136225  | 0.800134  |
| N  | -2.014586 | -2.349885 | -0.130489 |
| H  | -1.703149 | -3.210109 | -0.572352 |
| O  | -3.891814 | -2.434699 | -1.421652 |
| C  | -2.856566 | 1.451796  | 1.232192  |
| C  | -4.630870 | 0.230034  | -0.562035 |
| C  | -3.977674 | 2.129290  | 0.777864  |
| C  | -4.891163 | 1.532636  | -0.127149 |
| H  | -2.142008 | 1.932318  | 1.903832  |
| H  | -4.158200 | 3.154169  | 1.117100  |
| N  | -6.037562 | 2.223710  | -0.531754 |
| H  | -5.286708 | -0.276696 | -1.274558 |
| H  | -5.943757 | 3.234616  | -0.540458 |
| H  | -6.449827 | 1.885868  | -1.395613 |

-----  
**6-Amino-4-Quinazolinone (TS2)**

30

|    |           |           |           |
|----|-----------|-----------|-----------|
| Mo | 1.850993  | 0.338542  | -0.082472 |
| S  | 3.054077  | -0.220691 | -2.150647 |
| C  | 4.754294  | 0.016146  | -1.735228 |
| H  | 5.465316  | -0.012626 | -2.569945 |
| C  | 5.173081  | 0.201957  | -0.468310 |
| H  | 6.238480  | 0.316705  | -0.233561 |
| S  | 4.066846  | 0.187605  | 0.911584  |
| S  | 0.872640  | -0.596062 | 1.751783  |
| O  | 1.387557  | 1.967620  | -0.068607 |
| H  | -0.951734 | 1.373321  | -0.059190 |
| C  | -0.897216 | -0.630958 | -0.454568 |
| H  | -0.444999 | -0.942327 | 0.872544  |
| N  | -1.568213 | 0.600110  | -0.308377 |
| O  | 0.296467  | -0.595908 | -0.998032 |
| C  | -3.134397 | -1.710376 | -0.772927 |
| C  | -3.740630 | -0.443225 | -0.283636 |
| C  | -2.919960 | 0.685829  | -0.063140 |
| N  | -1.762623 | -1.664831 | -0.896618 |
| H  | -1.298758 | -2.527572 | -1.165987 |
| O  | -3.777085 | -2.712387 | -1.053886 |
| C  | -3.531791 | 1.877405  | 0.374016  |
| C  | -5.122723 | -0.373896 | -0.077829 |
| C  | -4.906888 | 1.931541  | 0.578045  |
| C  | -5.734007 | 0.808383  | 0.355676  |
| H  | -2.914858 | 2.761669  | 0.553947  |
| H  | -5.357317 | 2.866290  | 0.927186  |
| N  | -7.112624 | 0.867870  | 0.619547  |
| H  | -5.703656 | -1.279563 | -0.271910 |
| H  | -7.524530 | 1.786165  | 0.482331  |
| H  | -7.654888 | 0.157938  | 0.136606  |

-----  
-----

*B3LYP transition state coordinates for an initial proton transfer and subsequent stepwise reaction for negatively charged xanthine*

**Xanthine (TS1)**

25

|    |           |           |           |
|----|-----------|-----------|-----------|
| Mo | 0.184551  | -0.180201 | 1.922863  |
| S  | -0.250152 | -0.790108 | 4.384172  |
| C  | -0.187562 | 0.700637  | 5.304267  |
| H  | -0.263234 | 0.605635  | 6.397368  |
| C  | -0.119657 | 1.918442  | 4.722028  |
| H  | -0.130845 | 2.835464  | 5.328063  |
| S  | -0.091075 | 2.126919  | 2.983021  |
| S  | -0.704298 | -2.209669 | 1.553127  |
| O  | -0.330200 | 0.741756  | 0.472538  |
| O  | 1.871144  | -0.383663 | 1.786186  |
| H  | -0.188980 | 0.544403  | -0.830472 |
| N  | -0.168632 | 1.609817  | -3.710867 |
| C  | -0.081080 | 0.377414  | -3.224039 |
| C  | 0.034157  | -0.820397 | -3.954297 |
| C  | 0.072624  | -0.821208 | -5.383163 |
| N  | -0.021835 | 0.493961  | -5.829441 |
| C  | -0.142822 | 1.713481  | -5.067184 |
| N  | 0.088425  | -1.856668 | -3.030091 |
| C  | 0.012322  | -1.322480 | -1.801762 |
| N  | -0.086405 | 0.004774  | -1.874829 |
| O  | 0.170075  | -1.789014 | -6.146694 |
| O  | -0.213599 | 2.757179  | -5.713617 |
| H  | -0.006033 | 0.629201  | -6.835299 |
| H  | 0.166950  | -2.840062 | -3.253182 |
| H  | -0.002453 | -1.875124 | -0.851109 |

---

**Xanthine (TS2)**

25

|    |           |           |           |
|----|-----------|-----------|-----------|
| Mo | 0.234442  | -0.404568 | 1.865050  |
| S  | -0.568794 | -0.042970 | 4.265700  |
| C  | -0.031085 | 1.561164  | 4.731468  |
| H  | -0.194782 | 1.845644  | 5.780592  |
| C  | 0.491401  | 2.443783  | 3.852487  |
| H  | 0.771137  | 3.457468  | 4.171427  |
| S  | 0.690558  | 2.077841  | 2.148071  |
| S  | -1.368460 | -1.959026 | 1.743571  |
| O  | 0.177947  | 0.102600  | 0.113239  |
| O  | 1.722566  | -1.195267 | 2.103411  |
| H  | -2.019009 | 0.869880  | -1.566910 |
| N  | -1.152816 | 1.254526  | -4.150066 |
| C  | -0.780419 | 0.371797  | -3.232206 |
| C  | 0.214119  | -0.606317 | -3.299336 |
| C  | 0.966508  | -0.770173 | -4.496082 |
| N  | 0.550280  | 0.192581  | -5.434514 |
| C  | -0.465487 | 1.188425  | -5.328458 |
| N  | 0.172222  | -1.324345 | -2.091348 |
| C  | -0.704265 | -0.738828 | -1.229345 |
| N  | -1.372230 | 0.209879  | -1.977712 |
| O  | 1.852486  | -1.592575 | -4.760130 |
| O  | -0.658369 | 1.914382  | -6.306532 |
| H  | 1.032037  | 0.168803  | -6.326974 |
| H  | 0.857063  | -2.004807 | -1.792666 |
| H  | -1.227176 | -1.339056 | -0.452623 |

---

**Xanthine (TS3)**

25

|    |           |           |           |
|----|-----------|-----------|-----------|
| Mo | 0.187205  | -0.432620 | 1.989746  |
| S  | -1.029182 | -0.040812 | 4.104827  |
| C  | -0.196646 | 1.320009  | 4.861422  |
| H  | -0.492632 | 1.560256  | 5.892135  |
| C  | 0.708598  | 2.078431  | 4.208954  |
| H  | 1.174661  | 2.944230  | 4.698971  |
| S  | 1.176722  | 1.781601  | 2.533717  |
| S  | -1.691066 | -1.327129 | 1.064074  |
| O  | 0.548489  | 0.103110  | 0.097528  |
| O  | 1.285637  | -1.671561 | 2.333330  |
| H  | -1.326305 | 1.488746  | -1.425428 |
| N  | -0.961802 | 1.416865  | -4.142048 |
| C  | -0.464922 | 0.648202  | -3.178864 |
| C  | 0.372418  | -0.473161 | -3.296811 |
| C  | 0.777869  | -0.920096 | -4.584336 |
| N  | 0.245306  | -0.061351 | -5.565841 |
| C  | -0.601349 | 1.073228  | -5.412885 |
| N  | 0.582434  | -0.981455 | -2.013979 |
| C  | -0.098908 | -0.228445 | -1.047267 |
| N  | -0.703613 | 0.801015  | -1.826720 |
| O  | 1.490302  | -1.887266 | -4.890974 |
| O  | -0.952340 | 1.667239  | -6.436597 |
| H  | 0.484172  | -0.291874 | -6.524360 |
| H  | 1.248856  | -1.697523 | -1.763586 |
| H  | -1.070201 | -0.938391 | -0.470322 |

-----  
-----

*B3LYP-D3 transition state coordinates for an initial proton transfer and subsequent stepwise reaction for negatively charged xanthine.*



**Xanthine (TS1)**

25

|    |           |           |           |
|----|-----------|-----------|-----------|
| Mo | 0.139972  | -0.173149 | 1.903244  |
| S  | -0.237558 | -0.798060 | 4.377295  |
| C  | -0.158155 | 0.691476  | 5.300426  |
| H  | -0.211684 | 0.594824  | 6.394879  |
| C  | -0.102162 | 1.912423  | 4.721537  |
| H  | -0.101377 | 2.825552  | 5.333933  |
| S  | -0.106566 | 2.131360  | 2.981967  |
| S  | -0.773665 | -2.190533 | 1.528404  |
| O  | -0.388314 | 0.763474  | 0.468299  |
| O  | 1.821998  | -0.386258 | 1.733891  |
| H  | -0.214463 | 0.552763  | -0.835613 |
| N  | -0.177407 | 1.609313  | -3.706366 |
| C  | -0.080492 | 0.378627  | -3.217612 |
| C  | 0.049531  | -0.819736 | -3.944514 |
| C  | 0.091572  | -0.824603 | -5.372662 |
| N  | -0.013415 | 0.488623  | -5.823364 |
| C  | -0.147238 | 1.709881  | -5.063516 |
| N  | 0.108576  | -1.853618 | -3.018219 |
| C  | 0.021955  | -1.318985 | -1.790605 |
| N  | -0.088344 | 0.007513  | -1.868212 |
| O  | 0.199073  | -1.794673 | -6.131876 |
| O  | -0.224038 | 2.751320  | -5.712618 |
| H  | 0.004538  | 0.620041  | -6.829464 |
| H  | 0.196217  | -2.836094 | -3.241406 |
| H  | 0.002833  | -1.870996 | -0.840244 |

---

**Xanthine (TS2)**

25

|    |           |           |           |
|----|-----------|-----------|-----------|
| Mo | 0.231277  | -0.406748 | 1.845457  |
| S  | -0.492654 | -0.065605 | 4.284974  |
| C  | 0.007087  | 1.559661  | 4.720430  |
| H  | -0.127519 | 1.847467  | 5.773166  |
| C  | 0.468238  | 2.454636  | 3.818664  |
| H  | 0.725782  | 3.478240  | 4.125153  |
| S  | 0.622066  | 2.087172  | 2.108204  |
| S  | -1.358717 | -1.975776 | 1.749802  |
| O  | 0.151330  | 0.097893  | 0.094650  |
| O  | 1.733899  | -1.175390 | 2.058189  |
| H  | -2.027450 | 0.868095  | -1.560958 |
| N  | -1.142195 | 1.263814  | -4.137585 |
| C  | -0.790461 | 0.367112  | -3.225273 |
| C  | 0.196027  | -0.619305 | -3.290929 |
| C  | 0.968039  | -0.773100 | -4.475933 |
| N  | 0.562348  | 0.193195  | -5.415797 |
| C  | -0.434229 | 1.209250  | -5.304944 |
| N  | 0.141021  | -1.344707 | -2.088701 |
| C  | -0.738376 | -0.756649 | -1.232577 |
| N  | -1.403753 | 0.192789  | -1.982268 |
| O  | 1.858496  | -1.593561 | -4.730375 |
| O  | -0.597176 | 1.957231  | -6.271735 |
| H  | 1.070207  | 0.187475  | -6.293810 |
| H  | 0.829648  | -2.016853 | -1.780664 |
| H  | -1.263057 | -1.355493 | -0.457026 |

---

**Xanthine (TS3)**

25

|    |           |           |           |
|----|-----------|-----------|-----------|
| Mo | 0.180647  | -0.433223 | 1.984454  |
| S  | -1.033327 | -0.044827 | 4.106788  |
| C  | -0.197283 | 1.318484  | 4.858616  |
| H  | -0.488618 | 1.561353  | 5.890357  |
| C  | 0.707181  | 2.077020  | 4.203000  |
| H  | 1.173613  | 2.942457  | 4.693938  |
| S  | 1.173640  | 1.779737  | 2.525453  |
| S  | -1.696806 | -1.317971 | 1.044521  |
| O  | 0.555918  | 0.102006  | 0.097209  |
| O  | 1.275081  | -1.674543 | 2.327974  |
| H  | -1.319565 | 1.487499  | -1.414266 |
| N  | -0.963484 | 1.417000  | -4.137277 |
| C  | -0.463258 | 0.649991  | -3.174235 |
| C  | 0.374369  | -0.471709 | -3.293404 |
| C  | 0.777602  | -0.920089 | -4.580482 |
| N  | 0.241829  | -0.063688 | -5.562598 |
| C  | -0.605978 | 1.071066  | -5.408844 |
| N  | 0.587780  | -0.980264 | -2.012102 |
| C  | -0.091105 | -0.226342 | -1.046754 |
| N  | -0.697230 | 0.803675  | -1.821776 |
| O  | 1.490913  | -1.887203 | -4.885174 |
| O  | -0.960374 | 1.662957  | -6.432801 |
| H  | 0.479199  | -0.295969 | -6.520956 |
| H  | 1.259938  | -1.689559 | -1.759413 |
| H  | -1.066975 | -0.936609 | -0.477541 |

-----  
-----

*B3LYP transition state coordinates for a concerted reaction mechanism for 6-substituted quinazolines.*

**6-Nitro-quinazoline (C2 - Secondary SOM)**

29

|    |           |           |           |
|----|-----------|-----------|-----------|
| Mo | 2.571973  | -0.475361 | -0.158768 |
| S  | 4.487019  | -0.283196 | 1.286800  |
| C  | 5.414857  | 1.065432  | 0.618499  |
| H  | 6.414165  | 1.213691  | 1.044334  |
| C  | 4.916475  | 1.913058  | -0.299460 |
| H  | 5.492540  | 2.767824  | -0.670601 |
| S  | 3.304258  | 1.703188  | -0.993433 |
| S  | 1.266036  | -1.224211 | 1.540501  |
| O  | 0.641593  | 0.397754  | -0.727116 |
| H  | 0.628023  | 1.364272  | -0.589938 |
| C  | -0.638757 | -0.079782 | -0.250774 |
| H  | -0.083383 | -0.708511 | 0.867275  |
| N  | -1.430679 | 0.952520  | 0.135640  |
| O  | 2.916875  | -1.717503 | -1.236280 |
| C  | -2.358121 | -1.367749 | -1.026050 |
| C  | -3.311457 | -0.474551 | -0.413819 |
| C  | -2.751314 | 0.744870  | 0.117901  |
| N  | -1.080264 | -1.165481 | -1.005130 |
| C  | -3.661543 | 1.732640  | 0.617521  |
| C  | -4.692215 | -0.691903 | -0.410724 |
| C  | -5.017994 | 1.502546  | 0.623436  |
| C  | -5.536717 | 0.284563  | 0.113946  |
| H  | -3.239439 | 2.660665  | 1.008444  |
| H  | -5.721277 | 2.237470  | 1.015421  |
| N  | -6.970230 | 0.059467  | 0.125722  |
| H  | -5.122128 | -1.608156 | -0.818499 |
| O  | -7.691762 | 0.943559  | 0.584437  |
| O  | -7.395892 | -1.002923 | -0.323974 |
| H  | -2.727379 | -2.245516 | -1.577353 |

---

**6-Nitro-quinazoline (C4 - Primary SOM)**

29

|    |           |           |           |
|----|-----------|-----------|-----------|
| Mo | 1.635282  | -0.348848 | 0.139681  |
| S  | 3.783515  | -0.593002 | 1.187408  |
| C  | 4.943868  | -0.450255 | -0.140293 |
| H  | 5.983775  | -0.693446 | 0.107163  |
| C  | 4.605096  | -0.002449 | -1.362373 |
| H  | 5.345708  | 0.117692  | -2.160451 |
| S  | 2.935656  | 0.401164  | -1.784511 |
| S  | 0.734417  | 0.611894  | 1.988406  |
| O  | 0.151334  | 0.978474  | -0.793733 |
| H  | 0.599041  | 1.715582  | -1.255001 |
| C  | -0.953019 | 1.608637  | -0.092768 |
| H  | -0.413784 | 1.348171  | 1.164696  |
| N  | -0.960076 | 2.948266  | -0.302115 |
| O  | 1.000563  | -1.892574 | -0.071352 |
| C  | -3.392592 | 1.705011  | 0.021741  |
| N  | -3.325867 | 3.065883  | 0.028032  |
| C  | -2.122649 | 3.585573  | -0.180157 |
| C  | -2.228586 | 0.878124  | -0.115452 |
| C  | -2.349563 | -0.517470 | -0.201244 |
| C  | -4.663860 | 1.071681  | 0.105962  |
| C  | -4.780414 | -0.300511 | 0.035799  |
| C  | -3.619862 | -1.084268 | -0.130169 |
| H  | -5.539176 | 1.715850  | 0.211592  |
| H  | -5.745921 | -0.802679 | 0.092385  |
| N  | -3.768513 | -2.538457 | -0.239266 |
| H  | -1.478799 | -1.165040 | -0.320052 |
| H  | -2.075627 | 4.679678  | -0.279488 |
| O  | -4.896343 | -3.007720 | -0.106665 |
| O  | -2.769900 | -3.206503 | -0.461229 |

---

**6-Amino-quinazoline (C2 - Secondary SOM)**

29

|    |           |           |           |
|----|-----------|-----------|-----------|
| Mo | 2.024134  | -0.475000 | -0.178297 |
| S  | 4.010634  | -0.302413 | 1.189835  |
| C  | 4.845934  | 1.138191  | 0.595034  |
| H  | 5.852266  | 1.307080  | 0.997392  |
| C  | 4.276268  | 2.023550  | -0.242886 |
| H  | 4.799665  | 2.930355  | -0.567101 |
| S  | 2.652034  | 1.784330  | -0.898502 |
| S  | 0.827518  | -1.372579 | 1.522034  |
| O  | 0.067608  | 0.334610  | -0.647205 |
| H  | 0.014491  | 1.298001  | -0.505141 |
| C  | -1.208476 | -0.190141 | -0.108595 |
| H  | -0.601471 | -0.833133 | 0.900689  |
| N  | -1.983141 | 0.829638  | 0.329879  |
| O  | 2.357907  | -1.631945 | -1.352377 |
| C  | -2.966743 | -1.383022 | -0.973903 |
| C  | -3.906037 | -0.495290 | -0.341054 |
| C  | -3.318256 | 0.661634  | 0.267829  |
| N  | -1.682352 | -1.226420 | -0.919552 |
| C  | -4.212739 | 1.641965  | 0.792038  |
| C  | -5.304640 | -0.660449 | -0.392512 |
| C  | -5.579717 | 1.454773  | 0.742084  |
| C  | -6.159702 | 0.296105  | 0.150922  |
| H  | -3.779759 | 2.536227  | 1.246334  |
| H  | -6.244417 | 2.212009  | 1.172169  |
| N  | -7.554611 | 0.122467  | 0.174734  |
| H  | -5.715997 | -1.554988 | -0.873885 |
| H  | -3.349611 | -2.221810 | -1.577133 |
| H  | -8.079335 | 0.991822  | 0.138379  |
| H  | -7.899730 | -0.528621 | -0.524510 |

-----  
**6-Amino-quinazoline (C4 - Primary SOM)**

29

|    |           |           |           |
|----|-----------|-----------|-----------|
| Mo | 1.425142  | -0.363953 | 0.133825  |
| S  | 3.607465  | -0.433024 | 1.154528  |
| C  | 4.718032  | 0.106285  | -0.112694 |
| H  | 5.786148  | 0.006746  | 0.114566  |
| C  | 4.300200  | 0.673390  | -1.258671 |
| H  | 5.005971  | 1.039728  | -2.012567 |
| S  | 2.584521  | 0.854006  | -1.643925 |
| S  | 0.402613  | 0.138968  | 2.087928  |
| O  | -0.223330 | 0.834649  | -0.616232 |
| H  | 0.072118  | 1.694214  | -0.973236 |
| C  | -1.451941 | 1.177343  | 0.156212  |
| H  | -0.887262 | 0.838421  | 1.322168  |
| N  | -1.686296 | 2.507734  | 0.091593  |
| O  | 1.037072  | -1.944100 | -0.319723 |
| C  | -3.868966 | 0.840949  | -0.042412 |
| N  | -4.058477 | 2.195940  | 0.058611  |
| C  | -2.960028 | 2.925508  | 0.095829  |
| C  | -2.573426 | 0.245427  | -0.047436 |
| C  | -2.417436 | -1.141850 | -0.196364 |
| C  | -4.986513 | -0.020356 | -0.190876 |
| C  | -4.825714 | -1.386144 | -0.334295 |
| C  | -3.532046 | -1.972859 | -0.345087 |
| H  | -5.978592 | 0.437988  | -0.193537 |
| H  | -5.703710 | -2.032185 | -0.441067 |
| N  | -3.388670 | -3.356795 | -0.450135 |
| H  | -1.416565 | -1.579744 | -0.212202 |
| H  | -3.095522 | 4.017214  | 0.115829  |
| H  | -4.104363 | -3.830519 | -0.991225 |
| H  | -2.453859 | -3.671096 | -0.691522 |

-----  
-----

*B3LYP-D3 transition state coordinates for a concerted reaction mechanism for 6-substituted quinazolines.*

**6-Nitro-quinazoline (C2 - Secondary SOM)**

29

|    |           |           |           |
|----|-----------|-----------|-----------|
| Mo | 2.551986  | -0.440548 | -0.243693 |
| S  | 4.489977  | -0.419247 | 1.188018  |
| C  | 5.429847  | 0.975612  | 0.638508  |
| H  | 6.437034  | 1.069789  | 1.061931  |
| C  | 4.933621  | 1.915591  | -0.187140 |
| H  | 5.521331  | 2.792526  | -0.480910 |
| S  | 3.309176  | 1.797612  | -0.879893 |
| S  | 1.246906  | -1.327495 | 1.388250  |
| O  | 0.632422  | 0.500170  | -0.725463 |
| H  | 0.619185  | 1.447610  | -0.491181 |
| C  | -0.643551 | -0.020528 | -0.290058 |
| H  | -0.100742 | -0.739304 | 0.771786  |
| N  | -1.439590 | 0.970528  | 0.185861  |
| O  | 2.856919  | -1.580587 | -1.437595 |
| C  | -2.350913 | -1.256136 | -1.163001 |
| C  | -3.306766 | -0.431310 | -0.464389 |
| C  | -2.756767 | 0.745413  | 0.166266  |
| N  | -1.075804 | -1.041327 | -1.136097 |
| C  | -3.673953 | 1.671515  | 0.760928  |
| C  | -4.683572 | -0.667143 | -0.468547 |
| C  | -5.027054 | 1.422248  | 0.759673  |
| C  | -5.535707 | 0.247427  | 0.147946  |
| H  | -3.259774 | 2.566947  | 1.228747  |
| H  | -5.734630 | 2.109879  | 1.223178  |
| N  | -6.966773 | 0.002602  | 0.150719  |
| H  | -5.103595 | -1.549668 | -0.953835 |
| O  | -7.696097 | 0.832439  | 0.691737  |
| O  | -7.383032 | -1.021162 | -0.388970 |
| H  | -2.717258 | -2.085601 | -1.786262 |

-----  
**6-Nitro-quinazoline (C4 - Primary SOM)**

29

|    |           |           |           |
|----|-----------|-----------|-----------|
| Mo | 1.625056  | -0.313900 | 0.170229  |
| S  | 3.754976  | -0.616984 | 1.245294  |
| C  | 4.932286  | -0.487579 | -0.070996 |
| H  | 5.964266  | -0.757990 | 0.182279  |
| C  | 4.617545  | -0.018971 | -1.292520 |
| H  | 5.371053  | 0.089213  | -2.080530 |
| S  | 2.961669  | 0.427632  | -1.731530 |
| S  | 0.707068  | 0.645850  | 2.009574  |
| O  | 0.163522  | 1.027354  | -0.782102 |
| H  | 0.611571  | 1.773361  | -1.227233 |
| C  | -0.951002 | 1.641442  | -0.086644 |
| H  | -0.430603 | 1.391022  | 1.174008  |
| N  | -0.980230 | 2.982011  | -0.289934 |
| O  | 0.963720  | -1.842264 | -0.063566 |
| C  | -3.388107 | 1.686056  | 0.039282  |
| N  | -3.347109 | 3.048425  | 0.059536  |
| C  | -2.155640 | 3.593511  | -0.155079 |
| C  | -2.209155 | 0.885604  | -0.114965 |
| C  | -2.294558 | -0.509973 | -0.217403 |
| C  | -4.643913 | 1.023234  | 0.123325  |
| C  | -4.728133 | -0.350994 | 0.037568  |
| C  | -3.550963 | -1.106704 | -0.144189 |
| H  | -5.534250 | 1.644228  | 0.241458  |
| H  | -5.682264 | -0.874567 | 0.093802  |
| N  | -3.665596 | -2.563251 | -0.273835 |
| H  | -1.408169 | -1.133098 | -0.348111 |
| H  | -2.131805 | 4.688933  | -0.245580 |
| O  | -4.779778 | -3.062885 | -0.135068 |
| O  | -2.653590 | -3.202757 | -0.518122 |

-----

**6-Amino-quinazoline (C2 - Secondary SOM)**

29

|    |           |           |           |
|----|-----------|-----------|-----------|
| Mo | 2.006298  | -0.460468 | -0.213695 |
| S  | 4.014112  | -0.353254 | 1.135444  |
| C  | 4.848009  | 1.107800  | 0.586996  |
| H  | 5.860296  | 1.258003  | 0.982355  |
| C  | 4.272043  | 2.029096  | -0.207972 |
| H  | 4.797410  | 2.945933  | -0.499968 |
| S  | 2.637817  | 1.824348  | -0.853810 |
| S  | 0.823412  | -1.419507 | 1.457253  |
| O  | 0.054021  | 0.376136  | -0.640611 |
| H  | -0.005224 | 1.331539  | -0.455146 |
| C  | -1.217892 | -0.176252 | -0.117884 |
| H  | -0.623144 | -0.849127 | 0.861947  |
| N  | -1.995711 | 0.826543  | 0.356500  |
| O  | 2.323665  | -1.570566 | -1.435205 |
| C  | -2.967476 | -1.339187 | -1.035786 |
| C  | -3.910601 | -0.480744 | -0.368444 |
| C  | -3.329130 | 0.654899  | 0.285754  |
| N  | -1.684154 | -1.181838 | -0.973033 |
| C  | -4.229251 | 1.609000  | 0.847237  |
| C  | -5.307681 | -0.651325 | -0.427879 |
| C  | -5.595262 | 1.416253  | 0.788881  |
| C  | -6.168637 | 0.278756  | 0.151471  |
| H  | -3.801229 | 2.486231  | 1.337999  |
| H  | -6.264242 | 2.151835  | 1.248919  |
| N  | -7.563254 | 0.097035  | 0.166481  |
| H  | -5.713114 | -1.528430 | -0.944769 |
| H  | -3.348343 | -2.153119 | -1.673376 |
| H  | -8.092054 | 0.964737  | 0.157311  |
| H  | -7.903376 | -0.530237 | -0.556648 |

-----

**6-Amino-quinazoline (C4 - Primary SOM)**

29

|    |           |           |           |
|----|-----------|-----------|-----------|
| Mo | 1.434738  | -0.341271 | 0.184978  |
| S  | 3.603667  | -0.425049 | 1.240475  |
| C  | 4.737904  | 0.069626  | -0.026004 |
| H  | 5.802197  | -0.042928 | 0.213913  |
| C  | 4.343212  | 0.618214  | -1.189928 |
| H  | 5.065957  | 0.954643  | -1.942024 |
| S  | 2.634361  | 0.819032  | -1.602628 |
| S  | 0.378971  | 0.223218  | 2.103454  |
| O  | -0.198080 | 0.831664  | -0.632172 |
| H  | 0.090416  | 1.682781  | -1.013105 |
| C  | -1.439834 | 1.190971  | 0.113127  |
| H  | -0.891747 | 0.913158  | 1.295969  |
| N  | -1.694961 | 2.512501  | -0.019894 |
| O  | 1.034884  | -1.926212 | -0.237967 |
| C  | -3.845466 | 0.796354  | -0.103936 |
| N  | -4.061458 | 2.151505  | -0.082131 |
| C  | -2.977311 | 2.903499  | -0.062115 |
| C  | -2.539267 | 0.228674  | -0.054005 |
| C  | -2.349192 | -1.159452 | -0.112782 |
| C  | -4.941920 | -0.096536 | -0.218542 |
| C  | -4.748983 | -1.464986 | -0.274600 |
| C  | -3.442817 | -2.022622 | -0.227556 |
| H  | -5.943726 | 0.337669  | -0.264320 |
| H  | -5.610811 | -2.135985 | -0.355762 |
| N  | -3.266211 | -3.406554 | -0.243261 |
| H  | -1.339186 | -1.573069 | -0.085817 |
| H  | -3.133865 | 3.991759  | -0.101179 |
| H  | -3.959747 | -3.930372 | -0.766737 |
| H  | -2.319699 | -3.712189 | -0.447466 |

-----

-----



*B3LYP transition state coordinates for a concerted reaction mechanism for quinazoline.*

**Quinazoline (C2 - Secondary SOM)**

27

|    |           |           |           |
|----|-----------|-----------|-----------|
| Mo | 1.697606  | -0.479248 | -0.267274 |
| S  | 3.674845  | -0.414661 | 1.118775  |
| C  | 4.524318  | 1.055564  | 0.627261  |
| H  | 5.529050  | 1.189247  | 1.046269  |
| C  | 3.963298  | 2.001419  | -0.148028 |
| H  | 4.492856  | 2.925685  | -0.405417 |
| S  | 2.341707  | 1.817216  | -0.828150 |
| S  | 0.489254  | -1.477271 | 1.366420  |
| O  | -0.258053 | 0.375277  | -0.679042 |
| H  | -0.296718 | 1.325907  | -0.462109 |
| C  | -1.531460 | -0.169757 | -0.183744 |
| H  | -0.925027 | -0.901135 | 0.791951  |
| N  | -2.294011 | 0.820908  | 0.335785  |
| O  | 2.034131  | -1.558890 | -1.511720 |
| C  | -3.300297 | -1.298644 | -1.098479 |
| C  | -4.226130 | -0.453738 | -0.391730 |
| C  | -3.629411 | 0.661067  | 0.290671  |
| N  | -2.014661 | -1.149322 | -1.055437 |
| C  | -4.504733 | 1.604277  | 0.909868  |
| C  | -5.625903 | -0.609601 | -0.424337 |
| C  | -5.874747 | 1.420778  | 0.870255  |
| C  | -6.452216 | 0.310812  | 0.205230  |
| H  | -4.052723 | 2.457677  | 1.420705  |
| H  | -6.528610 | 2.148997  | 1.360906  |
| H  | -7.538350 | 0.188607  | 0.185146  |
| H  | -6.050578 | -1.465980 | -0.959681 |
| H  | -3.696344 | -2.094901 | -1.748705 |

-----  
**Quinazoline (C4 - Primary SOM)**

27

|    |           |           |           |
|----|-----------|-----------|-----------|
| Mo | 1.411628  | -0.492726 | 0.178350  |
| S  | 3.558889  | -0.331779 | 1.258995  |
| C  | 4.666187  | 0.204559  | -0.011854 |
| H  | 5.731345  | 0.196126  | 0.248171  |
| C  | 4.243354  | 0.666926  | -1.201977 |
| H  | 4.942814  | 1.034183  | -1.961102 |
| S  | 2.530896  | 0.697909  | -1.640499 |
| S  | 0.302009  | 0.060284  | 2.071014  |
| O  | -0.305137 | 0.534131  | -0.682827 |
| H  | -0.052993 | 1.389770  | -1.081474 |
| C  | -1.558536 | 0.839497  | 0.042901  |
| H  | -0.998768 | 0.608698  | 1.245374  |
| N  | -1.869778 | 2.150263  | -0.094109 |
| O  | 1.149042  | -2.119217 | -0.182685 |
| C  | -3.954453 | 0.351153  | -0.092306 |
| N  | -4.219639 | 1.696878  | -0.048809 |
| C  | -3.164225 | 2.489344  | -0.083935 |
| C  | -2.623186 | -0.164403 | -0.108915 |
| C  | -2.399044 | -1.552247 | -0.204864 |
| C  | -5.032800 | -0.568839 | -0.162416 |
| C  | -4.796343 | -1.930882 | -0.251886 |
| C  | -3.476253 | -2.427704 | -0.279763 |
| H  | -6.044728 | -0.156826 | -0.151967 |
| H  | -5.639009 | -2.627245 | -0.307127 |
| H  | -3.296439 | -3.503301 | -0.358793 |
| H  | -1.377480 | -1.939056 | -0.225486 |
| H  | -3.365018 | 3.570450  | -0.125367 |

-----

**Quinazoline (C5)**

27

|    |           |           |           |
|----|-----------|-----------|-----------|
| Mo | 1.494417  | -0.532449 | 0.242112  |
| S  | 3.639823  | -0.182010 | 1.275312  |
| C  | 4.696834  | 0.359547  | -0.036649 |
| H  | 5.763284  | 0.432032  | 0.207825  |
| C  | 4.233220  | 0.728363  | -1.244289 |
| H  | 4.898331  | 1.097551  | -2.032784 |
| S  | 2.513321  | 0.636073  | -1.648388 |
| S  | 0.338761  | 0.045937  | 2.124834  |
| O  | -0.308062 | 0.318728  | -0.617716 |
| H  | -0.234913 | 0.788524  | -1.463542 |
| C  | -1.548219 | 0.767804  | 0.080385  |
| H  | -0.956987 | 0.486169  | 1.290931  |
| C  | -1.804247 | 2.167077  | 0.000555  |
| O  | 1.361896  | -2.187923 | -0.039844 |
| C  | -4.022621 | 0.411643  | -0.141614 |
| C  | -4.222015 | 1.814749  | -0.093197 |
| C  | -3.113531 | 2.656681  | -0.038277 |
| C  | -2.693033 | -0.123394 | -0.099074 |
| C  | -2.577796 | -1.525156 | -0.202374 |
| N  | -5.092316 | -0.428453 | -0.261326 |
| C  | -4.837350 | -1.716829 | -0.338532 |
| N  | -3.631227 | -2.324836 | -0.324881 |
| H  | -5.705440 | -2.385717 | -0.428876 |
| H  | -1.586980 | -1.995867 | -0.190245 |
| H  | -3.264484 | 3.741170  | -0.027738 |
| H  | -5.243825 | 2.195266  | -0.132495 |
| H  | -0.953619 | 2.851076  | 0.063919  |

---

**Quinazoline (C6)**

27

|    |           |           |           |
|----|-----------|-----------|-----------|
| Mo | 1.824616  | -0.489189 | -0.197677 |
| S  | 3.812354  | -0.309151 | 1.153714  |
| C  | 4.598871  | 1.183379  | 0.618533  |
| H  | 5.599149  | 1.369635  | 1.027360  |
| C  | 3.999089  | 2.077713  | -0.187409 |
| H  | 4.487890  | 3.014465  | -0.477944 |
| S  | 2.380668  | 1.802773  | -0.846235 |
| S  | 0.629260  | -1.510308 | 1.459700  |
| O  | -0.161937 | 0.232447  | -0.629383 |
| H  | -0.272217 | 1.151427  | -0.920233 |
| C  | -1.469611 | -0.268915 | -0.082506 |
| H  | -0.771763 | -0.999349 | 0.865945  |
| C  | -2.296868 | 0.726020  | 0.498006  |
| O  | 2.177099  | -1.583843 | -1.428109 |
| C  | -3.468301 | -1.319406 | -1.074653 |
| C  | -4.319345 | -0.378238 | -0.407356 |
| C  | -3.699267 | 0.655650  | 0.375448  |
| C  | -2.109800 | -1.242702 | -0.954737 |
| C  | -4.612406 | 1.563020  | 0.988141  |
| N  | -5.662658 | -0.462046 | -0.529862 |
| N  | -5.921492 | 1.466795  | 0.859811  |
| C  | -6.385561 | 0.446968  | 0.099595  |
| H  | -4.222021 | 2.386257  | 1.603585  |
| H  | -7.476620 | 0.375577  | 0.001491  |
| H  | -3.944454 | -2.084826 | -1.692293 |
| H  | -1.841515 | 1.504698  | 1.118397  |
| H  | -1.455989 | -1.948765 | -1.474786 |

---

**Quinazoline (C7)**

27

|    |           |           |           |
|----|-----------|-----------|-----------|
| Mo | 1.769732  | -0.446242 | -0.207783 |
| S  | 3.787076  | -0.275899 | 1.099236  |
| C  | 4.589734  | 1.187528  | 0.510506  |
| H  | 5.606024  | 1.358538  | 0.885093  |
| C  | 3.985308  | 2.081503  | -0.292396 |
| H  | 4.485079  | 3.001491  | -0.615558 |
| S  | 2.342716  | 1.829865  | -0.897744 |
| S  | 0.599905  | -1.435337 | 1.479798  |
| O  | -0.212711 | 0.302998  | -0.604454 |
| H  | -0.314033 | 1.249989  | -0.792580 |
| C  | -1.504626 | -0.229181 | -0.062137 |
| H  | -0.806526 | -0.926314 | 0.903931  |
| C  | -2.369662 | 0.747400  | 0.499636  |
| O  | 2.073994  | -1.563511 | -1.430602 |
| C  | -3.445233 | -1.355858 | -1.063470 |
| C  | -4.328473 | -0.426608 | -0.423191 |
| C  | -3.764918 | 0.642020  | 0.360318  |
| C  | -2.093147 | -1.244225 | -0.925825 |
| N  | -4.596286 | 1.551556  | 0.957384  |
| C  | -5.729337 | -0.462180 | -0.514661 |
| C  | -5.889793 | 1.388624  | 0.783364  |
| N  | -6.523795 | 0.424233  | 0.075560  |
| H  | -3.872160 | -2.153304 | -1.680807 |
| H  | -1.966961 | 1.554677  | 1.116703  |
| H  | -1.408458 | -1.937556 | -1.421906 |
| H  | -6.212018 | -1.257690 | -1.101650 |
| H  | -6.545964 | 2.124146  | 1.271087  |

**Quinazoline (C8)**

27

|    |           |           |           |
|----|-----------|-----------|-----------|
| Mo | 1.520135  | -0.617317 | 0.295320  |
| S  | 3.623825  | -0.011024 | 1.302940  |
| C  | 4.631642  | 0.545293  | -0.040490 |
| H  | 5.686529  | 0.726880  | 0.198241  |
| C  | 4.143466  | 0.798326  | -1.268586 |
| H  | 4.778782  | 1.178386  | -2.076436 |
| S  | 2.442644  | 0.526243  | -1.669812 |
| S  | 0.334467  | -0.062976 | 2.167488  |
| O  | -0.322837 | 0.149018  | -0.579812 |
| H  | -0.221410 | 0.625835  | -1.419303 |
| C  | -1.533423 | 0.645017  | 0.109550  |
| H  | -0.975937 | 0.311109  | 1.327763  |
| C  | -1.715869 | 2.059626  | 0.047468  |
| O  | 1.565098  | -2.285543 | 0.095895  |
| C  | -4.021255 | 0.452234  | -0.090573 |
| C  | -4.146632 | 1.864416  | -0.018795 |
| C  | -2.989951 | 2.636774  | 0.031489  |
| C  | -2.733108 | -0.177185 | -0.080967 |
| N  | -2.612451 | -1.512663 | -0.199826 |
| C  | -5.118455 | -0.441713 | -0.220402 |
| N  | -4.985331 | -1.749387 | -0.330165 |
| C  | -3.717557 | -2.223267 | -0.319124 |
| H  | -3.070117 | 3.728329  | 0.054972  |
| H  | -5.138684 | 2.323703  | -0.036640 |
| H  | -0.823400 | 2.688184  | 0.109736  |
| H  | -3.603487 | -3.310039 | -0.417778 |
| H  | -6.140029 | -0.034082 | -0.237336 |

*B3LYP-D3 transition state coordinates for a concerted reaction mechanism for quinazoline.*

**Quinazoline (C2 - Secondary SOM)**

27

|    |           |           |           |
|----|-----------|-----------|-----------|
| Mo | 1.682035  | -0.472099 | -0.257936 |
| S  | 3.666883  | -0.431946 | 1.122447  |
| C  | 4.535842  | 1.024581  | 0.618384  |
| H  | 5.545376  | 1.145211  | 1.030297  |
| C  | 3.988179  | 1.974433  | -0.162695 |
| H  | 4.534169  | 2.887517  | -0.426677 |
| S  | 2.358775  | 1.815089  | -0.833678 |
| S  | 0.461589  | -1.457869 | 1.374156  |
| O  | -0.256169 | 0.419888  | -0.660868 |
| H  | -0.295805 | 1.366261  | -0.427580 |
| C  | -1.531200 | -0.130921 | -0.181728 |
| H  | -0.949259 | -0.862373 | 0.797184  |
| N  | -2.303166 | 0.854415  | 0.336351  |
| O  | 1.994928  | -1.555968 | -1.503415 |
| C  | -3.280557 | -1.275916 | -1.108091 |
| C  | -4.216014 | -0.449417 | -0.391689 |
| C  | -3.635428 | 0.676218  | 0.288558  |
| N  | -1.997449 | -1.108821 | -1.066074 |
| C  | -4.525606 | 1.607370  | 0.904585  |
| C  | -5.612408 | -0.630491 | -0.418440 |
| C  | -5.892529 | 1.400478  | 0.868828  |
| C  | -6.452988 | 0.276806  | 0.211837  |
| H  | -4.086939 | 2.469979  | 1.411564  |
| H  | -6.557155 | 2.118167  | 1.360441  |
| H  | -7.536749 | 0.134930  | 0.196481  |
| H  | -6.023266 | -1.495522 | -0.950580 |
| H  | -3.668002 | -2.069708 | -1.766271 |

---

**Quinazoline (C4 - Primary SOM)**

27

|    |           |           |           |
|----|-----------|-----------|-----------|
| Mo | 1.292885  | -0.404064 | -0.012691 |
| S  | 3.457353  | -0.549488 | 1.040406  |
| C  | 4.551646  | 0.283563  | -0.074421 |
| H  | 5.620935  | 0.202159  | 0.155063  |
| C  | 4.118733  | 1.037018  | -1.102177 |
| H  | 4.815442  | 1.577453  | -1.752902 |
| S  | 2.400443  | 1.198170  | -1.493835 |
| S  | 0.204133  | -0.330946 | 1.970944  |
| O  | -0.434557 | 0.800318  | -0.580609 |
| H  | -0.192607 | 1.729602  | -0.759290 |
| C  | -1.675335 | 0.913619  | 0.212168  |
| H  | -1.104739 | 0.405180  | 1.325292  |
| N  | -1.997305 | 2.215190  | 0.401057  |
| O  | 1.016206  | -1.887291 | -0.764648 |
| C  | -4.066002 | 0.435078  | 0.016491  |
| N  | -4.341768 | 1.727264  | 0.388360  |
| C  | -3.294969 | 2.520899  | 0.521412  |
| C  | -2.730954 | -0.040083 | -0.153305 |
| C  | -2.489686 | -1.358844 | -0.583426 |
| C  | -5.135097 | -0.460886 | -0.243282 |
| C  | -4.883384 | -1.758050 | -0.660792 |
| C  | -3.558527 | -2.209986 | -0.839490 |
| H  | -6.151671 | -0.083308 | -0.109025 |
| H  | -5.718650 | -2.436741 | -0.860524 |
| H  | -3.369303 | -3.232364 | -1.177689 |
| H  | -1.463886 | -1.708722 | -0.717107 |
| H  | -3.507474 | 3.576910  | 0.745511  |

---

**Quinazoline (C5)**

27

|    |           |           |           |
|----|-----------|-----------|-----------|
| Mo | 1.343962  | -0.383074 | 0.034142  |
| S  | 3.538950  | -0.424981 | 1.025905  |
| C  | 4.582993  | 0.345693  | -0.180616 |
| H  | 5.661935  | 0.279191  | 0.004673  |
| C  | 4.101167  | 1.031598  | -1.233794 |
| H  | 4.765288  | 1.531745  | -1.947938 |
| S  | 2.362711  | 1.177976  | -1.542106 |
| S  | 0.252345  | -0.239523 | 2.036246  |
| O  | -0.456152 | 0.673238  | -0.541689 |
| H  | -0.497216 | 1.193575  | -1.358629 |
| C  | -1.695127 | 0.896254  | 0.248802  |
| H  | -1.063936 | 0.373959  | 1.364084  |
| C  | -2.015436 | 2.261082  | 0.494067  |
| O  | 1.113822  | -1.904157 | -0.651402 |
| C  | -4.150749 | 0.463275  | 0.001124  |
| C  | -4.415186 | 1.804159  | 0.379111  |
| C  | -3.347420 | 2.672699  | 0.599927  |
| C  | -2.796006 | 0.007783  | -0.108054 |
| C  | -2.607560 | -1.322695 | -0.536231 |
| N  | -5.180002 | -0.385889 | -0.289670 |
| C  | -4.859497 | -1.604518 | -0.670374 |
| N  | -3.623527 | -2.130122 | -0.821769 |
| H  | -5.694089 | -2.283023 | -0.898677 |
| H  | -1.592890 | -1.723401 | -0.652153 |
| H  | -3.551698 | 3.715715  | 0.863071  |
| H  | -5.454923 | 2.126482  | 0.453063  |
| H  | -1.191375 | 2.952518  | 0.687241  |

**Quinazoline (C6)**

27

|    |           |           |           |
|----|-----------|-----------|-----------|
| Mo | 1.771957  | -0.417512 | -0.156688 |
| S  | 3.828201  | -0.296355 | 1.098127  |
| C  | 4.657759  | 1.134690  | 0.463302  |
| H  | 5.693877  | 1.275988  | 0.794218  |
| C  | 4.052657  | 2.041244  | -0.326438 |
| H  | 4.572997  | 2.939954  | -0.677239 |
| S  | 2.373085  | 1.849763  | -0.852835 |
| S  | 0.591799  | -1.390837 | 1.539826  |
| O  | -0.206867 | 0.326227  | -0.549772 |
| H  | -0.367886 | 1.147020  | -1.039638 |
| C  | -1.510587 | -0.205246 | -0.027484 |
| H  | -0.812501 | -0.898616 | 0.940281  |
| C  | -2.376151 | 0.770898  | 0.525195  |
| O  | 2.042334  | -1.534267 | -1.386803 |
| C  | -3.449615 | -1.318550 | -1.064750 |
| C  | -4.341860 | -0.396905 | -0.424912 |
| C  | -3.770975 | 0.660617  | 0.365768  |
| C  | -2.097738 | -1.208471 | -0.901999 |
| C  | -4.723298 | 1.548807  | 0.946685  |
| N  | -5.679019 | -0.514000 | -0.585526 |
| N  | -6.025540 | 1.417462  | 0.784488  |
| C  | -6.441587 | 0.380452  | 0.018002  |
| H  | -4.369223 | 2.385658  | 1.565610  |
| H  | -7.527187 | 0.281095  | -0.110517 |
| H  | -3.888781 | -2.098582 | -1.691432 |
| H  | -1.951440 | 1.569463  | 1.140577  |
| H  | -1.403528 | -1.896506 | -1.393017 |

**Quinazoline (C7)**

27

|    |           |           |           |
|----|-----------|-----------|-----------|
| Mo | 1.756916  | -0.433385 | -0.214115 |
| S  | 3.785382  | -0.326260 | 1.085886  |
| C  | 4.612076  | 1.132129  | 0.512760  |
| H  | 5.634311  | 1.279648  | 0.881880  |
| C  | 4.020147  | 2.050730  | -0.272692 |
| H  | 4.538170  | 2.964909  | -0.584313 |
| S  | 2.367958  | 1.841120  | -0.874067 |
| S  | 0.565809  | -1.422268 | 1.463856  |
| O  | -0.216111 | 0.351641  | -0.603623 |
| H  | -0.315812 | 1.300648  | -0.779906 |
| C  | -1.505177 | -0.185663 | -0.080390 |
| H  | -0.825970 | -0.894705 | 0.889321  |
| C  | -2.378272 | 0.775542  | 0.491854  |
| O  | 2.032278  | -1.538964 | -1.453096 |
| C  | -3.425487 | -1.336001 | -1.083980 |
| C  | -4.319689 | -0.427261 | -0.428851 |
| C  | -3.771732 | 0.646278  | 0.360611  |
| C  | -2.075286 | -1.201814 | -0.952848 |
| N  | -4.616347 | 1.533459  | 0.972403  |
| C  | -5.720187 | -0.491440 | -0.508897 |
| C  | -5.908012 | 1.343816  | 0.807980  |
| N  | -6.528308 | 0.372485  | 0.096904  |
| H  | -3.844002 | -2.133925 | -1.706247 |
| H  | -1.979398 | 1.580683  | 1.113561  |
| H  | -1.373625 | -1.873815 | -1.454161 |
| H  | -6.190196 | -1.291912 | -1.099225 |
| H  | -6.575071 | 2.060435  | 1.308623  |

**Quinazoline (C8)**

27

|    |           |           |           |
|----|-----------|-----------|-----------|
| Mo | 1.389014  | -0.490600 | 0.046820  |
| S  | 3.545610  | -0.172137 | 1.080304  |
| C  | 4.522433  | 0.641930  | -0.152238 |
| H  | 5.592472  | 0.736998  | 0.069484  |
| C  | 3.996797  | 1.176250  | -1.270598 |
| H  | 4.615958  | 1.709045  | -2.001494 |
| S  | 2.269888  | 1.057374  | -1.638157 |
| S  | 0.257076  | -0.335147 | 2.025416  |
| O  | -0.467182 | 0.433889  | -0.595404 |
| H  | -0.464948 | 0.971913  | -1.402124 |
| C  | -1.661197 | 0.764748  | 0.204171  |
| H  | -1.075205 | 0.195702  | 1.315542  |
| C  | -1.854169 | 2.158763  | 0.441573  |
| O  | 1.390647  | -2.074359 | -0.513704 |
| C  | -4.147115 | 0.577105  | 0.031876  |
| C  | -4.283859 | 1.938498  | 0.409121  |
| C  | -3.133491 | 2.704250  | 0.585937  |
| C  | -2.852500 | -0.017329 | -0.128592 |
| N  | -2.714900 | -1.291902 | -0.539152 |
| C  | -5.236561 | -0.287684 | -0.261492 |
| N  | -5.088880 | -1.537654 | -0.656949 |
| C  | -3.814709 | -1.978992 | -0.783987 |
| H  | -3.225070 | 3.764718  | 0.841580  |
| H  | -5.280974 | 2.373311  | 0.518013  |
| H  | -0.960784 | 2.767385  | 0.603317  |
| H  | -3.690220 | -3.014988 | -1.122619 |
| H  | -6.263295 | 0.094257  | -0.161830 |



*B3LYP transition state coordinates for a concerted reaction mechanism for phthalazine.*

Phthalazine (C4 - Primary SOM)

27

|    |           |           |           |
|----|-----------|-----------|-----------|
| Mo | 1.322472  | -0.418817 | 0.067171  |
| S  | 3.477544  | -0.499787 | 1.139049  |
| C  | 4.581632  | 0.251478  | -0.020346 |
| H  | 5.649205  | 0.173104  | 0.217090  |
| C  | 4.155675  | 0.943777  | -1.092218 |
| H  | 4.855552  | 1.437312  | -1.775643 |
| S  | 2.440079  | 1.097023  | -1.491525 |
| S  | 0.229690  | -0.222226 | 2.034167  |
| O  | -0.408399 | 0.732425  | -0.600888 |
| H  | -0.187463 | 1.653797  | -0.846711 |
| C  | -1.655165 | 0.889385  | 0.175617  |
| H  | -1.104083 | 0.490182  | 1.307058  |
| N  | -1.959220 | 2.222213  | 0.220400  |
| O  | 1.058944  | -1.945866 | -0.602226 |
| C  | -4.040127 | 0.379638  | 0.009631  |
| C  | -4.212902 | 1.769978  | 0.311573  |
| N  | -3.213155 | 2.630634  | 0.348687  |
| C  | -2.709000 | -0.091326 | -0.143717 |
| C  | -2.470710 | -1.428398 | -0.513836 |
| C  | -5.116099 | -0.515789 | -0.205989 |
| C  | -4.868780 | -1.833270 | -0.560352 |
| C  | -3.544408 | -2.289619 | -0.721125 |
| H  | -5.218586 | 2.185282  | 0.444539  |
| H  | -6.141929 | -0.150279 | -0.096419 |
| H  | -5.704030 | -2.521709 | -0.721689 |
| H  | -3.356779 | -3.328192 | -1.007035 |
| H  | -1.446774 | -1.788220 | -0.637222 |

-----  
Phthalazine (C5)

27

|    |           |           |           |
|----|-----------|-----------|-----------|
| Mo | 1.368096  | -0.470465 | -0.012011 |
| S  | 3.550562  | -0.333410 | 0.992134  |
| C  | 4.545192  | 0.522583  | -0.196373 |
| H  | 5.621834  | 0.547730  | 0.009963  |
| C  | 4.024851  | 1.163366  | -1.258426 |
| H  | 4.651683  | 1.720425  | -1.963587 |
| S  | 2.288100  | 1.146650  | -1.595840 |
| S  | 0.278944  | -0.408012 | 1.999139  |
| O  | -0.481392 | 0.526273  | -0.563945 |
| H  | -0.457354 | 1.156900  | -1.301253 |
| C  | -1.685590 | 0.789266  | 0.264873  |
| H  | -1.046180 | 0.179908  | 1.354681  |
| C  | -1.910277 | 2.159406  | 0.589115  |
| O  | 1.240638  | -2.003910 | -0.694706 |
| C  | -4.157888 | 0.550622  | 0.061016  |
| C  | -4.333816 | 1.882095  | 0.509883  |
| C  | -3.203648 | 2.663133  | 0.749768  |
| C  | -2.855648 | 0.002143  | -0.104230 |
| C  | -2.786723 | -1.321620 | -0.606251 |
| C  | -5.228633 | -0.323710 | -0.294572 |
| N  | -5.080322 | -1.545390 | -0.753081 |
| N  | -3.840112 | -2.056754 | -0.921817 |
| H  | -5.341255 | 2.287747  | 0.631094  |
| H  | -6.264708 | 0.026271  | -0.192507 |
| H  | -1.811936 | -1.795749 | -0.765916 |
| H  | -1.038472 | 2.785455  | 0.798251  |
| H  | -3.323908 | 3.703581  | 1.068142  |

-----

Phthalazine (C6)

27

|    |           |           |           |
|----|-----------|-----------|-----------|
| Mo | 1.812397  | -0.458167 | -0.108917 |
| S  | 3.812305  | -0.266601 | 1.220299  |
| C  | 4.653012  | 1.151744  | 0.576659  |
| H  | 5.667128  | 1.319657  | 0.958429  |
| C  | 4.078651  | 2.019901  | -0.275139 |
| H  | 4.601607  | 2.913388  | -0.633879 |
| S  | 2.439237  | 1.771544  | -0.892461 |
| S  | 0.589976  | -1.341934 | 1.607478  |
| O  | -0.156218 | 0.280941  | -0.592233 |
| H  | -0.254952 | 1.193755  | -0.905864 |
| C  | -1.466849 | -0.205686 | -0.060643 |
| H  | -0.789083 | -0.862405 | 0.968980  |
| C  | -2.335458 | 0.804933  | 0.432824  |
| O  | 2.117809  | -1.635875 | -1.272786 |
| C  | -3.405680 | -1.373919 | -1.027245 |
| C  | -4.289466 | -0.411296 | -0.445781 |
| C  | -3.726799 | 0.684111  | 0.277642  |
| C  | -2.052333 | -1.256686 | -0.878201 |
| C  | -4.688149 | 1.606787  | 0.802308  |
| N  | -5.989836 | 1.495622  | 0.662825  |
| C  | -5.698304 | -0.444013 | -0.544882 |
| N  | -6.516784 | 0.453342  | -0.022587 |
| H  | -6.183137 | -1.265446 | -1.089486 |
| H  | -4.342288 | 2.479891  | 1.370997  |
| H  | -3.824913 | -2.200519 | -1.609572 |
| H  | -1.916713 | 1.636141  | 1.008674  |
| H  | -1.365158 | -1.977337 | -1.330312 |

-----  
-----

*B3LYP-D3 transition state coordinates for a concerted reaction mechanism for phthalazine.*

Phthalazine (C4 - Primary SOM)

27

|    |           |           |           |
|----|-----------|-----------|-----------|
| Mo | 1.296672  | -0.404408 | 0.028623  |
| S  | 3.458990  | -0.561973 | 1.083237  |
| C  | 4.563408  | 0.238347  | -0.044883 |
| H  | 5.631960  | 0.142987  | 0.182819  |
| C  | 4.138541  | 0.983030  | -1.082382 |
| H  | 4.841524  | 1.502927  | -1.743131 |
| S  | 2.421914  | 1.166940  | -1.470224 |
| S  | 0.205377  | -0.283275 | 1.999849  |
| O  | -0.424618 | 0.788271  | -0.593621 |
| H  | -0.207424 | 1.720679  | -0.796345 |
| C  | -1.667732 | 0.906702  | 0.191798  |
| H  | -1.128794 | 0.474545  | 1.302003  |
| N  | -1.985213 | 2.235102  | 0.285389  |
| O  | 1.011031  | -1.897163 | -0.705104 |
| C  | -4.043576 | 0.370288  | 0.030035  |
| C  | -4.230968 | 1.745270  | 0.390705  |
| N  | -3.242764 | 2.619318  | 0.446168  |
| C  | -2.709033 | -0.073479 | -0.161652 |
| C  | -2.451628 | -1.387761 | -0.590684 |
| C  | -5.108191 | -0.532272 | -0.208221 |
| C  | -4.843815 | -1.829692 | -0.621603 |
| C  | -3.514560 | -2.257064 | -0.819979 |
| H  | -6.137978 | -0.188573 | -0.069263 |
| H  | -5.669937 | -2.524692 | -0.800819 |
| H  | -1.423724 | -1.723279 | -0.741484 |
| H  | -5.240535 | 2.139158  | 0.554978  |
| H  | -3.314007 | -3.279309 | -1.152100 |

-----  
Phthalazine (C5)

27

|    |           |           |           |
|----|-----------|-----------|-----------|
| Mo | 1.796246  | -0.434948 | -0.088344 |
| S  | 3.825667  | -0.289358 | 1.206664  |
| C  | 4.682372  | 1.111173  | 0.541177  |
| H  | 5.709955  | 1.257000  | 0.895643  |
| C  | 4.106966  | 1.992968  | -0.296964 |
| H  | 4.644587  | 2.873024  | -0.667866 |
| S  | 2.445736  | 1.787962  | -0.875059 |
| S  | 0.577067  | -1.308733 | 1.630981  |
| O  | -0.165594 | 0.322363  | -0.564018 |
| H  | -0.277058 | 1.234592  | -0.873814 |
| C  | -1.471854 | -0.180302 | -0.031736 |
| H  | -0.805427 | -0.821471 | 0.994939  |
| C  | -2.355624 | 0.820019  | 0.454369  |
| O  | 2.064682  | -1.610574 | -1.261666 |
| C  | -3.382596 | -1.371310 | -1.023630 |
| C  | -4.282788 | -0.416596 | -0.453105 |
| C  | -3.742410 | 0.682977  | 0.281520  |
| C  | -2.033411 | -1.238855 | -0.856292 |
| C  | -4.721001 | 1.593050  | 0.796316  |
| N  | -6.019819 | 1.468257  | 0.639296  |
| C  | -5.689559 | -0.463700 | -0.571665 |
| N  | -6.525847 | 0.422926  | -0.057807 |
| H  | -6.156671 | -1.288291 | -1.126836 |
| H  | -4.391092 | 2.466504  | 1.373863  |
| H  | -3.787235 | -2.201049 | -1.611623 |
| H  | -1.949635 | 1.652300  | 1.037128  |
| H  | -1.325661 | -1.948049 | -1.294344 |

-----

Phthalazine (C6)

27

|    |           |           |           |
|----|-----------|-----------|-----------|
| Mo | 1.340202  | -0.410533 | -0.003682 |
| S  | 3.548251  | -0.431564 | 0.958556  |
| C  | 4.563209  | 0.386916  | -0.241685 |
| H  | 5.645348  | 0.336886  | -0.070455 |
| C  | 4.056060  | 1.087614  | -1.272851 |
| H  | 4.700803  | 1.617916  | -1.982936 |
| S  | 2.311584  | 1.204701  | -1.555746 |
| S  | 0.268584  | -0.340830 | 2.014443  |
| O  | -0.476377 | 0.652132  | -0.520452 |
| H  | -0.525151 | 1.194549  | -1.322957 |
| C  | -1.695049 | 0.867410  | 0.298593  |
| H  | -1.056207 | 0.272339  | 1.379091  |
| C  | -1.973812 | 2.227533  | 0.622031  |
| O  | 1.127833  | -1.918075 | -0.721699 |
| C  | -4.150524 | 0.533013  | 0.058771  |
| C  | -4.384420 | 1.853483  | 0.512498  |
| C  | -3.288090 | 2.677841  | 0.769212  |
| C  | -2.826340 | 0.037559  | -0.091133 |
| C  | -2.691203 | -1.280976 | -0.592086 |
| C  | -5.178834 | -0.382901 | -0.317376 |
| N  | -4.972773 | -1.596771 | -0.775737 |
| N  | -3.709808 | -2.058357 | -0.923492 |
| H  | -5.408080 | 2.218449  | 0.623985  |
| H  | -6.229621 | -0.074552 | -0.232386 |
| H  | -1.693763 | -1.712194 | -0.735323 |
| H  | -1.125009 | 2.881669  | 0.837148  |
| H  | -3.454780 | 3.711282  | 1.089209  |

-----  
-----

*B3LYP transition state coordinates for a concerted reaction mechanism for quinoline.*

**Quinoline (C2 - Primary SOM)**

28

|    |           |           |           |
|----|-----------|-----------|-----------|
| Mo | 1.706406  | -0.440282 | -0.155144 |
| S  | 3.762010  | -0.322424 | 1.108013  |
| C  | 4.571724  | 1.136246  | 0.521356  |
| H  | 5.600597  | 1.284911  | 0.870557  |
| C  | 3.958198  | 2.055102  | -0.246203 |
| H  | 4.464971  | 2.973183  | -0.564613 |
| S  | 2.296818  | 1.845600  | -0.812003 |
| S  | 0.592133  | -1.423180 | 1.548887  |
| O  | -0.262677 | 0.346849  | -0.533661 |
| H  | -0.362352 | 1.301236  | -0.356211 |
| C  | -1.535509 | -0.255187 | 0.007999  |
| H  | -0.880723 | -0.883759 | 0.978633  |
| N  | -2.348729 | 0.713650  | 0.466328  |
| O  | 1.959636  | -1.551884 | -1.396053 |
| C  | -3.394070 | -1.442877 | -1.016870 |
| C  | -4.290254 | -0.491838 | -0.414168 |
| C  | -3.686522 | 0.594861  | 0.312386  |
| C  | -2.050370 | -1.321471 | -0.856034 |
| C  | -4.550936 | 1.580537  | 0.872793  |
| C  | -5.925365 | 1.484224  | 0.738725  |
| C  | -5.693598 | -0.558792 | -0.537084 |
| C  | -6.511287 | 0.409293  | 0.032549  |
| H  | -6.132402 | -1.392041 | -1.096795 |
| H  | -4.084607 | 2.404853  | 1.417734  |
| H  | -3.810777 | -2.257958 | -1.618280 |
| H  | -1.338493 | -2.024054 | -1.295602 |
| H  | -7.598315 | 0.343826  | -0.066497 |
| H  | -6.567209 | 2.249303  | 1.187109  |

---

**Quinoline (C3)**

28

|    |           |           |           |
|----|-----------|-----------|-----------|
| Mo | 1.799930  | -0.521845 | -0.166161 |
| S  | 3.700346  | -0.078906 | 1.246698  |
| C  | 4.437328  | 1.387590  | 0.584505  |
| H  | 5.407037  | 1.669239  | 1.012096  |
| C  | 3.831407  | 2.159446  | -0.335615 |
| H  | 4.286253  | 3.085178  | -0.705407 |
| S  | 2.262010  | 1.725806  | -1.025547 |
| S  | 0.590990  | -1.471045 | 1.527072  |
| O  | -0.203402 | 0.064779  | -0.715036 |
| H  | -0.319072 | 0.945743  | -1.106048 |
| C  | -1.514141 | -0.361955 | -0.100217 |
| H  | -0.807627 | -1.075930 | 0.847530  |
| C  | -2.285395 | 0.678086  | 0.468057  |
| O  | 2.288871  | -1.697555 | -1.267776 |
| N  | -3.544956 | -1.351680 | -1.045195 |
| C  | -4.302347 | -0.396446 | -0.410497 |
| C  | -3.692163 | 0.655728  | 0.358913  |
| C  | -2.249744 | -1.315776 | -0.924087 |
| C  | -4.545231 | 1.627519  | 0.963392  |
| C  | -5.917674 | 1.555931  | 0.819121  |
| C  | -5.709615 | -0.439437 | -0.541230 |
| C  | -6.512013 | 0.516378  | 0.061815  |
| H  | -6.131697 | -1.253611 | -1.135887 |
| H  | -4.091142 | 2.431238  | 1.551275  |
| H  | -1.660221 | -2.077454 | -1.453000 |
| H  | -7.599499 | 0.471898  | -0.044738 |
| H  | -6.553095 | 2.309214  | 1.295190  |
| H  | -1.788433 | 1.459907  | 1.050899  |

---



**Quinoline (C4)**

28

|    |           |           |           |
|----|-----------|-----------|-----------|
| Mo | 1.361969  | -0.436476 | 0.008357  |
| S  | 3.544788  | -0.360207 | 1.021501  |
| C  | 4.574373  | 0.427169  | -0.183925 |
| H  | 5.651066  | 0.414011  | 0.023480  |
| C  | 4.080693  | 1.066730  | -1.259589 |
| H  | 4.731163  | 1.580043  | -1.976477 |
| S  | 2.345067  | 1.117852  | -1.600157 |
| S  | 0.265962  | -0.305233 | 2.009930  |
| O  | -0.452127 | 0.585701  | -0.572113 |
| H  | -0.417421 | 1.235531  | -1.291590 |
| C  | -1.694383 | 0.810479  | 0.221910  |
| H  | -1.052756 | 0.279961  | 1.343420  |
| C  | -2.026116 | 2.168342  | 0.462732  |
| O  | 1.187394  | -1.979651 | -0.645716 |
| C  | -4.138120 | 0.460540  | -0.025614 |
| N  | -4.411717 | 1.755299  | 0.311585  |
| C  | -3.372999 | 2.549392  | 0.530366  |
| C  | -2.807926 | -0.068731 | -0.123727 |
| C  | -2.612771 | -1.413501 | -0.517103 |
| C  | -5.227138 | -0.406807 | -0.324266 |
| C  | -5.013110 | -1.718322 | -0.703341 |
| C  | -3.697674 | -2.226955 | -0.804889 |
| H  | -5.864878 | -2.367359 | -0.929901 |
| H  | -3.533733 | -3.264131 | -1.110227 |
| H  | -1.595369 | -1.804581 | -0.594094 |
| H  | -3.605795 | 3.593942  | 0.783618  |
| H  | -1.230659 | 2.887603  | 0.675345  |
| H  | -6.231940 | 0.015540  | -0.245631 |

---

**Quinoline (C5)**

28

|    |           |           |           |
|----|-----------|-----------|-----------|
| Mo | 1.387803  | -0.412637 | 0.072368  |
| S  | 3.580734  | -0.440799 | 1.065926  |
| C  | 4.626726  | 0.342094  | -0.128829 |
| H  | 5.704307  | 0.284396  | 0.066306  |
| C  | 4.146144  | 1.027032  | -1.182425 |
| H  | 4.808643  | 1.537891  | -1.890296 |
| S  | 2.410442  | 1.154946  | -1.500672 |
| S  | 0.297276  | -0.301215 | 2.074357  |
| O  | -0.399143 | 0.662496  | -0.485853 |
| H  | -0.419367 | 1.227659  | -1.273315 |
| C  | -1.659890 | 0.867208  | 0.306039  |
| H  | -1.038761 | 0.330560  | 1.388728  |
| C  | -1.981189 | 2.231160  | 0.555251  |
| O  | 1.168632  | -1.933299 | -0.624235 |
| C  | -4.112438 | 0.454315  | -0.038631 |
| C  | -4.373274 | 1.801120  | 0.338604  |
| C  | -3.313501 | 2.657734  | 0.611831  |
| C  | -2.755937 | -0.016304 | -0.099058 |
| C  | -2.532173 | -1.344566 | -0.518976 |
| N  | -5.164686 | -0.351373 | -0.365238 |
| C  | -4.914313 | -1.587231 | -0.748872 |
| C  | -3.617869 | -2.139918 | -0.851182 |
| H  | -5.786405 | -2.207226 | -1.003209 |
| H  | -3.482105 | -3.172440 | -1.182475 |
| H  | -1.511700 | -1.731440 | -0.583237 |
| H  | -3.518293 | 3.700174  | 0.877245  |
| H  | -1.163321 | 2.917104  | 0.791977  |
| H  | -5.413241 | 2.130082  | 0.373206  |

---

**Quinoline (C6)**

28

|    |           |           |           |
|----|-----------|-----------|-----------|
| Mo | 1.807188  | -0.497754 | -0.186788 |
| S  | 3.778106  | -0.222532 | 1.176938  |
| C  | 4.552367  | 1.250658  | 0.574372  |
| H  | 5.549923  | 1.465196  | 0.976284  |
| C  | 3.945437  | 2.102780  | -0.271321 |
| H  | 4.425514  | 3.030392  | -0.602964 |
| S  | 2.329362  | 1.782560  | -0.914664 |
| S  | 0.618818  | -1.488452 | 1.492822  |
| O  | -0.182099 | 0.172218  | -0.652428 |
| H  | -0.309307 | 1.067057  | -1.004499 |
| C  | -1.494602 | -0.311431 | -0.074693 |
| H  | -0.791683 | -1.010081 | 0.872759  |
| C  | -2.299269 | 0.707043  | 0.495752  |
| O  | 2.195863  | -1.627048 | -1.374409 |
| C  | -3.518179 | -1.324167 | -1.038008 |
| C  | -4.350827 | -0.347890 | -0.396134 |
| C  | -3.705439 | 0.685740  | 0.377124  |
| C  | -2.158397 | -1.290832 | -0.919801 |
| C  | -4.563537 | 1.649444  | 0.982250  |
| C  | -5.930192 | 1.549125  | 0.813787  |
| N  | -5.691794 | -0.424310 | -0.550633 |
| C  | -6.450838 | 0.487986  | 0.033484  |
| H  | -4.017889 | -2.088002 | -1.639194 |
| H  | -1.526870 | -2.028595 | -1.422696 |
| H  | -7.535988 | 0.397042  | -0.109498 |
| H  | -6.609948 | 2.273353  | 1.272154  |
| H  | -1.818473 | 1.484715  | 1.097726  |
| H  | -4.126301 | 2.456028  | 1.579134  |

**Quinoline (C7)**

28

|    |           |           |           |
|----|-----------|-----------|-----------|
| Mo | 1.786845  | -0.449288 | -0.123299 |
| S  | 3.810262  | -0.258736 | 1.176056  |
| C  | 4.619374  | 1.185984  | 0.551043  |
| H  | 5.638651  | 1.359457  | 0.916641  |
| C  | 4.017638  | 2.063499  | -0.272223 |
| H  | 4.522325  | 2.972919  | -0.617599 |
| S  | 2.367269  | 1.814820  | -0.857379 |
| S  | 0.614104  | -1.406503 | 1.583339  |
| O  | -0.190549 | 0.271817  | -0.548866 |
| H  | -0.323793 | 1.183859  | -0.850824 |
| C  | -1.496704 | -0.261804 | -0.007001 |
| H  | -0.804532 | -0.915892 | 0.970841  |
| C  | -2.376949 | 0.724740  | 0.505888  |
| O  | 2.095942  | -1.588871 | -1.324329 |
| C  | -3.418261 | -1.408054 | -1.020902 |
| C  | -4.324580 | -0.468455 | -0.427695 |
| C  | -3.774648 | 0.621440  | 0.344201  |
| C  | -2.068483 | -1.293992 | -0.858835 |
| N  | -4.584105 | 1.566796  | 0.914071  |
| C  | -5.887506 | 1.454733  | 0.758850  |
| C  | -5.723411 | -0.543026 | -0.563080 |
| C  | -6.524697 | 0.422161  | 0.030298  |
| H  | -6.162750 | -1.363356 | -1.140962 |
| H  | -3.829335 | -2.221858 | -1.627656 |
| H  | -1.376365 | -2.002197 | -1.322670 |
| H  | -7.614123 | 0.393987  | -0.050913 |
| H  | -6.503873 | 2.231827  | 1.234450  |
| H  | -1.989648 | 1.546428  | 1.113641  |

Quinoline (C8)

28

|    |           |           |           |
|----|-----------|-----------|-----------|
| Mo | 1.413124  | -0.555794 | 0.098787  |
| S  | 3.550003  | -0.202580 | 1.158347  |
| C  | 4.533683  | 0.628515  | -0.055536 |
| H  | 5.596767  | 0.744574  | 0.188092  |
| C  | 4.018927  | 1.150561  | -1.183884 |
| H  | 4.639091  | 1.695615  | -1.904609 |
| S  | 2.304256  | 0.990993  | -1.584500 |
| S  | 0.267065  | -0.420267 | 2.073809  |
| O  | -0.435028 | 0.381922  | -0.546296 |
| H  | -0.377428 | 0.994246  | -1.296500 |
| C  | -1.647031 | 0.702157  | 0.242460  |
| H  | -1.063322 | 0.114872  | 1.357643  |
| C  | -1.835805 | 2.091579  | 0.498794  |
| O  | 1.438412  | -2.140381 | -0.462300 |
| C  | -4.137558 | 0.525043  | 0.006001  |
| C  | -4.262438 | 1.887766  | 0.391115  |
| C  | -3.115172 | 2.643285  | 0.612529  |
| C  | -2.836855 | -0.078798 | -0.119845 |
| N  | -2.665282 | -1.350841 | -0.525292 |
| C  | -5.250269 | -0.298757 | -0.315994 |
| C  | -5.049970 | -1.601035 | -0.728765 |
| C  | -3.723584 | -2.083154 | -0.821706 |
| H  | -5.890609 | -2.252316 | -0.983953 |
| H  | -3.534320 | -3.113321 | -1.150398 |
| H  | -3.209270 | 3.700967  | 0.879489  |
| H  | -0.947384 | 2.697776  | 0.695734  |
| H  | -5.257395 | 2.333666  | 0.474669  |
| H  | -6.259795 | 0.118374  | -0.238805 |

-----  
-----

*B3LYP-D3 transition state coordinates for a concerted reaction mechanism for quinoline.*

**Quinoline (C2 - Primary SOM)**

28

|    |           |           |           |
|----|-----------|-----------|-----------|
| Mo | 1.696958  | -0.424504 | -0.207922 |
| S  | 3.791051  | -0.375017 | 1.003127  |
| C  | 4.601264  | 1.094907  | 0.442420  |
| H  | 5.640781  | 1.222612  | 0.768363  |
| C  | 3.979055  | 2.045515  | -0.279347 |
| H  | 4.490429  | 2.967465  | -0.579491 |
| S  | 2.300378  | 1.873927  | -0.810154 |
| S  | 0.608161  | -1.442154 | 1.489275  |
| O  | -0.266752 | 0.397411  | -0.526207 |
| H  | -0.363341 | 1.344069  | -0.310987 |
| C  | -1.532383 | -0.222240 | 0.015486  |
| H  | -0.879776 | -0.868361 | 0.962294  |
| N  | -2.345903 | 0.733664  | 0.501037  |
| O  | 1.902692  | -1.498620 | -1.489531 |
| C  | -3.385288 | -1.393456 | -1.035390 |
| C  | -4.283019 | -0.459458 | -0.407682 |
| C  | -3.682788 | 0.612193  | 0.344919  |
| C  | -2.042652 | -1.270674 | -0.873083 |
| C  | -4.551004 | 1.579603  | 0.930455  |
| C  | -5.925415 | 1.480558  | 0.795431  |
| C  | -5.685802 | -0.529396 | -0.530847 |
| C  | -6.507512 | 0.420934  | 0.063221  |
| H  | -6.121042 | -1.350700 | -1.110604 |
| H  | -4.087803 | 2.392256  | 1.495277  |
| H  | -3.801465 | -2.195170 | -1.654790 |
| H  | -1.322082 | -1.954673 | -1.327257 |
| H  | -7.594339 | 0.353251  | -0.036574 |
| H  | -6.569946 | 2.231483  | 1.263501  |

---

**Quinoline (C3)**

28

|    |           |           |           |
|----|-----------|-----------|-----------|
| Mo | 1.782842  | -0.494883 | -0.186358 |
| S  | 3.680167  | -0.009718 | 1.224865  |
| C  | 4.391677  | 1.463359  | 0.547221  |
| H  | 5.356085  | 1.767754  | 0.971795  |
| C  | 3.775431  | 2.214295  | -0.384407 |
| H  | 4.217842  | 3.142907  | -0.762696 |
| S  | 2.211278  | 1.750273  | -1.069989 |
| S  | 0.577625  | -1.435342 | 1.511642  |
| O  | -0.223951 | 0.035107  | -0.773272 |
| H  | -0.362225 | 0.883205  | -1.223993 |
| C  | -1.527859 | -0.371388 | -0.129798 |
| H  | -0.825159 | -1.063737 | 0.821270  |
| C  | -2.279651 | 0.688923  | 0.427170  |
| O  | 2.294066  | -1.676846 | -1.269584 |
| N  | -3.577325 | -1.366603 | -1.023801 |
| C  | -4.317029 | -0.400541 | -0.384082 |
| C  | -3.687192 | 0.665200  | 0.352605  |
| C  | -2.279871 | -1.331947 | -0.928916 |
| C  | -4.523462 | 1.649026  | 0.960741  |
| C  | -5.899118 | 1.575930  | 0.853222  |
| C  | -5.727236 | -0.443832 | -0.477554 |
| C  | -6.513088 | 0.522851  | 0.130398  |
| H  | -6.165877 | -1.267264 | -1.046923 |
| H  | -4.052583 | 2.461938  | 1.522122  |
| H  | -1.697750 | -2.099303 | -1.457246 |
| H  | -7.602968 | 0.477226  | 0.053168  |
| H  | -6.522236 | 2.337162  | 1.332846  |
| H  | -1.762217 | 1.475605  | 0.984308  |

---

**Quinoline (C4)**

28

|    |           |           |           |
|----|-----------|-----------|-----------|
| Mo | 1.329858  | -0.398270 | 0.020622  |
| S  | 3.522425  | -0.447190 | 1.018589  |
| C  | 4.573646  | 0.323533  | -0.181957 |
| H  | 5.651586  | 0.256361  | 0.009286  |
| C  | 4.098426  | 1.010763  | -1.237220 |
| H  | 4.766840  | 1.511000  | -1.947385 |
| S  | 2.362088  | 1.156311  | -1.555982 |
| S  | 0.234587  | -0.264831 | 2.021246  |
| O  | -0.458934 | 0.671354  | -0.542408 |
| H  | -0.501111 | 1.201366  | -1.353086 |
| C  | -1.708656 | 0.877417  | 0.240478  |
| H  | -1.072618 | 0.355549  | 1.360143  |
| C  | -2.064148 | 2.230876  | 0.472778  |
| O  | 1.095997  | -1.918733 | -0.667364 |
| C  | -4.141149 | 0.478566  | -0.016691 |
| N  | -4.440971 | 1.767763  | 0.320080  |
| C  | -3.418410 | 2.583758  | 0.539433  |
| C  | -2.800531 | -0.023363 | -0.109639 |
| C  | -2.570109 | -1.363578 | -0.496274 |
| C  | -5.209236 | -0.413977 | -0.316488 |
| C  | -4.962740 | -1.721438 | -0.691639 |
| C  | -3.635671 | -2.201713 | -0.785947 |
| H  | -5.798822 | -2.389669 | -0.920921 |
| H  | -3.447885 | -3.236480 | -1.085498 |
| H  | -1.542907 | -1.729751 | -0.566732 |
| H  | -3.673779 | 3.623793  | 0.789331  |
| H  | -1.278063 | 2.961736  | 0.677530  |
| H  | -6.224349 | -0.016052 | -0.242399 |

---

**Quinoline (C5)**

28

|    |           |           |           |
|----|-----------|-----------|-----------|
| Mo | 1.323978  | -0.390513 | 0.020831  |
| S  | 3.530332  | -0.483192 | 0.987912  |
| C  | 4.576224  | 0.284277  | -0.218935 |
| H  | 5.655639  | 0.200631  | -0.042833 |
| C  | 4.096451  | 0.989495  | -1.260491 |
| H  | 4.762767  | 1.487945  | -1.974036 |
| S  | 2.358194  | 1.167041  | -1.551370 |
| S  | 0.249944  | -0.240309 | 2.028585  |
| O  | -0.459073 | 0.687546  | -0.539827 |
| H  | -0.531459 | 1.161932  | -1.381793 |
| C  | -1.717162 | 0.888192  | 0.253034  |
| H  | -1.087312 | 0.394028  | 1.345790  |
| C  | -2.067684 | 2.251138  | 0.460867  |
| O  | 1.062991  | -1.906796 | -0.671639 |
| C  | -4.157806 | 0.397999  | -0.048861 |
| C  | -4.449625 | 1.749755  | 0.286048  |
| C  | -3.410218 | 2.643001  | 0.522196  |
| C  | -2.790199 | -0.036333 | -0.111499 |
| C  | -2.528160 | -1.372048 | -0.480294 |
| N  | -5.190259 | -0.448977 | -0.332110 |
| C  | -4.905957 | -1.691455 | -0.669386 |
| C  | -3.594386 | -2.210849 | -0.765599 |
| H  | -5.761714 | -2.346441 | -0.888861 |
| H  | -3.432555 | -3.251733 | -1.056496 |
| H  | -1.496759 | -1.728953 | -0.542125 |
| H  | -3.641682 | 3.687408  | 0.756023  |
| H  | -1.260786 | 2.960665  | 0.661144  |
| H  | -5.497335 | 2.053129  | 0.322453  |

---

**Quinoline (C6)**

28

|    |           |           |           |
|----|-----------|-----------|-----------|
| Mo | 1.756101  | -0.437129 | -0.221664 |
| S  | 3.801880  | -0.290470 | 1.053246  |
| C  | 4.592847  | 1.183886  | 0.470846  |
| H  | 5.618821  | 1.349390  | 0.821891  |
| C  | 3.970067  | 2.093081  | -0.302025 |
| H  | 4.466218  | 3.017673  | -0.619218 |
| S  | 2.306607  | 1.861698  | -0.862516 |
| S  | 0.595664  | -1.468237 | 1.452323  |
| O  | -0.232385 | 0.269578  | -0.612375 |
| H  | -0.398666 | 1.122941  | -1.040709 |
| C  | -1.533703 | -0.264643 | -0.066187 |
| H  | -0.825861 | -0.976342 | 0.865339  |
| C  | -2.370524 | 0.712679  | 0.526890  |
| O  | 2.066378  | -1.520712 | -1.472295 |
| C  | -3.513321 | -1.310792 | -1.079100 |
| C  | -4.380743 | -0.384982 | -0.407988 |
| C  | -3.773829 | 0.644891  | 0.403000  |
| C  | -2.156312 | -1.235757 | -0.949851 |
| C  | -4.665518 | 1.555474  | 1.040514  |
| C  | -6.027347 | 1.415610  | 0.860726  |
| N  | -5.717789 | -0.501234 | -0.570800 |
| C  | -6.508747 | 0.365836  | 0.039775  |
| H  | -3.984238 | -2.068668 | -1.710285 |
| H  | -1.490001 | -1.931116 | -1.467961 |
| H  | -7.589680 | 0.243658  | -0.111025 |
| H  | -6.733347 | 2.098802  | 1.341724  |
| H  | -1.912798 | 1.485178  | 1.152126  |
| H  | -4.256857 | 2.354021  | 1.667621  |

---

**Quinoline (C7)**

28

|    |           |           |           |
|----|-----------|-----------|-----------|
| Mo | 1.746586  | -0.437292 | -0.208881 |
| S  | 3.797026  | -0.293272 | 1.060527  |
| C  | 4.594054  | 1.174450  | 0.470714  |
| H  | 5.618637  | 1.339463  | 0.825970  |
| C  | 3.977680  | 2.080410  | -0.311019 |
| H  | 4.477991  | 3.001393  | -0.631997 |
| S  | 2.320114  | 1.845674  | -0.886064 |
| S  | 0.595062  | -1.440602 | 1.483056  |
| O  | -0.231916 | 0.301815  | -0.591323 |
| H  | -0.370915 | 1.226041  | -0.850213 |
| C  | -1.528104 | -0.246795 | -0.041149 |
| H  | -0.830383 | -0.927075 | 0.908620  |
| C  | -2.398561 | 0.722765  | 0.516215  |
| O  | 2.030869  | -1.541033 | -1.448074 |
| C  | -3.458559 | -1.360529 | -1.068131 |
| C  | -4.356324 | -0.438682 | -0.434788 |
| C  | -3.797279 | 0.628125  | 0.364143  |
| C  | -2.107311 | -1.255189 | -0.914192 |
| N  | -4.599632 | 1.553766  | 0.974954  |
| C  | -5.904680 | 1.448482  | 0.826793  |
| C  | -5.756053 | -0.505472 | -0.562088 |
| C  | -6.550399 | 0.440765  | 0.070602  |
| H  | -6.201724 | -1.305711 | -1.162742 |
| H  | -3.878857 | -2.153779 | -1.695455 |
| H  | -1.414739 | -1.945814 | -1.402806 |
| H  | -7.640464 | 0.418677  | -0.003876 |
| H  | -6.515874 | 2.208812  | 1.334933  |
| H  | -1.996924 | 1.524887  | 1.140092  |

---

Quinoline (C8)

28

|    |           |           |           |
|----|-----------|-----------|-----------|
| Mo | 1.364036  | -0.498454 | 0.031145  |
| S  | 3.526470  | -0.177048 | 1.056839  |
| C  | 4.499348  | 0.637712  | -0.178442 |
| H  | 5.569448  | 0.736847  | 0.041912  |
| C  | 3.971411  | 1.166298  | -1.298593 |
| H  | 4.588901  | 1.699228  | -2.030994 |
| S  | 2.244892  | 1.040810  | -1.665565 |
| S  | 0.246609  | -0.343955 | 2.018099  |
| O  | -0.486987 | 0.434103  | -0.597490 |
| H  | -0.472848 | 1.006688  | -1.379737 |
| C  | -1.684459 | 0.756908  | 0.210562  |
| H  | -1.097184 | 0.190894  | 1.310805  |
| C  | -1.874471 | 2.148919  | 0.452683  |
| O  | 1.362328  | -2.082952 | -0.528184 |
| C  | -4.174273 | 0.560389  | 0.014052  |
| C  | -4.301344 | 1.925352  | 0.390230  |
| C  | -3.155095 | 2.692352  | 0.582134  |
| C  | -2.871791 | -0.034473 | -0.128442 |
| N  | -2.692097 | -1.308139 | -0.523828 |
| C  | -5.285404 | -0.276392 | -0.278525 |
| C  | -5.078473 | -1.581332 | -0.680855 |
| C  | -3.749100 | -2.053089 | -0.793808 |
| H  | -5.917201 | -2.243770 | -0.913382 |
| H  | -3.556341 | -3.084614 | -1.115719 |
| H  | -3.252843 | 3.752006  | 0.839843  |
| H  | -0.982304 | 2.755999  | 0.626663  |
| H  | -5.297806 | 2.364939  | 0.487689  |
| H  | -6.297201 | 0.132358  | -0.187952 |

-----  
-----



*B3LYP transition state coordinates for a concerted reaction mechanism for 2-amino-9-methylpurine (Famciclovir).*

**Famciclovir (C6 - Primary SOM)**

29

|    |           |           |           |
|----|-----------|-----------|-----------|
| Mo | -1.686402 | 0.548674  | 0.091247  |
| S  | -3.777076 | 0.117812  | 1.223347  |
| C  | -4.751174 | -0.785663 | 0.056488  |
| H  | -5.797038 | -0.957028 | 0.339017  |
| C  | -4.246169 | -1.299209 | -1.079798 |
| H  | -4.858669 | -1.887693 | -1.772240 |
| S  | -2.562019 | -1.041639 | -1.554125 |
| S  | -0.520852 | 0.451899  | 2.043652  |
| O  | 0.178551  | -0.327549 | -0.617290 |
| H  | 0.008245  | -1.240075 | -0.923152 |
| O  | -1.764639 | 2.131358  | -0.469388 |
| N  | 4.611131  | 1.101151  | -0.253263 |
| N  | 2.495508  | 1.868807  | -0.352616 |
| N  | 4.172205  | -1.255850 | 0.160702  |
| N  | 1.818379  | -1.746422 | 0.244675  |
| N  | 3.393340  | -3.426382 | 0.400359  |
| C  | 6.054715  | 1.075385  | -0.274316 |
| C  | 3.790143  | 0.009940  | -0.050076 |
| C  | 3.763160  | 2.184387  | -0.432652 |
| C  | 2.481503  | 0.513727  | -0.127861 |
| C  | 1.436023  | -0.442509 | 0.150763  |
| C  | 3.113793  | -2.077880 | 0.277091  |
| H  | 4.158233  | 3.186042  | -0.612864 |
| H  | 0.820292  | -0.029985 | 1.319135  |
| H  | 4.332869  | -3.639224 | 0.712419  |
| H  | 2.642973  | -3.980116 | 0.795911  |
| H  | 6.482304  | 1.707273  | 0.522862  |
| H  | 6.369117  | 0.035195  | -0.109310 |
| H  | 6.450927  | 1.418009  | -1.245304 |

-----  
**Famciclovir (C8 - Secondary SOM)**

29

|    |           |           |           |
|----|-----------|-----------|-----------|
| Mo | 1.972241  | -0.612695 | -0.044133 |
| S  | 3.905047  | 0.107022  | 1.194857  |
| C  | 4.693143  | 1.298060  | 0.148625  |
| H  | 5.689088  | 1.632249  | 0.463212  |
| C  | 4.090299  | 1.822853  | -0.933483 |
| H  | 4.574826  | 2.588073  | -1.550711 |
| S  | 2.468886  | 1.321079  | -1.437370 |
| S  | 0.726304  | -0.928462 | 1.853800  |
| O  | -0.070505 | -0.320254 | -0.839910 |
| H  | -0.193757 | -0.747050 | -1.705427 |
| O  | 2.405652  | -2.071740 | -0.768528 |
| N  | -1.992590 | 0.698249  | 0.224630  |
| N  | -2.170686 | -1.417608 | -0.629242 |
| N  | -4.347155 | 1.247046  | 0.332629  |
| N  | -5.773914 | -0.534222 | -0.438758 |
| N  | -6.654766 | 1.491452  | 0.264737  |
| C  | -1.382748 | 1.886104  | 0.783034  |
| C  | -3.324527 | 0.452130  | 0.060360  |
| C  | -1.320902 | -0.517197 | -0.109447 |
| C  | -3.416177 | -0.873917 | -0.468130 |
| C  | -4.717429 | -1.320988 | -0.702663 |
| C  | -5.545228 | 0.694193  | 0.051172  |
| H  | -0.654087 | -0.920035 | 1.030900  |
| H  | -4.915857 | -2.324652 | -1.097277 |
| H  | -6.518345 | 2.259939  | 0.910309  |
| H  | -7.531158 | 0.989187  | 0.338114  |
| H  | -0.858325 | 1.642594  | 1.721184  |
| H  | -0.643955 | 2.307205  | 0.082337  |
| H  | -2.181005 | 2.616703  | 0.972230  |

-----  
-----

*B3LYP-D3 transition state coordinates for a concerted reaction mechanism for 2-amino-9-methylpurine (Famciclovir).*

**Famciclovir (C6 - Primary SOM)**

29

|    |           |           |           |
|----|-----------|-----------|-----------|
| Mo | -1.630241 | 0.531564  | -0.042663 |
| S  | -3.748303 | 0.243000  | 1.091700  |
| C  | -4.724339 | -0.739320 | -0.009848 |
| H  | -5.777256 | -0.868092 | 0.269953  |
| C  | -4.214670 | -1.357421 | -1.091736 |
| H  | -4.833125 | -1.992933 | -1.736136 |
| S  | -2.519818 | -1.174552 | -1.565887 |
| S  | -0.493406 | 0.573539  | 1.924812  |
| O  | 0.220079  | -0.434090 | -0.649720 |
| H  | 0.053049  | -1.373496 | -0.859783 |
| O  | -1.671613 | 2.060207  | -0.738123 |
| N  | 4.619449  | 1.087867  | -0.385263 |
| N  | 2.491490  | 1.813929  | -0.524840 |
| N  | 4.218944  | -1.242047 | 0.195848  |
| N  | 1.872105  | -1.760482 | 0.333204  |
| N  | 3.474334  | -3.399308 | 0.605294  |
| C  | 6.062634  | 1.084915  | -0.415417 |
| C  | 3.817196  | 0.000024  | -0.103807 |
| C  | 3.754313  | 2.144849  | -0.631019 |
| C  | 2.501246  | 0.477506  | -0.209151 |
| C  | 1.471055  | -0.471404 | 0.140574  |
| C  | 3.172815  | -2.068308 | 0.381154  |
| H  | 4.134570  | 3.136348  | -0.884017 |
| H  | 0.860143  | 0.016176  | 1.252989  |
| H  | 4.416441  | -3.574872 | 0.932983  |
| H  | 2.737392  | -3.933638 | 1.050017  |
| H  | 6.481739  | 1.792846  | 0.319776  |
| H  | 6.398692  | 0.069173  | -0.162776 |
| H  | 6.445128  | 1.348745  | -1.416197 |

-----  
**Famciclovir (C8 - Secondary SOM)**

29

|    |           |           |           |
|----|-----------|-----------|-----------|
| Mo | 1.957273  | -0.644921 | -0.033893 |
| S  | 3.843576  | 0.181632  | 1.221796  |
| C  | 4.538809  | 1.450593  | 0.199382  |
| H  | 5.507208  | 1.852700  | 0.521367  |
| C  | 3.899214  | 1.954115  | -0.872520 |
| H  | 4.329271  | 2.765200  | -1.471579 |
| S  | 2.321022  | 1.339926  | -1.396840 |
| S  | 0.704103  | -1.032647 | 1.843268  |
| O  | -0.074818 | -0.476614 | -0.876994 |
| H  | -0.189176 | -0.952892 | -1.716843 |
| O  | 2.475750  | -2.074693 | -0.759631 |
| N  | -1.935287 | 0.616249  | 0.187075  |
| N  | -2.215197 | -1.500067 | -0.640666 |
| N  | -4.260264 | 1.269245  | 0.322228  |
| N  | -5.774712 | -0.457260 | -0.410114 |
| N  | -6.555150 | 1.615607  | 0.277146  |
| C  | -1.251328 | 1.776215  | 0.716673  |
| C  | -3.277054 | 0.427402  | 0.045708  |
| C  | -1.324312 | -0.629482 | -0.140296 |
| C  | -3.433810 | -0.899353 | -0.469952 |
| C  | -4.756623 | -1.292518 | -0.678399 |
| C  | -5.485271 | 0.766377  | 0.060661  |
| H  | -0.671430 | -1.046599 | 1.006663  |
| H  | -5.003122 | -2.290962 | -1.058366 |
| H  | -6.376360 | 2.385123  | 0.911220  |
| H  | -7.452780 | 1.155644  | 0.369850  |
| H  | -0.794691 | 1.539746  | 1.691178  |
| H  | -0.443891 | 2.084198  | 0.032813  |
| H  | -1.988584 | 2.583350  | 0.826116  |

-----  
-----

*B3LYP transition state coordinates for a concerted reaction mechanism for 4-methylacridine (DACA).*

DACA (C1)

37

|    |           |           |           |
|----|-----------|-----------|-----------|
| Mo | 2.083549  | -0.420906 | 0.126182  |
| S  | 4.287855  | -0.584075 | 1.076038  |
| C  | 5.388348  | -0.253037 | -0.270284 |
| H  | 6.452438  | -0.429243 | -0.072655 |
| C  | 4.972658  | 0.245828  | -1.448480 |
| H  | 5.673963  | 0.480876  | -2.256869 |
| S  | 3.262987  | 0.559205  | -1.777972 |
| S  | 1.139540  | 0.352941  | 2.053025  |
| O  | 0.465251  | 0.789374  | -0.662042 |
| H  | 0.549565  | 1.210568  | -1.531216 |
| C  | -0.676286 | 1.403156  | 0.075954  |
| H  | -0.091620 | 1.066242  | 1.251315  |
| C  | -0.771290 | 2.812627  | -0.047114 |
| O  | 1.581053  | -2.002499 | -0.182530 |
| C  | -3.207580 | 1.335655  | -0.023732 |
| C  | -3.233621 | 2.773040  | -0.015508 |
| C  | -2.019916 | 3.452634  | -0.039605 |
| C  | -1.932069 | 0.638674  | -0.026918 |
| C  | -1.940099 | -0.748438 | -0.088545 |
| N  | -4.375415 | 0.673061  | -0.062960 |
| C  | -3.164800 | -1.448641 | -0.132610 |
| C  | -4.378080 | -0.669570 | -0.109108 |
| H  | -0.999264 | -1.305443 | -0.101921 |
| C  | -3.244486 | -2.870523 | -0.185313 |
| C  | -5.628704 | -1.366335 | -0.143579 |
| C  | -4.467162 | -3.505486 | -0.213111 |
| C  | -5.668850 | -2.741165 | -0.193611 |
| C  | -4.557887 | 3.485041  | -0.018790 |
| H  | 0.152341  | 3.397395  | -0.047319 |
| H  | -2.036107 | 4.548143  | -0.053413 |
| H  | -2.313202 | -3.444191 | -0.197619 |
| H  | -4.520347 | -4.597051 | -0.250696 |
| H  | -6.633317 | -3.258069 | -0.217007 |
| H  | -6.538402 | -0.761183 | -0.127186 |
| H  | -4.421147 | 4.577760  | 0.008138  |
| H  | -5.152837 | 3.227465  | -0.912526 |
| H  | -5.178094 | 3.186569  | 0.843884  |

-----

DACA (C2)

37

|    |           |           |           |
|----|-----------|-----------|-----------|
| Mo | 2.737805  | -0.542695 | 0.050531  |
| S  | 4.912593  | -0.183955 | 1.013934  |
| C  | 5.876951  | 0.474022  | -0.315622 |
| H  | 6.957065  | 0.542059  | -0.138905 |
| C  | 5.328297  | 0.930624  | -1.456608 |
| H  | 5.938557  | 1.370281  | -2.253747 |
| S  | 3.583713  | 0.876272  | -1.747121 |
| S  | 1.647326  | -0.206089 | 2.027085  |
| O  | 0.804104  | 0.169075  | -0.639477 |
| H  | 0.594895  | 0.087064  | -1.582854 |
| C  | -0.470395 | 0.281965  | 0.132626  |
| H  | 0.229341  | 0.015606  | 1.283237  |
| C  | -0.938676 | 1.657661  | 0.272378  |
| O  | 2.718571  | -2.165539 | -0.403310 |
| C  | -2.813097 | -0.416295 | -0.130319 |
| C  | -3.264553 | 0.949161  | 0.114995  |
| C  | -2.261229 | 1.990204  | 0.304153  |
| C  | -1.430348 | -0.709101 | -0.168101 |
| C  | -3.817794 | -1.382452 | -0.325621 |
| N  | -4.546234 | 1.293571  | 0.161269  |
| C  | -5.501177 | 0.355248  | -0.022604 |
| H  | -0.169160 | 2.424024  | 0.405405  |
| C  | -5.174785 | -1.029190 | -0.275492 |
| H  | -3.534958 | -2.423363 | -0.512891 |
| C  | -6.244516 | -1.961123 | -0.458498 |
| C  | -6.872718 | 0.739449  | 0.033776  |
| C  | -7.557636 | -1.551258 | -0.397676 |
| C  | -7.878100 | -0.186460 | -0.148428 |
| C  | -2.726078 | 3.405649  | 0.516387  |
| H  | -1.095338 | -1.735287 | -0.344801 |
| H  | -5.998186 | -3.010627 | -0.648375 |
| H  | -8.363892 | -2.276893 | -0.540983 |
| H  | -8.926234 | 0.122702  | -0.102298 |
| H  | -7.086937 | 1.793558  | 0.226997  |
| H  | -3.354717 | 3.743578  | -0.323466 |
| H  | -3.361223 | 3.478536  | 1.414275  |
| H  | -1.872952 | 4.091744  | 0.626406  |

-----

DACA (C3)

37

|    |           |           |           |
|----|-----------|-----------|-----------|
| Mo | 2.734332  | -0.471633 | -0.031511 |
| S  | 4.816901  | 0.026146  | 1.070247  |
| C  | 5.696916  | 1.045863  | -0.077431 |
| H  | 6.748363  | 1.242784  | 0.163718  |
| C  | 5.112286  | 1.610089  | -1.150091 |
| H  | 5.662847  | 2.270329  | -1.829476 |
| S  | 3.407956  | 1.331522  | -1.535671 |
| S  | 1.565553  | -0.621552 | 1.927118  |
| O  | 0.752298  | 0.129143  | -0.676376 |
| H  | 0.637666  | 0.580642  | -1.527197 |
| C  | -0.502974 | 0.262050  | 0.122949  |
| H  | 0.162303  | -0.256521 | 1.207679  |
| C  | -0.785808 | 1.648020  | 0.475258  |
| O  | 2.946588  | -1.986674 | -0.734051 |
| C  | -2.916520 | -0.136333 | -0.136325 |
| C  | -3.176537 | 1.229475  | 0.313366  |
| C  | -2.062389 | 2.094417  | 0.597641  |
| C  | -1.571017 | -0.588642 | -0.279960 |
| C  | -1.265488 | -1.997730 | -0.703111 |
| N  | -3.935843 | -0.973066 | -0.425299 |
| C  | -4.493952 | 1.644901  | 0.443884  |
| C  | -5.559688 | 0.767179  | 0.150995  |
| C  | -6.931561 | 1.124848  | 0.269646  |
| C  | -5.203641 | -0.562410 | -0.292257 |
| H  | 0.070606  | 2.292115  | 0.692410  |
| H  | -2.263739 | 3.122993  | 0.913447  |
| C  | -6.270190 | -1.470690 | -0.597959 |
| C  | -7.587125 | -1.089664 | -0.471681 |
| C  | -7.928822 | 0.220966  | -0.033048 |
| H  | -5.989567 | -2.472420 | -0.931800 |
| H  | -8.384501 | -1.800045 | -0.710946 |
| H  | -8.980365 | 0.505493  | 0.062728  |
| H  | -7.182047 | 2.135696  | 0.608296  |
| H  | -4.709031 | 2.665237  | 0.780783  |
| H  | -2.189319 | -2.519729 | -0.979845 |
| H  | -0.556368 | -2.030377 | -1.546239 |
| H  | -0.774229 | -2.543450 | 0.124547  |

-----



DACA (C5)

37

|    |           |           |           |
|----|-----------|-----------|-----------|
| Mo | 0.415961  | 1.851330  | 0.163900  |
| S  | 0.606930  | 4.063395  | 1.092902  |
| C  | 0.525695  | 5.152019  | -0.300079 |
| H  | 0.751681  | 6.205773  | -0.096939 |
| C  | 0.146218  | 4.745843  | -1.525547 |
| H  | 0.062381  | 5.444348  | -2.365769 |
| S  | -0.244932 | 3.056230  | -1.867841 |
| S  | -0.579911 | 1.014208  | 2.037513  |
| O  | -0.946749 | 0.391397  | -0.697259 |
| H  | -1.324357 | 0.557045  | -1.574851 |
| C  | -1.722310 | -0.653224 | -0.008368 |
| H  | -1.359616 | -0.145137 | 1.197957  |
| C  | -3.132623 | -0.564557 | -0.178283 |
| O  | 1.990405  | 1.272545  | 0.027151  |
| C  | -1.984892 | -3.164323 | -0.036367 |
| C  | -3.401013 | -2.990156 | -0.052699 |
| C  | -3.937235 | -1.713187 | -0.145898 |
| C  | -1.115089 | -2.001652 | -0.080876 |
| N  | 0.202130  | -2.089000 | -0.140828 |
| C  | -1.349499 | -4.414864 | -0.025933 |
| C  | 0.807701  | -3.291777 | -0.139333 |
| C  | 0.050609  | -4.518805 | -0.066838 |
| C  | 2.246071  | -3.336081 | -0.202514 |
| C  | 0.748970  | -5.765601 | -0.050039 |
| C  | 2.865435  | -4.572478 | -0.178018 |
| C  | 2.122534  | -5.784405 | -0.101727 |
| H  | -3.584760 | 0.430430  | -0.216000 |
| H  | -5.024315 | -1.589870 | -0.191874 |
| H  | 3.958004  | -4.621490 | -0.219179 |
| H  | 2.658751  | -6.738342 | -0.085064 |
| H  | 0.174080  | -6.695300 | 0.006207  |
| C  | 3.017489  | -2.049316 | -0.297183 |
| H  | -4.047139 | -3.871811 | -0.030518 |
| H  | -1.956142 | -5.326241 | 0.004751  |
| H  | 4.102293  | -2.235301 | -0.273593 |
| H  | 2.771587  | -1.506621 | -1.224410 |
| H  | 2.747712  | -1.349914 | 0.508554  |

-----

DACA (C6)

37

|    |           |           |           |
|----|-----------|-----------|-----------|
| Mo | 2.806216  | -0.520851 | 0.080659  |
| S  | 4.991379  | -0.163186 | 1.021247  |
| C  | 5.963487  | 0.417720  | -0.337848 |
| H  | 7.045177  | 0.473276  | -0.166597 |
| C  | 5.419620  | 0.834394  | -1.496258 |
| H  | 6.035222  | 1.226927  | -2.313564 |
| S  | 3.673438  | 0.799739  | -1.779682 |
| S  | 1.738996  | -0.065139 | 2.047119  |
| O  | 0.884239  | 0.207972  | -0.628667 |
| H  | 0.652395  | 0.088784  | -1.562718 |
| C  | -0.352169 | 0.496217  | 0.149074  |
| H  | 0.334711  | 0.198305  | 1.311643  |
| C  | -0.648921 | 1.923437  | 0.252611  |
| O  | 2.752066  | -2.160865 | -0.300080 |
| C  | -2.774299 | 0.050395  | -0.047301 |
| C  | -3.047602 | 1.468050  | 0.157404  |
| C  | -1.931735 | 2.371280  | 0.292598  |
| C  | -1.429357 | -0.386857 | -0.096947 |
| N  | -3.773369 | -0.842894 | -0.199003 |
| C  | -4.371180 | 1.881231  | 0.197065  |
| C  | -5.422301 | 0.949657  | 0.046445  |
| H  | 0.199823  | 2.605288  | 0.349503  |
| C  | -5.049016 | -0.432807 | -0.152803 |
| C  | -6.095622 | -1.417510 | -0.307239 |
| C  | -6.797480 | 1.313802  | 0.082076  |
| C  | -7.413890 | -1.006255 | -0.264424 |
| C  | -7.775351 | 0.355890  | -0.070929 |
| H  | -2.138415 | 3.438879  | 0.420831  |
| H  | -1.238538 | -1.452319 | -0.244055 |
| H  | -8.206351 | -1.752694 | -0.382498 |
| H  | -8.832710 | 0.634052  | -0.043586 |
| H  | -7.061042 | 2.365575  | 0.233261  |
| C  | -5.708353 | -2.857004 | -0.505625 |
| H  | -4.606370 | 2.941050  | 0.346583  |
| H  | -6.595810 | -3.500687 | -0.609539 |
| H  | -5.071905 | -2.975124 | -1.397783 |
| H  | -5.099205 | -3.219543 | 0.338643  |

-----

DACA (C7)

37

|    |           |           |           |
|----|-----------|-----------|-----------|
| Mo | 2.887383  | -0.473755 | 0.031864  |
| S  | 5.059402  | -0.121166 | 1.004416  |
| C  | 6.004303  | 0.629298  | -0.289867 |
| H  | 7.082944  | 0.713674  | -0.111336 |
| C  | 5.441851  | 1.132914  | -1.403864 |
| H  | 6.038606  | 1.629695  | -2.177328 |
| S  | 3.698384  | 1.051408  | -1.692866 |
| S  | 1.798353  | -0.260719 | 2.026330  |
| O  | 0.943251  | 0.248850  | -0.612843 |
| H  | 0.734848  | 0.235942  | -1.559919 |
| C  | -0.331224 | 0.303328  | 0.166082  |
| H  | 0.375588  | -0.022988 | 1.297876  |
| C  | -0.817851 | 1.662146  | 0.393598  |
| O  | 2.892928  | -2.072604 | -0.501124 |
| C  | -2.672262 | -0.411138 | -0.153537 |
| C  | -3.142444 | 0.925768  | 0.182578  |
| C  | -2.148119 | 1.941869  | 0.438078  |
| C  | -1.282930 | -0.676567 | -0.200491 |
| C  | -3.666086 | -1.370566 | -0.423308 |
| N  | -4.429471 | 1.254020  | 0.249453  |
| C  | -5.372819 | 0.322845  | -0.002116 |
| H  | -0.066880 | 2.434980  | 0.579287  |
| C  | -5.026827 | -1.035649 | -0.354145 |
| H  | -3.373436 | -2.392639 | -0.684841 |
| C  | -6.076974 | -1.971592 | -0.612448 |
| C  | -6.757250 | 0.704479  | 0.084895  |
| C  | -7.391892 | -1.580987 | -0.525590 |
| C  | -7.729713 | -0.243268 | -0.175338 |
| H  | -2.513757 | 2.947660  | 0.658812  |
| H  | -0.931759 | -1.683871 | -0.443311 |
| H  | -5.813142 | -2.999524 | -0.879699 |
| H  | -8.192175 | -2.299784 | -0.725858 |
| H  | -8.785260 | 0.039917  | -0.110407 |
| C  | -7.101751 | 2.121343  | 0.458046  |
| H  | -8.191841 | 2.273443  | 0.484360  |
| H  | -6.681267 | 2.383647  | 1.442605  |
| H  | -6.657984 | 2.836010  | -0.253994 |

-----

DACA (C8)

37

|    |           |           |           |
|----|-----------|-----------|-----------|
| Mo | 2.152679  | -0.413484 | 0.155685  |
| S  | 4.354792  | -0.677847 | 1.083773  |
| C  | 5.453599  | -0.484641 | -0.291038 |
| H  | 6.506432  | -0.723446 | -0.098888 |
| C  | 5.054365  | -0.010479 | -1.484895 |
| H  | 5.756916  | 0.139629  | -2.312221 |
| S  | 3.363800  | 0.398186  | -1.808210 |
| S  | 1.289771  | 0.475808  | 2.067905  |
| O  | 0.615654  | 0.884973  | -0.655277 |
| H  | 0.764060  | 1.329629  | -1.504308 |
| C  | -0.479933 | 1.578153  | 0.079981  |
| H  | 0.089546  | 1.230965  | 1.261128  |
| C  | -0.489296 | 2.992035  | -0.056766 |
| O  | 1.533594  | -1.964799 | -0.084091 |
| C  | -3.007793 | 1.645656  | 0.006463  |
| C  | -2.932867 | 3.070992  | 0.012859  |
| C  | -1.698794 | 3.703249  | -0.035367 |
| C  | -1.774666 | 0.879310  | -0.008220 |
| C  | -1.862848 | -0.505040 | -0.076858 |
| N  | -4.212526 | 1.049995  | -0.024456 |
| C  | -3.124951 | -1.133765 | -0.117238 |
| C  | -4.293457 | -0.288546 | -0.079243 |
| H  | -0.957070 | -1.116743 | -0.101532 |
| C  | -3.275608 | -2.549168 | -0.187414 |
| C  | -5.600857 | -0.902046 | -0.109191 |
| C  | -4.532010 | -3.108714 | -0.215896 |
| C  | -5.687832 | -2.278174 | -0.176149 |
| H  | -3.870811 | 3.628708  | 0.021038  |
| H  | 0.468781  | 3.518809  | -0.065789 |
| H  | -1.658683 | 4.797344  | -0.056365 |
| H  | -2.376697 | -3.171575 | -0.214078 |
| H  | -4.652553 | -4.194504 | -0.267937 |
| H  | -6.677091 | -2.747606 | -0.199224 |
| C  | -6.818069 | -0.019359 | -0.067618 |
| H  | -7.744840 | -0.613187 | -0.100645 |
| H  | -6.824076 | 0.601936  | 0.843111  |
| H  | -6.818344 | 0.691789  | -0.910190 |

-----

DACA (C9 - Primary SOM)

37

|    |           |           |           |
|----|-----------|-----------|-----------|
| Mo | 1.993667  | -0.529154 | 0.088718  |
| S  | 3.955339  | 0.363334  | 1.152500  |
| C  | 4.812790  | 1.214352  | -0.141455 |
| H  | 5.826485  | 1.555292  | 0.100536  |
| C  | 4.250344  | 1.497949  | -1.330249 |
| H  | 4.784244  | 2.059402  | -2.104749 |
| S  | 2.607687  | 0.976235  | -1.733555 |
| S  | 0.736892  | -0.370526 | 1.993980  |
| O  | -0.005192 | -0.188895 | -0.736674 |
| H  | -0.070281 | 0.322809  | -1.559638 |
| C  | -1.293210 | -0.164199 | -0.039029 |
| H  | -0.627181 | -0.293308 | 1.202348  |
| C  | -1.968475 | 1.114412  | -0.032694 |
| O  | 2.336486  | -2.139130 | -0.270400 |
| C  | -3.538383 | -1.192217 | -0.113315 |
| N  | -4.155141 | -0.001994 | 0.035494  |
| C  | -3.407430 | 1.116047  | 0.050233  |
| C  | -2.110412 | -1.345938 | -0.213222 |
| C  | -1.254989 | 2.340205  | -0.043667 |
| C  | -4.089392 | 2.386086  | 0.133308  |
| C  | -3.349290 | 3.553551  | 0.113905  |
| C  | -1.934841 | 3.540940  | 0.020550  |
| C  | -1.550088 | -2.632481 | -0.413152 |
| C  | -4.341213 | -2.372691 | -0.205374 |
| C  | -2.363026 | -3.748013 | -0.508560 |
| C  | -3.770648 | -3.612592 | -0.397959 |
| C  | -5.590877 | 2.391228  | 0.226473  |
| H  | -0.164217 | 2.327766  | -0.104850 |
| H  | -1.381808 | 4.483935  | 0.010113  |
| H  | -3.871517 | 4.514566  | 0.171422  |
| H  | -5.422957 | -2.239955 | -0.126315 |
| H  | -4.406739 | -4.500527 | -0.469306 |
| H  | -1.918728 | -4.734781 | -0.664123 |
| H  | -0.464791 | -2.733525 | -0.487856 |
| H  | -5.985004 | 3.418282  | 0.280497  |
| H  | -6.041775 | 1.878441  | -0.639206 |
| H  | -5.932861 | 1.829462  | 1.111578  |

-----  
-----

*B3LYP-D3 transition state coordinates for a concerted reaction mechanism for 4-methylacridine (DACA).*

DACA (C1)

37

|    |           |           |           |
|----|-----------|-----------|-----------|
| Mo | 2.024479  | -0.368735 | 0.128654  |
| S  | 4.216194  | -0.652626 | 1.079736  |
| C  | 5.327484  | -0.407230 | -0.278636 |
| H  | 6.379754  | -0.651090 | -0.088406 |
| C  | 4.937304  | 0.110327  | -1.458439 |
| H  | 5.649377  | 0.290631  | -2.271942 |
| S  | 3.249938  | 0.539925  | -1.780814 |
| S  | 1.107132  | 0.457205  | 2.044067  |
| O  | 0.453376  | 0.893236  | -0.671793 |
| H  | 0.454661  | 1.202234  | -1.590230 |
| C  | -0.705455 | 1.478577  | 0.052847  |
| H  | -0.123939 | 1.174493  | 1.232021  |
| C  | -0.847375 | 2.882270  | -0.085784 |
| O  | 1.433221  | -1.921703 | -0.173018 |
| C  | -3.229412 | 1.317196  | -0.022286 |
| C  | -3.304793 | 2.752347  | -0.007415 |
| C  | -2.117461 | 3.476718  | -0.056596 |
| C  | -1.930614 | 0.668419  | -0.042581 |
| C  | -1.882237 | -0.716667 | -0.112006 |
| N  | -4.372571 | 0.612358  | -0.054022 |
| C  | -3.080122 | -1.460912 | -0.152093 |
| C  | -4.322644 | -0.729128 | -0.112617 |
| H  | -0.922334 | -1.238760 | -0.135927 |
| C  | -3.102135 | -2.883580 | -0.222134 |
| C  | -5.544640 | -1.474571 | -0.145009 |
| C  | -4.299173 | -3.566031 | -0.251143 |
| C  | -5.529994 | -2.849627 | -0.212176 |
| C  | -4.655720 | 3.410972  | 0.016508  |
| H  | 0.058961  | 3.492315  | -0.102926 |
| H  | -2.175158 | 4.570738  | -0.073270 |
| H  | -2.147311 | -3.416989 | -0.248182 |
| H  | -4.309622 | -4.658245 | -0.303201 |
| H  | -6.473392 | -3.403977 | -0.235950 |
| H  | -6.477698 | -0.906570 | -0.114909 |
| H  | -4.566183 | 4.508678  | 0.042405  |
| H  | -5.256642 | 3.125689  | -0.864696 |
| H  | -5.243552 | 3.083100  | 0.891213  |

---

DACA (C2)

37

|    |           |           |           |
|----|-----------|-----------|-----------|
| Mo | 2.735001  | -0.547545 | 0.055480  |
| S  | 4.922204  | -0.181724 | 0.998767  |
| C  | 5.865320  | 0.483431  | -0.344532 |
| H  | 6.947580  | 0.558527  | -0.182815 |
| C  | 5.301240  | 0.937648  | -1.479853 |
| H  | 5.902587  | 1.379590  | -2.282817 |
| S  | 3.552401  | 0.873874  | -1.752843 |
| S  | 1.644764  | -0.206874 | 2.030066  |
| O  | 0.805784  | 0.148800  | -0.637827 |
| H  | 0.598501  | 0.097395  | -1.583545 |
| C  | -0.465981 | 0.266514  | 0.136806  |
| H  | 0.221570  | 0.004621  | 1.281537  |
| C  | -0.925542 | 1.644789  | 0.271167  |
| O  | 2.716574  | -2.170227 | -0.395384 |
| C  | -2.807307 | -0.424806 | -0.130301 |
| C  | -3.252582 | 0.943963  | 0.112969  |
| C  | -2.246047 | 1.981893  | 0.300374  |
| C  | -1.426800 | -0.723269 | -0.165623 |
| C  | -3.816157 | -1.386347 | -0.325431 |
| N  | -4.532170 | 1.294872  | 0.159559  |
| C  | -5.491037 | 0.360578  | -0.022840 |
| H  | -0.148128 | 2.402827  | 0.404177  |
| C  | -5.170965 | -1.025932 | -0.275387 |
| H  | -3.538301 | -2.428744 | -0.511632 |
| C  | -6.244646 | -1.952951 | -0.457984 |
| C  | -6.860357 | 0.751210  | 0.034407  |
| C  | -7.555981 | -1.536956 | -0.396441 |
| C  | -7.870140 | -0.170453 | -0.147019 |
| C  | -2.711102 | 3.397224  | 0.509800  |
| H  | -1.088524 | -1.748548 | -0.339002 |
| H  | -6.002438 | -3.003382 | -0.648051 |
| H  | -8.365710 | -2.258752 | -0.539454 |
| H  | -8.916799 | 0.143379  | -0.099947 |
| H  | -7.069597 | 1.806346  | 0.227666  |
| H  | -3.339457 | 3.730354  | -0.332127 |
| H  | -3.349888 | 3.466837  | 1.405282  |
| H  | -1.860226 | 4.085961  | 0.621590  |

-----



DACA (C3)

37

|    |           |           |           |
|----|-----------|-----------|-----------|
| Mo | 2.708876  | -0.476041 | -0.044910 |
| S  | 4.819387  | -0.048340 | 1.042561  |
| C  | 5.699614  | 0.987037  | -0.092735 |
| H  | 6.758056  | 1.161201  | 0.136175  |
| C  | 5.109797  | 1.590219  | -1.142143 |
| H  | 5.664596  | 2.258625  | -1.810408 |
| S  | 3.394660  | 1.352308  | -1.512126 |
| S  | 1.543616  | -0.630026 | 1.914401  |
| O  | 0.742801  | 0.163512  | -0.678308 |
| H  | 0.616677  | 0.596314  | -1.536849 |
| C  | -0.509144 | 0.292992  | 0.124083  |
| H  | 0.143829  | -0.231146 | 1.203253  |
| C  | -0.794740 | 1.677229  | 0.474266  |
| O  | 2.883967  | -1.981454 | -0.776751 |
| C  | -2.914701 | -0.125414 | -0.135933 |
| C  | -3.182020 | 1.240971  | 0.311533  |
| C  | -2.074223 | 2.114873  | 0.596522  |
| C  | -1.567972 | -0.567067 | -0.275940 |
| C  | -1.229848 | -1.973557 | -0.677441 |
| N  | -3.927513 | -0.970262 | -0.423487 |
| C  | -4.501776 | 1.648189  | 0.441158  |
| C  | -5.561350 | 0.762969  | 0.148697  |
| C  | -6.934951 | 1.113469  | 0.266525  |
| C  | -5.197308 | -0.566122 | -0.291898 |
| H  | 0.063128  | 2.320495  | 0.687069  |
| H  | -2.284195 | 3.141904  | 0.911850  |
| C  | -6.258636 | -1.480552 | -0.596843 |
| C  | -7.577766 | -1.105857 | -0.472415 |
| C  | -7.927087 | 0.203563  | -0.035637 |
| H  | -5.972366 | -2.481208 | -0.929144 |
| H  | -8.371181 | -1.820948 | -0.710885 |
| H  | -8.980274 | 0.482436  | 0.058886  |
| H  | -7.190543 | 2.123502  | 0.603874  |
| H  | -4.724500 | 2.667208  | 0.776846  |
| H  | -2.134013 | -2.522229 | -0.967763 |
| H  | -0.497752 | -1.997183 | -1.500823 |
| H  | -0.741253 | -2.492639 | 0.169177  |

-----

DACA (C5)

37

|    |           |           |           |
|----|-----------|-----------|-----------|
| Mo | 0.342441  | 1.902102  | 0.265972  |
| S  | 0.625293  | 4.092573  | 1.220437  |
| C  | 0.725731  | 5.153528  | -0.192984 |
| H  | 1.054518  | 6.182406  | -0.002733 |
| C  | 0.348971  | 4.759530  | -1.425196 |
| H  | 0.377465  | 5.449721  | -2.276732 |
| S  | -0.224341 | 3.121139  | -1.768503 |
| S  | -0.849332 | 1.128351  | 2.009772  |
| O  | -0.720735 | 0.250174  | -0.781481 |
| H  | 0.058688  | -0.366188 | -0.891576 |
| C  | -1.671799 | -0.632042 | -0.126198 |
| H  | -1.520701 | -0.171300 | 1.046061  |
| C  | -3.067854 | -0.531689 | -0.460469 |
| O  | 1.885533  | 1.215664  | 0.209470  |
| C  | -1.985850 | -3.149049 | 0.042265  |
| C  | -3.389240 | -2.933820 | -0.016328 |
| C  | -3.881641 | -1.653128 | -0.310948 |
| C  | -1.116776 | -2.005869 | -0.111508 |
| N  | 0.189872  | -2.077244 | -0.262812 |
| C  | -1.327308 | -4.388520 | 0.139391  |
| C  | 0.826497  | -3.267528 | -0.173585 |
| C  | 0.075988  | -4.477344 | 0.063295  |
| C  | 2.252536  | -3.300527 | -0.303085 |
| C  | 0.793470  | -5.708344 | 0.173492  |
| C  | 2.891627  | -4.523128 | -0.177961 |
| C  | 2.164577  | -5.722625 | 0.058905  |
| H  | -3.487129 | 0.457818  | -0.653615 |
| H  | -4.962480 | -1.526066 | -0.435021 |
| H  | 3.981728  | -4.567134 | -0.260801 |
| H  | 2.710482  | -6.666573 | 0.151155  |
| H  | 0.234660  | -6.631892 | 0.353324  |
| C  | 2.995898  | -2.018194 | -0.564472 |
| H  | -4.068808 | -3.783591 | 0.086556  |
| H  | -1.915526 | -5.305278 | 0.252103  |
| H  | 4.084830  | -2.176167 | -0.536652 |
| H  | 2.732575  | -1.609081 | -1.554925 |
| H  | 2.724763  | -1.227895 | 0.153420  |

-----

DACA (C6)

37

|    |           |           |           |
|----|-----------|-----------|-----------|
| Mo | 2.814589  | -0.528286 | 0.077616  |
| S  | 5.010537  | -0.119008 | 0.985337  |
| C  | 5.932220  | 0.528068  | -0.381002 |
| H  | 7.015287  | 0.617371  | -0.232753 |
| C  | 5.350812  | 0.951716  | -1.519451 |
| H  | 5.937289  | 1.385172  | -2.337770 |
| S  | 3.600064  | 0.860108  | -1.770050 |
| S  | 1.752102  | -0.143085 | 2.058057  |
| O  | 0.876777  | 0.146272  | -0.603857 |
| H  | 0.650880  | 0.119297  | -1.546224 |
| C  | -0.350933 | 0.427756  | 0.192070  |
| H  | 0.329562  | 0.101260  | 1.332215  |
| C  | -0.625061 | 1.855696  | 0.332321  |
| O  | 2.804667  | -2.160511 | -0.333527 |
| C  | -2.774876 | 0.018555  | -0.026530 |
| C  | -3.028001 | 1.435447  | 0.213624  |
| C  | -1.901130 | 2.320297  | 0.378256  |
| C  | -1.437343 | -0.436420 | -0.078841 |
| N  | -3.785581 | -0.855273 | -0.209704 |
| C  | -4.344980 | 1.867707  | 0.256414  |
| C  | -5.408396 | 0.956181  | 0.073045  |
| H  | 0.237668  | 2.515776  | 0.451800  |
| C  | -5.054513 | -0.425667 | -0.162216 |
| C  | -6.113742 | -1.388950 | -0.354119 |
| C  | -6.777943 | 1.339706  | 0.108667  |
| C  | -7.426157 | -0.960246 | -0.309335 |
| C  | -7.768885 | 0.401143  | -0.078594 |
| H  | -2.095207 | 3.386508  | 0.534460  |
| H  | -1.252950 | -1.498040 | -0.255757 |
| H  | -8.228446 | -1.691209 | -0.454220 |
| H  | -8.822078 | 0.694484  | -0.051881 |
| H  | -7.026726 | 2.390780  | 0.287304  |
| C  | -5.740497 | -2.825598 | -0.593527 |
| H  | -4.565427 | 2.926127  | 0.432875  |
| H  | -6.631749 | -3.459088 | -0.724642 |
| H  | -5.096344 | -2.918521 | -1.483192 |
| H  | -5.140053 | -3.217285 | 0.243909  |

-----

DACA (C7)

37

|    |           |           |           |
|----|-----------|-----------|-----------|
| Mo | 2.882944  | -0.475511 | 0.038428  |
| S  | 5.063572  | -0.130569 | 1.004962  |
| C  | 6.000088  | 0.626306  | -0.293783 |
| H  | 7.080327  | 0.710418  | -0.123307 |
| C  | 5.431873  | 1.134938  | -1.403571 |
| H  | 6.026986  | 1.633995  | -2.177194 |
| S  | 3.685395  | 1.054871  | -1.685637 |
| S  | 1.787046  | -0.257261 | 2.027226  |
| O  | 0.947003  | 0.240882  | -0.618898 |
| H  | 0.742502  | 0.239934  | -1.566694 |
| C  | -0.327567 | 0.298076  | 0.157430  |
| H  | 0.363909  | -0.024550 | 1.290133  |
| C  | -0.807811 | 1.658638  | 0.381725  |
| O  | 2.883082  | -2.072711 | -0.497142 |
| C  | -2.665286 | -0.414611 | -0.162096 |
| C  | -3.132332 | 0.924487  | 0.174315  |
| C  | -2.137039 | 1.940946  | 0.426742  |
| C  | -1.277648 | -0.682335 | -0.209849 |
| C  | -3.660360 | -1.372932 | -0.429774 |
| N  | -4.418284 | 1.254519  | 0.244980  |
| C  | -5.362826 | 0.323657  | -0.003262 |
| H  | -0.049817 | 2.424672  | 0.565498  |
| C  | -5.019906 | -1.035521 | -0.356564 |
| H  | -3.369200 | -2.395322 | -0.691584 |
| C  | -6.072330 | -1.969587 | -0.611233 |
| C  | -6.745581 | 0.707028  | 0.089456  |
| C  | -7.386437 | -1.576677 | -0.518939 |
| C  | -7.721185 | -0.238386 | -0.166868 |
| H  | -2.501987 | 2.947238  | 0.646299  |
| H  | -0.921313 | -1.687774 | -0.451347 |
| H  | -5.810791 | -2.997816 | -0.879622 |
| H  | -8.188584 | -2.294416 | -0.715496 |
| H  | -8.775366 | 0.046301  | -0.097584 |
| C  | -7.080493 | 2.125242  | 0.464986  |
| H  | -8.169089 | 2.286659  | 0.498855  |
| H  | -6.649041 | 2.382258  | 1.446161  |
| H  | -6.633648 | 2.835262  | -0.249750 |

-----

DACA (C8)

37

|    |           |           |           |
|----|-----------|-----------|-----------|
| Mo | 2.133452  | -0.374207 | 0.162163  |
| S  | 4.320861  | -0.744107 | 1.094530  |
| C  | 5.423203  | -0.602461 | -0.286018 |
| H  | 6.462832  | -0.900186 | -0.103276 |
| C  | 5.044702  | -0.099549 | -1.475862 |
| H  | 5.752836  | 0.015569  | -2.304456 |
| S  | 3.378845  | 0.412218  | -1.788876 |
| S  | 1.279820  | 0.530676  | 2.071556  |
| O  | 0.626244  | 0.955501  | -0.645373 |
| H  | 0.670314  | 1.288517  | -1.554514 |
| C  | -0.474184 | 1.641639  | 0.082731  |
| H  | 0.091554  | 1.302277  | 1.263657  |
| C  | -0.493468 | 3.054159  | -0.057904 |
| O  | 1.459486  | -1.899268 | -0.095606 |
| C  | -2.999603 | 1.682669  | 0.014233  |
| C  | -2.937742 | 3.108398  | 0.020917  |
| C  | -1.709393 | 3.753506  | -0.031206 |
| C  | -1.759120 | 0.929734  | -0.001375 |
| C  | -1.826790 | -0.455533 | -0.064015 |
| N  | -4.197644 | 1.073764  | -0.017400 |
| C  | -3.081465 | -1.097839 | -0.104028 |
| C  | -4.260291 | -0.265881 | -0.070631 |
| H  | -0.912891 | -1.054836 | -0.085715 |
| C  | -3.214669 | -2.514852 | -0.172177 |
| C  | -5.559513 | -0.894922 | -0.104427 |
| C  | -4.464634 | -3.088928 | -0.204523 |
| C  | -5.630662 | -2.271827 | -0.169982 |
| H  | -3.880872 | 3.657397  | 0.031357  |
| H  | 0.463355  | 3.581720  | -0.076716 |
| H  | -1.681239 | 4.847900  | -0.053318 |
| H  | -2.307449 | -3.125277 | -0.195213 |
| H  | -4.572557 | -4.176046 | -0.256058 |
| H  | -6.614275 | -2.752690 | -0.196346 |
| C  | -6.783722 | -0.022123 | -0.067768 |
| H  | -7.707748 | -0.620175 | -0.104162 |
| H  | -6.793624 | 0.599538  | 0.842687  |
| H  | -6.781912 | 0.689456  | -0.909951 |

-----

DACA (C9 - Primary SOM)

37

|    |           |           |           |
|----|-----------|-----------|-----------|
| Mo | 1.983760  | -0.538562 | 0.081780  |
| S  | 3.966104  | 0.318552  | 1.146745  |
| C  | 4.807689  | 1.197475  | -0.140599 |
| H  | 5.828429  | 1.525552  | 0.090562  |
| C  | 4.227607  | 1.517808  | -1.312564 |
| H  | 4.755357  | 2.095378  | -2.079733 |
| S  | 2.571236  | 1.023368  | -1.701565 |
| S  | 0.723012  | -0.396236 | 1.982240  |
| O  | -0.008522 | -0.220676 | -0.746520 |
| H  | -0.095245 | 0.226169  | -1.603896 |
| C  | -1.292355 | -0.179603 | -0.045118 |
| H  | -0.639205 | -0.316530 | 1.188406  |
| C  | -1.942047 | 1.108566  | -0.033410 |
| O  | 2.316668  | -2.143936 | -0.304550 |
| C  | -3.549442 | -1.171039 | -0.117081 |
| N  | -4.146741 | 0.029061  | 0.031990  |
| C  | -3.379126 | 1.134597  | 0.055108  |
| C  | -2.124388 | -1.346630 | -0.218451 |
| C  | -1.199053 | 2.315175  | -0.040657 |
| C  | -4.033819 | 2.416903  | 0.147947  |
| C  | -3.268815 | 3.568780  | 0.133893  |
| C  | -1.854511 | 3.528864  | 0.034701  |
| C  | -1.574923 | -2.637923 | -0.409768 |
| C  | -4.366259 | -2.341710 | -0.209133 |
| C  | -2.401360 | -3.743722 | -0.501990 |
| C  | -3.808212 | -3.588754 | -0.396388 |
| C  | -5.534674 | 2.447850  | 0.241777  |
| H  | -0.109367 | 2.273263  | -0.111450 |
| H  | -1.283440 | 4.460990  | 0.027357  |
| H  | -3.770959 | 4.539854  | 0.200256  |
| H  | -5.446821 | -2.197719 | -0.132965 |
| H  | -4.454793 | -4.469130 | -0.466797 |
| H  | -1.970325 | -4.737305 | -0.650947 |
| H  | -0.489685 | -2.745565 | -0.479410 |
| H  | -5.911996 | 3.477744  | 0.342826  |
| H  | -5.991803 | 1.983076  | -0.647870 |
| H  | -5.885298 | 1.848925  | 1.098265  |

-----  
-----

*B3LYP-D3 transition state coordinates for a concerted reaction mechanism for phenanthridine.*

Phenanthridine (C1)

34

|    |           |           |           |
|----|-----------|-----------|-----------|
| Mo | 1.923798  | -0.544243 | 0.029059  |
| S  | 3.784232  | 0.561489  | 1.086476  |
| C  | 4.463598  | 1.597652  | -0.177906 |
| H  | 5.428913  | 2.065998  | 0.049215  |
| C  | 3.814611  | 1.859999  | -1.326893 |
| H  | 4.229921  | 2.534460  | -2.084411 |
| S  | 2.236168  | 1.147679  | -1.694724 |
| S  | 0.723089  | -0.656250 | 1.975424  |
| O  | -0.121658 | -0.559770 | -0.717916 |
| H  | -0.208621 | -0.706466 | -1.673539 |
| C  | -1.279534 | -1.254151 | -0.027173 |
| H  | -0.634647 | -1.019313 | 1.179065  |
| C  | -2.564978 | -0.568242 | -0.084646 |
| O  | 2.495745  | -2.056864 | -0.454066 |
| C  | -2.428238 | -3.396930 | -0.402833 |
| C  | -3.669787 | -2.764389 | -0.399730 |
| C  | -3.747353 | -1.360444 | -0.256556 |
| C  | -1.255905 | -2.661820 | -0.265666 |
| N  | -5.012359 | -0.804427 | -0.318316 |
| C  | -2.724614 | 0.860328  | 0.082099  |
| C  | -4.048583 | 1.394671  | 0.000269  |
| C  | -5.137044 | 0.481453  | -0.207734 |
| C  | -1.664013 | 1.772781  | 0.339392  |
| C  | -4.275870 | 2.782659  | 0.143009  |
| C  | -3.221579 | 3.648180  | 0.377400  |
| C  | -1.913669 | 3.128209  | 0.482804  |
| H  | -0.275813 | -3.147171 | -0.282260 |
| H  | -2.366213 | -4.481799 | -0.532729 |
| H  | -4.605148 | -3.310864 | -0.529760 |
| H  | -5.301879 | 3.157396  | 0.068503  |
| H  | -3.397266 | 4.722262  | 0.485504  |
| H  | -0.645072 | 1.410048  | 0.442224  |
| H  | -1.074208 | 3.800527  | 0.680062  |
| H  | -6.154966 | 0.897425  | -0.268530 |

---



Phenanthridine (C2)

34

|    |           |           |           |
|----|-----------|-----------|-----------|
| Mo | 2.414936  | -0.469047 | 0.116532  |
| S  | 4.622307  | -0.212245 | 1.042052  |
| C  | 5.619405  | 0.328548  | -0.316466 |
| H  | 6.701972  | 0.343873  | -0.141962 |
| C  | 5.095258  | 0.761556  | -1.477702 |
| H  | 5.726059  | 1.130359  | -2.294521 |
| S  | 3.349628  | 0.784121  | -1.764134 |
| S  | 1.377509  | 0.033318  | 2.092212  |
| O  | 0.566959  | 0.407582  | -0.578306 |
| H  | 0.429285  | 0.614796  | -1.515272 |
| C  | -0.664928 | 0.774796  | 0.195694  |
| H  | 0.012223  | 0.442297  | 1.356827  |
| C  | -0.934884 | 2.194383  | 0.238043  |
| O  | 2.263969  | -2.106537 | -0.250432 |
| C  | -3.092277 | 0.369029  | -0.017607 |
| C  | -3.341150 | 1.778555  | 0.121736  |
| C  | -2.224284 | 2.659692  | 0.234954  |
| C  | -1.770018 | -0.095985 | -0.027008 |
| C  | -4.257828 | -0.497619 | -0.154694 |
| N  | -4.593312 | 2.324052  | 0.131222  |
| C  | -5.629771 | 1.538788  | 0.012485  |
| C  | -5.547668 | 0.111758  | -0.135603 |
| C  | -6.708015 | -0.691977 | -0.259635 |
| C  | -4.184990 | -1.904102 | -0.297190 |
| C  | -5.333181 | -2.673041 | -0.415993 |
| C  | -6.607110 | -2.065129 | -0.399165 |
| H  | -0.083067 | 2.873590  | 0.329751  |
| H  | -2.442184 | 3.727772  | 0.313425  |
| H  | -6.625375 | 2.005979  | 0.025040  |
| H  | -1.546878 | -1.158644 | -0.141766 |
| H  | -7.688286 | -0.205148 | -0.242328 |
| H  | -7.507362 | -2.678913 | -0.493221 |
| H  | -5.248796 | -3.758208 | -0.521917 |
| H  | -3.211367 | -2.397479 | -0.305436 |

-----

Phenanthridine (C3)

34

|    |           |           |           |
|----|-----------|-----------|-----------|
| Mo | 2.693200  | -0.426734 | -0.007862 |
| S  | 4.709611  | 0.175557  | 1.167652  |
| C  | 5.510243  | 1.354830  | 0.119317  |
| H  | 6.531457  | 1.635241  | 0.404089  |
| C  | 4.895986  | 1.933369  | -0.928769 |
| H  | 5.393400  | 2.691310  | -1.544507 |
| S  | 3.236229  | 1.521818  | -1.380005 |
| S  | 1.527001  | -0.826858 | 1.916896  |
| O  | 0.685538  | 0.061823  | -0.614256 |
| H  | 0.508339  | 0.478816  | -1.471535 |
| C  | -0.609693 | -0.091092 | 0.138031  |
| H  | 0.113356  | -0.597776 | 1.195238  |
| C  | -1.183109 | 1.163786  | 0.572384  |
| O  | 3.048501  | -1.860389 | -0.817215 |
| C  | -2.893851 | -0.853938 | -0.388770 |
| C  | -3.453842 | 0.364207  | 0.129270  |
| C  | -2.541620 | 1.357118  | 0.592930  |
| C  | -1.504432 | -1.046040 | -0.416370 |
| N  | -3.690544 | -1.871238 | -0.890771 |
| C  | -4.885454 | 0.516187  | 0.134684  |
| C  | -4.978566 | -1.721312 | -0.877745 |
| C  | -5.671794 | -0.560313 | -0.381458 |
| C  | -5.577429 | 1.662085  | 0.616846  |
| C  | -7.081785 | -0.471792 | -0.401036 |
| C  | -6.960331 | 1.727165  | 0.587482  |
| C  | -7.728604 | 0.656362  | 0.076592  |
| H  | -0.499205 | 1.935988  | 0.934311  |
| H  | -2.925561 | 2.307452  | 0.971749  |
| H  | -1.119257 | -1.983043 | -0.823674 |
| H  | -5.013890 | 2.505203  | 1.020798  |
| H  | -7.464571 | 2.621577  | 0.965762  |
| H  | -8.819766 | 0.721939  | 0.059441  |
| H  | -7.655290 | -1.314058 | -0.801621 |
| H  | -5.585727 | -2.547853 | -1.279494 |

-----

Phenanthridine (C4)

34

|    |           |           |           |
|----|-----------|-----------|-----------|
| Mo | 2.213154  | -0.555478 | 0.152438  |
| S  | 4.400201  | -0.266527 | 1.121297  |
| C  | 5.405604  | 0.351576  | -0.196828 |
| H  | 6.482557  | 0.400405  | 0.004890  |
| C  | 4.894793  | 0.800636  | -1.357937 |
| H  | 5.531340  | 1.215501  | -2.147667 |
| S  | 3.158633  | 0.754741  | -1.691631 |
| S  | 1.154728  | -0.133786 | 2.134808  |
| O  | 0.395420  | 0.419048  | -0.529254 |
| H  | 0.418341  | 0.875159  | -1.384704 |
| C  | -0.742055 | 0.941926  | 0.265624  |
| H  | -0.161121 | 0.423721  | 1.407859  |
| C  | -0.766829 | 2.366722  | 0.377666  |
| O  | 2.111598  | -2.184114 | -0.254285 |
| C  | -3.242926 | 1.004323  | 0.129090  |
| C  | -3.202503 | 2.398495  | 0.358987  |
| C  | -1.971406 | 3.053799  | 0.463984  |
| C  | -2.018546 | 0.267700  | 0.031043  |
| N  | -1.975085 | -1.067982 | -0.226565 |
| C  | -4.479874 | 0.257112  | -0.050296 |
| C  | -4.389578 | -1.141542 | -0.315079 |
| C  | -3.084118 | -1.732419 | -0.392923 |
| C  | -5.771907 | 0.836503  | 0.022043  |
| C  | -5.568569 | -1.907238 | -0.494643 |
| C  | -6.815718 | -1.314327 | -0.416297 |
| C  | -6.913401 | 0.070570  | -0.155552 |
| H  | 0.189664  | 2.886975  | 0.473442  |
| H  | -1.953897 | 4.138283  | 0.611606  |
| H  | -4.125227 | 2.976315  | 0.424846  |
| H  | -3.002766 | -2.809041 | -0.599932 |
| H  | -5.875174 | 1.904099  | 0.223813  |
| H  | -7.898039 | 0.543144  | -0.092019 |
| H  | -7.722258 | -1.910330 | -0.554806 |
| H  | -5.472240 | -2.978691 | -0.695877 |

-----

Phenanthridine (C6 - Primary SOM)

34

|    |           |           |           |
|----|-----------|-----------|-----------|
| Mo | 2.017612  | -0.357218 | 0.053682  |
| S  | 4.084457  | 0.245423  | 1.140406  |
| C  | 4.980352  | 1.173636  | -0.068431 |
| H  | 6.017164  | 1.418834  | 0.190762  |
| C  | 4.421738  | 1.623981  | -1.206312 |
| H  | 4.982909  | 2.234246  | -1.922726 |
| S  | 2.748953  | 1.254125  | -1.640469 |
| S  | 0.858518  | -0.298344 | 1.986416  |
| O  | 0.082238  | 0.251009  | -0.722300 |
| H  | 0.093977  | 1.159744  | -1.079578 |
| C  | -1.205148 | 0.212800  | 0.047287  |
| H  | -0.593473 | 0.016670  | 1.193478  |
| N  | -1.787991 | 1.418891  | -0.009571 |
| O  | 2.179192  | -1.953600 | -0.471248 |
| C  | -3.411626 | -0.925046 | -0.145761 |
| C  | -4.018966 | 0.393536  | 0.034733  |
| C  | -3.137027 | 1.527199  | 0.045377  |
| C  | -1.996054 | -1.023836 | -0.198407 |
| C  | -1.378046 | -2.270406 | -0.416299 |
| C  | -4.166726 | -2.109843 | -0.312574 |
| C  | -2.146316 | -3.418205 | -0.578798 |
| C  | -3.547346 | -3.335201 | -0.520442 |
| C  | -3.709962 | 2.829684  | 0.118216  |
| C  | -5.407477 | 0.611710  | 0.139913  |
| C  | -5.941383 | 1.892829  | 0.233321  |
| C  | -5.079072 | 3.008023  | 0.212629  |
| H  | -6.087461 | -0.243509 | 0.148555  |
| H  | -7.022672 | 2.031603  | 0.319130  |
| H  | -5.493199 | 4.019037  | 0.279250  |
| H  | -3.019372 | 3.676183  | 0.113450  |
| H  | -0.289423 | -2.336971 | -0.461122 |
| H  | -1.655961 | -4.380214 | -0.750417 |
| H  | -4.155867 | -4.235923 | -0.645897 |
| H  | -5.257188 | -2.063264 | -0.289796 |

-----

Phenanthridine (C7)

34

|    |           |           |           |
|----|-----------|-----------|-----------|
| Mo | 2.176416  | -0.500583 | 0.145175  |
| S  | 4.397491  | -0.401163 | 1.070029  |
| C  | 5.418000  | 0.170556  | -0.258703 |
| H  | 6.499779  | 0.130263  | -0.083815 |
| C  | 4.915829  | 0.687847  | -1.394443 |
| H  | 5.562087  | 1.073159  | -2.191035 |
| S  | 3.173125  | 0.783946  | -1.682493 |
| S  | 1.168600  | -0.037370 | 2.143634  |
| O  | 0.388902  | 0.534675  | -0.511234 |
| H  | 0.396467  | 0.988336  | -1.368726 |
| C  | -0.756861 | 1.049151  | 0.300061  |
| H  | -0.135741 | 0.558522  | 1.439948  |
| C  | -0.810431 | 2.471510  | 0.404365  |
| O  | 1.909786  | -2.106504 | -0.286308 |
| C  | -3.252143 | 1.047604  | 0.148656  |
| C  | -3.248776 | 2.442547  | 0.373866  |
| C  | -2.033743 | 3.127204  | 0.483272  |
| C  | -2.013191 | 0.346389  | 0.074734  |
| C  | -2.028598 | -1.061005 | -0.182845 |
| C  | -4.462644 | 0.261124  | -0.049114 |
| C  | -4.325069 | -1.139400 | -0.300608 |
| N  | -3.109802 | -1.775409 | -0.366221 |
| C  | -5.767972 | 0.810157  | -0.007976 |
| C  | -5.489686 | -1.926951 | -0.496952 |
| C  | -6.751204 | -1.362368 | -0.448479 |
| C  | -6.890591 | 0.020273  | -0.201729 |
| H  | 0.132183  | 3.016495  | 0.500042  |
| H  | -2.043680 | 4.212170  | 0.628121  |
| H  | -4.184833 | 2.998478  | 0.432748  |
| H  | -5.897740 | 1.877601  | 0.181880  |
| H  | -7.886434 | 0.471246  | -0.162778 |
| H  | -7.639102 | -1.982724 | -0.601920 |
| H  | -5.338313 | -2.992198 | -0.686222 |
| H  | -1.069303 | -1.590010 | -0.238913 |

-----

Phenanthridine (C8)

34

|    |           |           |           |
|----|-----------|-----------|-----------|
| Mo | 2.679781  | -0.487219 | -0.070960 |
| S  | 4.710076  | 0.092588  | 1.089256  |
| C  | 5.510045  | 1.274783  | 0.043532  |
| H  | 6.535328  | 1.546026  | 0.322213  |
| C  | 4.891149  | 1.865338  | -0.994922 |
| H  | 5.387598  | 2.624846  | -1.609304 |
| S  | 3.225563  | 1.464946  | -1.435467 |
| S  | 1.527392  | -0.889855 | 1.862853  |
| O  | 0.670178  | 0.027748  | -0.655476 |
| H  | 0.500241  | 0.519272  | -1.474054 |
| C  | -0.617832 | -0.114598 | 0.112579  |
| H  | 0.111880  | -0.636493 | 1.157183  |
| C  | -1.176542 | 1.142913  | 0.559437  |
| O  | 3.013301  | -1.919999 | -0.891285 |
| C  | -2.916035 | -0.837511 | -0.387401 |
| C  | -3.459099 | 0.375060  | 0.141171  |
| C  | -2.532951 | 1.357146  | 0.598025  |
| C  | -1.530939 | -1.054799 | -0.438530 |
| C  | -3.848619 | -1.825463 | -0.879934 |
| C  | -4.894590 | 0.525470  | 0.156951  |
| N  | -5.141837 | -1.704242 | -0.872314 |
| C  | -5.692377 | -0.546124 | -0.361386 |
| C  | -5.569448 | 1.671164  | 0.656374  |
| C  | -7.102740 | -0.434829 | -0.360917 |
| C  | -6.952546 | 1.756057  | 0.644821  |
| C  | -7.731776 | 0.696489  | 0.132819  |
| H  | -0.479313 | 1.905560  | 0.917105  |
| H  | -2.898836 | 2.311439  | 0.983614  |
| H  | -1.138174 | -1.986944 | -0.854959 |
| H  | -4.989956 | 2.503359  | 1.061593  |
| H  | -7.442115 | 2.652403  | 1.037059  |
| H  | -8.822868 | 0.770094  | 0.126940  |
| H  | -7.666753 | -1.278457 | -0.766044 |
| H  | -3.433720 | -2.757792 | -1.291364 |

---

Phenanthridine (C9)

34

|    |           |           |           |
|----|-----------|-----------|-----------|
| Mo | 2.395510  | -0.517034 | 0.084379  |
| S  | 4.604754  | -0.246395 | 1.000535  |
| C  | 5.586573  | 0.322452  | -0.357288 |
| H  | 6.669619  | 0.349260  | -0.187867 |
| C  | 5.052057  | 0.760783  | -1.511617 |
| H  | 5.673604  | 1.145590  | -2.327997 |
| S  | 3.304886  | 0.761316  | -1.788491 |
| S  | 1.363913  | -0.046986 | 2.071922  |
| O  | 0.540024  | 0.358291  | -0.583902 |
| H  | 0.394778  | 0.562681  | -1.520693 |
| C  | -0.681179 | 0.725262  | 0.197892  |
| H  | 0.003969  | 0.364326  | 1.359423  |
| C  | -0.926460 | 2.148371  | 0.274540  |
| O  | 2.258261  | -2.151202 | -0.300524 |
| C  | -3.111246 | 0.358723  | -0.003930 |
| C  | -3.332385 | 1.765237  | 0.155882  |
| C  | -2.208071 | 2.632655  | 0.283681  |
| C  | -1.798572 | -0.129000 | -0.028044 |
| C  | -4.303258 | -0.472896 | -0.146994 |
| C  | -4.669922 | 2.256385  | 0.156632  |
| N  | -5.747540 | 1.527022  | 0.023281  |
| C  | -5.582574 | 0.167951  | -0.126197 |
| C  | -6.752203 | -0.623027 | -0.263496 |
| C  | -4.256848 | -1.878962 | -0.297402 |
| C  | -5.415581 | -2.630079 | -0.429183 |
| C  | -6.675629 | -1.996698 | -0.413420 |
| H  | -0.062662 | 2.810624  | 0.374703  |
| H  | -2.384739 | 3.708914  | 0.382080  |
| H  | -1.591481 | -1.192237 | -0.163299 |
| H  | -7.709752 | -0.097161 | -0.242816 |
| H  | -7.588357 | -2.591080 | -0.515821 |
| H  | -5.348867 | -3.715621 | -0.543196 |
| H  | -3.290497 | -2.387363 | -0.304065 |
| H  | -4.817017 | 3.341039  | 0.275874  |

-----

Phenanthridine (C10)

34

|    |           |           |           |
|----|-----------|-----------|-----------|
| Mo | 1.934600  | -0.566206 | 0.018875  |
| S  | 3.801306  | 0.521280  | 1.080081  |
| C  | 4.490023  | 1.555059  | -0.181098 |
| H  | 5.458553  | 2.015277  | 0.048654  |
| C  | 3.844901  | 1.823426  | -1.330764 |
| H  | 4.266002  | 2.496979  | -2.085752 |
| S  | 2.262277  | 1.123518  | -1.704405 |
| S  | 0.737020  | -0.680345 | 1.968134  |
| O  | -0.118687 | -0.552922 | -0.721398 |
| H  | -0.218816 | -0.660955 | -1.680932 |
| C  | -1.270353 | -1.247255 | -0.039143 |
| H  | -0.624352 | -1.021534 | 1.175659  |
| C  | -2.558375 | -0.564843 | -0.079944 |
| O  | 2.492739  | -2.081264 | -0.471825 |
| C  | -2.423574 | -3.397365 | -0.402253 |
| C  | -3.666565 | -2.767096 | -0.372608 |
| C  | -3.731427 | -1.362812 | -0.228941 |
| C  | -1.252661 | -2.655614 | -0.285954 |
| C  | -5.006467 | -0.691994 | -0.260062 |
| C  | -2.739119 | 0.863398  | 0.078307  |
| C  | -4.073414 | 1.386962  | 0.017185  |
| N  | -5.184776 | 0.588753  | -0.157082 |
| C  | -1.680210 | 1.783712  | 0.308345  |
| C  | -4.294473 | 2.777852  | 0.154125  |
| C  | -3.239481 | 3.648418  | 0.365713  |
| C  | -1.927110 | 3.140015  | 0.450084  |
| H  | -0.271996 | -3.139119 | -0.320808 |
| H  | -2.358524 | -4.481424 | -0.535961 |
| H  | -4.592860 | -3.336761 | -0.483197 |
| H  | -5.904230 | -1.316370 | -0.388005 |
| H  | -5.329119 | 3.123703  | 0.093562  |
| H  | -3.421483 | 4.721864  | 0.472333  |
| H  | -0.658311 | 1.423241  | 0.389693  |
| H  | -1.086416 | 3.816195  | 0.626876  |

-----  
-----



*B3LYP-D3 transition state coordinates for a concerted reaction mechanism for phenanthridine.*

Phenanthridine (C1)

34

|    |           |           |           |
|----|-----------|-----------|-----------|
| Mo | 1.914437  | -0.603514 | 0.015486  |
| S  | 3.780861  | 0.506716  | 1.069230  |
| C  | 4.414954  | 1.589127  | -0.181807 |
| H  | 5.375498  | 2.071280  | 0.037763  |
| C  | 3.739605  | 1.869795  | -1.312007 |
| H  | 4.129963  | 2.571813  | -2.057978 |
| S  | 2.167918  | 1.134682  | -1.670644 |
| S  | 0.724319  | -0.758084 | 1.964565  |
| O  | -0.118233 | -0.614003 | -0.725245 |
| H  | -0.239243 | -0.696046 | -1.684229 |
| C  | -1.298358 | -1.265428 | -0.034000 |
| H  | -0.649033 | -1.072677 | 1.165171  |
| C  | -2.544685 | -0.514824 | -0.078272 |
| O  | 2.493006  | -2.100573 | -0.502605 |
| C  | -2.551773 | -3.341022 | -0.429067 |
| C  | -3.760501 | -2.645517 | -0.413664 |
| C  | -3.766855 | -1.240907 | -0.256316 |
| C  | -1.342846 | -2.669456 | -0.287726 |
| N  | -4.999959 | -0.615769 | -0.306983 |
| C  | -2.620339 | 0.917099  | 0.100969  |
| C  | -3.912786 | 1.524964  | 0.027181  |
| C  | -5.051315 | 0.674499  | -0.183821 |
| C  | -1.508814 | 1.765857  | 0.359742  |
| C  | -4.061618 | 2.922278  | 0.181694  |
| C  | -2.958454 | 3.724605  | 0.418335  |
| C  | -1.681113 | 3.131538  | 0.514840  |
| H  | -0.385282 | -3.196757 | -0.311966 |
| H  | -2.547627 | -4.426162 | -0.570600 |
| H  | -4.722086 | -3.143862 | -0.546274 |
| H  | -5.064776 | 3.355967  | 0.114398  |
| H  | -3.073131 | 4.805873  | 0.536050  |
| H  | -0.511109 | 1.350091  | 0.454769  |
| H  | -0.802903 | 3.752612  | 0.710575  |
| H  | -6.044825 | 1.146855  | -0.236249 |

-----

Phenanthridine (C2)

34

|    |           |           |           |
|----|-----------|-----------|-----------|
| Mo | 2.391809  | -0.546878 | 0.059384  |
| S  | 4.611552  | -0.270938 | 0.963080  |
| C  | 5.563964  | 0.376565  | -0.382157 |
| H  | 6.648698  | 0.421817  | -0.225564 |
| C  | 5.006440  | 0.849694  | -1.512535 |
| H  | 5.612438  | 1.281247  | -2.317512 |
| S  | 3.255369  | 0.820272  | -1.774147 |
| S  | 1.365121  | -0.154191 | 2.063298  |
| O  | 0.520413  | 0.301672  | -0.584593 |
| H  | 0.383982  | 0.585090  | -1.501605 |
| C  | -0.689849 | 0.668613  | 0.225612  |
| H  | -0.015445 | 0.273720  | 1.357714  |
| C  | -0.909689 | 2.092835  | 0.331155  |
| O  | 2.282817  | -2.169235 | -0.379061 |
| C  | -3.126853 | 0.351102  | 0.008690  |
| C  | -3.327291 | 1.763488  | 0.197766  |
| C  | -2.181510 | 2.601614  | 0.347329  |
| C  | -1.821730 | -0.157421 | -0.022544 |
| C  | -4.321122 | -0.470173 | -0.152204 |
| N  | -4.559605 | 2.351791  | 0.222609  |
| C  | -5.622053 | 1.607712  | 0.071814  |
| C  | -5.588943 | 0.183765  | -0.119212 |
| C  | -6.776570 | -0.574358 | -0.269202 |
| C  | -4.297141 | -1.874485 | -0.328726 |
| C  | -5.471472 | -2.598394 | -0.473163 |
| C  | -6.723488 | -1.946042 | -0.445762 |
| H  | -0.030768 | 2.732050  | 0.447537  |
| H  | -2.363174 | 3.672677  | 0.466968  |
| H  | -6.600818 | 2.108751  | 0.094804  |
| H  | -1.628224 | -1.220151 | -0.179731 |
| H  | -7.739268 | -0.053877 | -0.242200 |
| H  | -7.644551 | -2.524807 | -0.559524 |
| H  | -5.425663 | -3.682772 | -0.607258 |
| H  | -3.341195 | -2.400821 | -0.346038 |

-----

Phenanthridine (C3)

34

|    |           |           |           |
|----|-----------|-----------|-----------|
| Mo | 2.694282  | -0.440720 | -0.007423 |
| S  | 4.682949  | 0.202284  | 1.201326  |
| C  | 5.460306  | 1.415973  | 0.172986  |
| H  | 6.469826  | 1.724281  | 0.471369  |
| C  | 4.843083  | 1.987981  | -0.877839 |
| H  | 5.328764  | 2.765465  | -1.478761 |
| S  | 3.200094  | 1.533459  | -1.356852 |
| S  | 1.504511  | -0.863695 | 1.897190  |
| O  | 0.687276  | -0.016200 | -0.665183 |
| H  | 0.520899  | 0.450553  | -1.498509 |
| C  | -0.607062 | -0.141062 | 0.086732  |
| H  | 0.096674  | -0.651474 | 1.156941  |
| C  | -1.154735 | 1.126749  | 0.513368  |
| O  | 3.094158  | -1.862643 | -0.815064 |
| C  | -2.901068 | -0.880981 | -0.409422 |
| C  | -3.438760 | 0.350011  | 0.104960  |
| C  | -2.509372 | 1.337458  | 0.547328  |
| C  | -1.514923 | -1.089940 | -0.453244 |
| N  | -3.715971 | -1.895055 | -0.888217 |
| C  | -4.867618 | 0.518541  | 0.129819  |
| C  | -5.002206 | -1.730306 | -0.855141 |
| C  | -5.673690 | -0.555310 | -0.361529 |
| C  | -5.539660 | 1.677849  | 0.608114  |
| C  | -7.082701 | -0.451192 | -0.362126 |
| C  | -6.921919 | 1.759224  | 0.595588  |
| C  | -7.709682 | 0.691086  | 0.108521  |
| H  | -0.450451 | 1.887533  | 0.859398  |
| H  | -2.877956 | 2.295445  | 0.921476  |
| H  | -1.138077 | -2.032536 | -0.854352 |
| H  | -4.960878 | 2.519229  | 0.993244  |
| H  | -7.410658 | 2.664164  | 0.968928  |
| H  | -8.800105 | 0.769200  | 0.105564  |
| H  | -7.671412 | -1.291727 | -0.743747 |
| H  | -5.625377 | -2.554246 | -1.237060 |

-----

**Phenanthridine (C4)**

34

|    |           |           |           |
|----|-----------|-----------|-----------|
| Mo | 2.139983  | -0.512530 | 0.108800  |
| S  | 4.365835  | -0.306869 | 1.021999  |
| C  | 5.373819  | 0.169280  | -0.354156 |
| H  | 6.457424  | 0.157507  | -0.183361 |
| C  | 4.862347  | 0.586839  | -1.527724 |
| H  | 5.506275  | 0.913250  | -2.352734 |
| S  | 3.117865  | 0.646656  | -1.819565 |
| S  | 1.131986  | 0.072851  | 2.074946  |
| O  | 0.363594  | 0.489638  | -0.602577 |
| H  | 0.300916  | 0.782765  | -1.524014 |
| C  | -0.772726 | 1.041907  | 0.169030  |
| H  | -0.185374 | 0.608597  | 1.328343  |
| C  | -0.826136 | 2.469667  | 0.196455  |
| O  | 1.937306  | -2.150534 | -0.207187 |
| C  | -3.272724 | 1.034129  | 0.059043  |
| C  | -3.262837 | 2.439335  | 0.211187  |
| C  | -2.046174 | 3.130159  | 0.259870  |
| C  | -2.031636 | 0.324962  | -0.014919 |
| N  | -1.949000 | -1.019528 | -0.203951 |
| C  | -4.489289 | 0.243937  | -0.062441 |
| C  | -4.360778 | -1.164074 | -0.255602 |
| C  | -3.040364 | -1.722704 | -0.322039 |
| C  | -5.796347 | 0.788805  | 0.000046  |
| C  | -5.518776 | -1.971749 | -0.377343 |
| C  | -6.781757 | -1.411640 | -0.310407 |
| C  | -6.916916 | -0.018404 | -0.119271 |
| H  | 0.122219  | 3.009877  | 0.247217  |
| H  | -2.055360 | 4.221421  | 0.345589  |
| H  | -4.198347 | 2.998125  | 0.258811  |
| H  | -2.930206 | -2.805382 | -0.476265 |
| H  | -5.928073 | 1.861917  | 0.149045  |
| H  | -7.914207 | 0.427721  | -0.063777 |
| H  | -7.671964 | -2.039998 | -0.403949 |
| H  | -5.393332 | -3.048897 | -0.524914 |

---

Phenanthridine (C6 - Primary SOM)

34

|    |           |           |           |
|----|-----------|-----------|-----------|
| Mo | 2.002787  | -0.354736 | 0.033589  |
| S  | 4.088413  | 0.173905  | 1.129466  |
| C  | 4.995146  | 1.121929  | -0.057834 |
| H  | 6.037289  | 1.343327  | 0.202341  |
| C  | 4.441021  | 1.612595  | -1.181906 |
| H  | 5.011930  | 2.232843  | -1.882144 |
| S  | 2.759475  | 1.283443  | -1.621818 |
| S  | 0.839371  | -0.312215 | 1.962021  |
| O  | 0.073002  | 0.279184  | -0.743552 |
| H  | 0.079795  | 1.191665  | -1.090602 |
| C  | -1.210344 | 0.235718  | 0.028046  |
| H  | -0.612404 | 0.040345  | 1.170935  |
| N  | -1.799237 | 1.439373  | -0.031239 |
| O  | 2.132210  | -1.940950 | -0.528195 |
| C  | -3.407021 | -0.919732 | -0.144660 |
| C  | -4.021741 | 0.395866  | 0.033657  |
| C  | -3.148069 | 1.536864  | 0.032090  |
| C  | -1.992029 | -1.006719 | -0.208558 |
| C  | -1.362945 | -2.248144 | -0.415875 |
| C  | -4.152803 | -2.111879 | -0.300361 |
| C  | -2.121094 | -3.404360 | -0.564233 |
| C  | -3.523281 | -3.333371 | -0.501451 |
| C  | -3.731021 | 2.834861  | 0.103075  |
| C  | -5.410602 | 0.603772  | 0.151302  |
| C  | -5.953997 | 1.880845  | 0.243757  |
| C  | -5.100882 | 3.003093  | 0.208990  |
| H  | -6.083223 | -0.256971 | 0.172036  |
| H  | -7.035598 | 2.011396  | 0.339763  |
| H  | -5.522448 | 4.011066  | 0.274681  |
| H  | -3.047558 | 3.687108  | 0.088354  |
| H  | -0.274465 | -2.304269 | -0.465278 |
| H  | -1.622384 | -4.363217 | -0.729221 |
| H  | -4.124469 | -4.240223 | -0.618177 |
| H  | -5.243465 | -2.074829 | -0.272549 |

---

Phenanthridine (C7)

34

|    |           |           |           |
|----|-----------|-----------|-----------|
| Mo | 2.123539  | -0.464295 | 0.143716  |
| S  | 4.354885  | -0.526423 | 1.054956  |
| C  | 5.397286  | 0.010663  | -0.273543 |
| H  | 6.476637  | -0.097193 | -0.111250 |
| C  | 4.918523  | 0.580642  | -1.394924 |
| H  | 5.583503  | 0.941290  | -2.188053 |
| S  | 3.182013  | 0.791760  | -1.667881 |
| S  | 1.134872  | 0.019108  | 2.145916  |
| O  | 0.392199  | 0.656081  | -0.501426 |
| H  | 0.362917  | 1.066972  | -1.379203 |
| C  | -0.764521 | 1.142538  | 0.306541  |
| H  | -0.153584 | 0.658408  | 1.442714  |
| C  | -0.848951 | 2.562289  | 0.416924  |
| O  | 1.758749  | -2.042564 | -0.315336 |
| C  | -3.255598 | 1.077340  | 0.156823  |
| C  | -3.286018 | 2.470488  | 0.392780  |
| C  | -2.088240 | 3.186050  | 0.503359  |
| C  | -1.999891 | 0.409870  | 0.073332  |
| C  | -1.971662 | -0.994295 | -0.197781 |
| C  | -4.443336 | 0.259165  | -0.044175 |
| C  | -4.265201 | -1.134145 | -0.314474 |
| N  | -3.033115 | -1.736180 | -0.390107 |
| C  | -5.763643 | 0.769252  | 0.010834  |
| C  | -5.407567 | -1.951655 | -0.518669 |
| C  | -6.684748 | -1.424356 | -0.458445 |
| C  | -6.863605 | -0.050075 | -0.190300 |
| H  | 0.083668  | 3.123208  | 0.513997  |
| H  | -2.126251 | 4.269409  | 0.655218  |
| H  | -4.235498 | 3.002565  | 0.457706  |
| H  | -5.923514 | 1.829519  | 0.217034  |
| H  | -7.872064 | 0.370444  | -0.140101 |
| H  | -7.554541 | -2.068354 | -0.617501 |
| H  | -5.227162 | -3.009449 | -0.723351 |
| H  | -0.997271 | -1.494506 | -0.259312 |

-----

Phenanthridine (C8)

34

|    |           |           |           |
|----|-----------|-----------|-----------|
| Mo | 2.688434  | -0.503473 | -0.057335 |
| S  | 4.699641  | 0.146391  | 1.107969  |
| C  | 5.474325  | 1.331470  | 0.044385  |
| H  | 6.488951  | 1.639021  | 0.325594  |
| C  | 4.846185  | 1.892058  | -1.005994 |
| H  | 5.328220  | 2.654907  | -1.628069 |
| S  | 3.196626  | 1.433791  | -1.457989 |
| S  | 1.518441  | -0.867515 | 1.874067  |
| O  | 0.679432  | -0.061524 | -0.699054 |
| H  | 0.523216  | 0.455103  | -1.504771 |
| C  | -0.606590 | -0.150950 | 0.074460  |
| H  | 0.109764  | -0.646777 | 1.150381  |
| C  | -1.138636 | 1.131576  | 0.476415  |
| O  | 3.054560  | -1.951015 | -0.835468 |
| C  | -2.913695 | -0.861600 | -0.378497 |
| C  | -3.433816 | 0.377045  | 0.110875  |
| C  | -2.491244 | 1.365076  | 0.520177  |
| C  | -1.532829 | -1.099243 | -0.435407 |
| C  | -3.863910 | -1.856919 | -0.819735 |
| C  | -4.866565 | 0.546005  | 0.137078  |
| N  | -5.155422 | -1.720720 | -0.798354 |
| C  | -5.684219 | -0.536135 | -0.326793 |
| C  | -5.521339 | 1.720437  | 0.594725  |
| C  | -7.093145 | -0.409529 | -0.308861 |
| C  | -6.903359 | 1.822181  | 0.596737  |
| C  | -7.701825 | 0.749044  | 0.145857  |
| H  | -0.421304 | 1.892056  | 0.796254  |
| H  | -2.842538 | 2.337202  | 0.872840  |
| H  | -1.149038 | -2.047647 | -0.821211 |
| H  | -4.926908 | 2.563251  | 0.953278  |
| H  | -7.377119 | 2.740926  | 0.954968  |
| H  | -8.791998 | 0.835099  | 0.152102  |
| H  | -7.672839 | -1.262903 | -0.668914 |
| H  | -3.465298 | -2.809418 | -1.199734 |

-----



Phenanthridine (C9)

34

|    |           |           |           |
|----|-----------|-----------|-----------|
| Mo | 2.390762  | -0.512045 | 0.090080  |
| S  | 4.606992  | -0.254766 | 1.003498  |
| C  | 5.583662  | 0.322405  | -0.356517 |
| H  | 6.668297  | 0.344827  | -0.195077 |
| C  | 5.043936  | 0.773179  | -1.504506 |
| H  | 5.664999  | 1.161978  | -2.319677 |
| S  | 3.294108  | 0.783256  | -1.775079 |
| S  | 1.354184  | -0.043975 | 2.074299  |
| O  | 0.537102  | 0.351672  | -0.587913 |
| H  | 0.386422  | 0.547718  | -1.525463 |
| C  | -0.681760 | 0.720805  | 0.194206  |
| H  | -0.007453 | 0.363681  | 1.357611  |
| C  | -0.920850 | 2.144728  | 0.268861  |
| O  | 2.249670  | -2.143258 | -0.302722 |
| C  | -3.107709 | 0.354733  | -0.006511 |
| C  | -3.325770 | 1.762120  | 0.153270  |
| C  | -2.201398 | 2.630632  | 0.278984  |
| C  | -1.796913 | -0.134760 | -0.030714 |
| C  | -4.300703 | -0.474372 | -0.147763 |
| C  | -4.662351 | 2.255550  | 0.155881  |
| N  | -5.741879 | 1.528323  | 0.024437  |
| C  | -5.579369 | 0.169128  | -0.125785 |
| C  | -6.750561 | -0.619864 | -0.261211 |
| C  | -4.256737 | -1.880518 | -0.297401 |
| C  | -5.416762 | -2.629950 | -0.427500 |
| C  | -6.675711 | -1.993838 | -0.410554 |
| H  | -0.051101 | 2.799049  | 0.366396  |
| H  | -2.378150 | 3.706900  | 0.376912  |
| H  | -1.583727 | -1.196684 | -0.163927 |
| H  | -7.707721 | -0.093279 | -0.240162 |
| H  | -7.589526 | -2.586614 | -0.512346 |
| H  | -5.352342 | -3.715769 | -0.540017 |
| H  | -3.291149 | -2.390199 | -0.304987 |
| H  | -4.807384 | 3.340350  | 0.275980  |

-----

Phenanthridine (C10)

34

|    |           |           |           |
|----|-----------|-----------|-----------|
| Mo | 1.901397  | -0.590176 | 0.008435  |
| S  | 3.780544  | 0.492031  | 1.064788  |
| C  | 4.424727  | 1.571618  | -0.183845 |
| H  | 5.392050  | 2.040307  | 0.034707  |
| C  | 3.747895  | 1.868104  | -1.309134 |
| H  | 4.144526  | 2.568543  | -2.053180 |
| S  | 2.165489  | 1.155258  | -1.666651 |
| S  | 0.714236  | -0.749740 | 1.958533  |
| O  | -0.136538 | -0.591607 | -0.727046 |
| H  | -0.266334 | -0.649890 | -1.686643 |
| C  | -1.312499 | -1.235836 | -0.036286 |
| H  | -0.657849 | -1.051274 | 1.166993  |
| C  | -2.558467 | -0.483029 | -0.060814 |
| O  | 2.467169  | -2.088366 | -0.519559 |
| C  | -2.582793 | -3.309833 | -0.429005 |
| C  | -3.789277 | -2.610975 | -0.388372 |
| C  | -3.775861 | -1.207445 | -0.221412 |
| C  | -1.371411 | -2.639015 | -0.297606 |
| C  | -5.008161 | -0.459822 | -0.234790 |
| C  | -2.648557 | 0.950212  | 0.119425  |
| C  | -3.949624 | 1.554292  | 0.076968  |
| N  | -5.107774 | 0.827332  | -0.103412 |
| C  | -1.532889 | 1.799421  | 0.352693  |
| C  | -4.083863 | 2.953666  | 0.239066  |
| C  | -2.974389 | 3.754308  | 0.450782  |
| C  | -1.694744 | 3.165645  | 0.515350  |
| H  | -0.416217 | -3.169563 | -0.341638 |
| H  | -2.580587 | -4.393514 | -0.580083 |
| H  | -4.745505 | -3.126671 | -0.509740 |
| H  | -5.943296 | -1.025016 | -0.369801 |
| H  | -5.095098 | 3.364910  | 0.192480  |
| H  | -3.089197 | 4.835206  | 0.573994  |
| H  | -0.533903 | 1.380518  | 0.418886  |
| H  | -0.811069 | 3.784646  | 0.691229  |

-----  
-----
